# Supplementary material
Source: publisher figshare collection journal article supplement (https://gsajournals.figshare.com/ndownloader/files/14766395)
Supplement: Supplementary file 1 [file 14766395]

## Sheet: Table S1. shared DEGs
E. diaphana geneID	Gene name	Discription	UniprotID	C. intestinalis geneID	GOID
AIPGENE3542	4-Oct	Organic cation/carnitine transporter 4	Q9LHQ6	ENSCINP00000001843.3	GO:0005215 GO:0016020 GO:0016021 GO:0022857 GO:0022891 GO:0055085
AIPGENE21249	ABCG2	ATP-binding cassette sub-family G member 2	Q80W57	ENSCINP00000008035.3	GO:0000166 GO:0005524 GO:0016020 GO:0016021 GO:0016887
AIPGENE25480	ACES	Acetylcholinesterase	O62763	ENSCINP00000031848.1
AIPGENE9142	ACTC	Actin, cytoplasmic	P12716	ENSCINP00000001538.3	GO:0000166 GO:0005524
AIPGENE4946	AGRIN	Agrin	A2ASQ1	ENSCINP00000024219.2
AIPGENE5636	AL1L1	Cytosolic 10-formyltetrahydrofolate dehydrogenase	Q6GNL7	ENSCINP00000016529.3	GO:0003824 GO:0005737 GO:0006730 GO:0008152 GO:0009058 GO:0009258 GO:0016155 GO:0016491 GO:0016620 GO:0016742 GO:0019145 GO:0047105 GO:0055114
AIPGENE17420	AMT1	Putative ammonium transporter 1	P54145	ENSCINP00000012012.3	GO:0005887 GO:0006810 GO:0008519 GO:0015695 GO:0015696 GO:0016020 GO:0016021 GO:0019740 GO:0072488
AIPGENE19941	ARLZ	Probable argininosuccinate lyase	P50514	ENSCINP00000013034.3	GO:0003824 GO:0004056 GO:0005829 GO:0006526 GO:0042450 GO:0051262
AIPGENE8629	ARMET	Mesencephalic astrocyte-derived neurotrophic factor homolog	B4QX46	ENSCINP00000031474.1
AIPGENE2483	ATHL1	Acid trehalase-like protein 1	A0JMP0	ENSCINP00000005930.3	GO:0003824 GO:0005975
AIPGENE15022	BETT	High-affinity choline transport protein	P0ABC9
AIPGENE22194	CALL3	Calmodulin-like protein 3	Q5U206	ENSCINP00000017574.3
AIPGENE9256	CALR	Calreticulin	P29413	ENSCINP00000016510.3
AIPGENE25880	CALUA	Calumenin-A	B5X186	ENSCINP00000025165.2	GO:0005509
AIPGENE308	CALUA	Calumenin-A	Q6IQP3	ENSCINP00000007993.2	GO:0005509
AIPGENE9938	CALUB	Calumenin-B	B5X4E0	ENSCINP00000025165.2	GO:0005509
AIPGENE13229	CBPA2	Carboxypeptidase A2	Q504N0	ENSCINP00000011346.3	GO:0004180 GO:0004181 GO:0005615 GO:0006508 GO:0008270
AIPGENE13576	CBPA4	Carboxypeptidase A4	Q9UI42	ENSCINP00000011346.3	GO:0004180 GO:0004181 GO:0005615 GO:0006508 GO:0008270
AIPGENE18534	CO1A2	Collagen alpha-2(I) chain	P02466	ENSCINP00000003025.3	GO:0005201 GO:0005578 GO:0005581
AIPGENE25170	CO1A2	Collagen alpha-2(I) chain	O42350	ENSCINP00000014311.3	GO:0005201 GO:0005581
AIPGENE25192	CO1A2	Collagen alpha-2(I) chain	P08123	ENSCINP00000017221.3
AIPGENE8376	CO1A2	Collagen alpha-2(I) chain	P02466	ENSCINP00000017221.3
AIPGENE5608	CO4A1	Collagen alpha-1(IV) chain	P17139	ENSCINP00000016017.3
AIPGENE12347	CO6A6	Collagen alpha-6(VI) chain	A6NMZ7	ENSCINP00000031657.1
AIPGENE25189	COA	Collagen alpha chain (Fragment)	B8V7R6	ENSCINP00000017221.3
AIPGENE1554	CP17A	Steroid 17-alpha-hydroxylase/17,20 lyase	P30437	ENSCINP00000032679.1
AIPGENE16058	CP17A	Steroid 17-alpha-hydroxylase/17,20 lyase	O73853	ENSCINP00000018595.3	GO:0004497 GO:0005506 GO:0008395 GO:0016020 GO:0016021 GO:0016491 GO:0016705 GO:0020037 GO:0046872 GO:0055114
AIPGENE15958	CP341	Cytochrome P450 3A41	Q9JMA7	ENSCINP00000036138.1
AIPGENE25863	CRA1B	Collagen alpha-1(XXVII) chain B	A0MSJ1	ENSCINP00000016017.3
AIPGENE25893	CRA1B	Collagen alpha-1(XXVII) chain B	A0MSJ1	ENSCINP00000017221.3
AIPGENE6906	CREL2	Cysteine-rich with EGF-like domain protein 2	Q7SXF6	ENSCINP00000024648.2	GO:0005509 GO:0016020 GO:0016021
AIPGENE7700	CTP5B	Contactin-associated protein like 5-2	Q0V8T5	ENSCINP00000010501.3
AIPGENE2858	DDX5	Probable ATP-dependent RNA helicase DDX5	Q61656	ENSCINP00000008570.3	GO:0000166 GO:0003676 GO:0004004 GO:0004386 GO:0005524 GO:0010501 GO:0016787 GO:0045893
AIPGENE26806	DEFM	Peptide deformylase, mitochondrial	Q9HBH1
AIPGENE11883	DEGS1	Sphingolipid delta(4)-desaturase DES1	Q3ZBY7	ENSCINP00000030732.1
AIPGENE5812	DJB11	DnaJ homolog subfamily B member 11	Q6TUG0	ENSCINP00000032640.1	GO:0006457 GO:0051082
AIPGENE25828	DNJC3	DnaJ homolog subfamily C member 3	Q27968	ENSCINP00000019020.3
AIPGENE18998	DPEP1	Dipeptidase 1	P16444	ENSCINP00000028153.2
AIPGENE6957	ENPL	Endoplasmin	Q66HD0	ENSCINP00000015093.3	GO:0005524 GO:0006457 GO:0006950 GO:0051082
AIPGENE2929	FA8	Coagulation factor VIII	P12263	ENSCINP00000006532.3	GO:0005509
AIPGENE3461	FABL	Enoyl-[acyl-carrier-protein] reductase [NADPH] FabL	P71079	ENSCINP00000018876.3	GO:0016491 GO:0055114
AIPGENE4474	FGFR	Fibroblast growth factor receptor	Q26614	ENSCINP00000001598.3	GO:0004672 GO:0004713 GO:0005007 GO:0005524 GO:0006468 GO:0008284 GO:0008543 GO:0016020 GO:0016021 GO:0018108
AIPGENE17494	FGFR4	Fibroblast growth factor receptor 4	Q498D6	ENSCINP00000001598.3	GO:0004672 GO:0004713 GO:0005007 GO:0005524 GO:0006468 GO:0008284 GO:0008543 GO:0016020 GO:0016021 GO:0018108
AIPGENE20955	FKBP2	Peptidyl-prolyl cis-trans isomerase FKBP2	P45878	ENSCINP00000030674.1
AIPGENE6958	FP	Fibronectin type III domain-containing protein	B8VIW9
AIPGENE22443	FRIS	Soma ferritin	P42577	ENSCINP00000035294.1
AIPGENE25324	GAPR1	Golgi-associated plant pathogenesis-related protein 1	Q9CYL5	ENSCINP00000001814.3	GO:0005576
AIPGENE8921	GAPR1	Golgi-associated plant pathogenesis-related protein 1	Q9H4G4	ENSCINP00000010145.3	GO:0005576
AIPGENE26077	GLT1	Putative glutamate synthase [NADPH]	Q9C102	ENSCINP00000007792.3	GO:0003824 GO:0005737 GO:0006212 GO:0016491 GO:0016627 GO:0017113 GO:0051536 GO:0055114
AIPGENE22837	GMDS	GDP-mannose 4,6 dehydratase	Q8K3X3	ENSCINP00000010294.3	GO:0008446 GO:0019673
AIPGENE26977	GPDM	Glycerol-3-phosphate dehydrogenase, mitochondrial	A6QLU1	ENSCINP00000002723.3	GO:0004368 GO:0005509 GO:0006072 GO:0009331 GO:0016491 GO:0052590 GO:0052591 GO:0055114
AIPGENE5657	GPX1	Glutathione peroxidase	Q00277	ENSCINP00000035821.1	GO:0004601 GO:0004602 GO:0006979 GO:0016491 GO:0055114 GO:0098869
AIPGENE12496	GRP78	78 kDa glucose-regulated protein	Q90593	ENSCINP00000019494.3	GO:0000166 GO:0005524
AIPGENE6332	GSTM1	Glutathione S-transferase Mu 1	Q9N0V4	ENSCINP00000010811.1	GO:0004364 GO:0008152
AIPGENE12082	GTR1	Solute carrier family 2, facilitated glucose transporter member 1	P20303	ENSCINP00000003472.3	GO:0005215 GO:0006810 GO:0016020 GO:0016021 GO:0022857 GO:0022891 GO:0055085
AIPGENE3199	H90A1	Heat shock protein HSP 90-alpha 1	Q90474	ENSCINP00000023416.2	GO:0005524 GO:0006457 GO:0006950 GO:0051082
AIPGENE15071	HE	Hatching enzyme	P22757	ENSCINP00000017258.3
AIPGENE4831	HELT	Hairy and enhancer of split-related protein HELT	A6NFD8	ENSCINP00000013234.3	GO:0003677 GO:0005634 GO:0006351 GO:0006355 GO:0046983
AIPGENE157	HMGB3	High mobility group protein B3	Q32L31	ENSCINP00000007915.3
AIPGENE27402	HMGX3	HMG domain-containing protein 3	Q12766	ENSCINP00000030465.1
AIPGENE22432	HSP31	Glyoxalase 3	Q5AF03
AIPGENE651	HYOU1	Hypoxia up-regulated protein 1	Q7ZUW2	ENSCINP00000031737.1	GO:0000166 GO:0005524
AIPGENE3465	IF44L	Interferon-induced protein 44-like	Q53G44	ENSCINP00000019144.3
AIPGENE11910	ISCA2	Iron-sulfur cluster assembly 2 homolog, mitochondrial	Q86U28	ENSCINP00000036261.1	GO:0005198 GO:0006790 GO:0008198 GO:0016226 GO:0051536 GO:0051537 GO:0051539 GO:0097428
AIPGENE15815	ISCU	Iron-sulfur cluster assembly enzyme ISCU, mitochondrial	Q9D7P6	ENSCINP00000031409.1
AIPGENE22835	JMJCD	JmjC domain-containing protein D	Q55DF5	ENSCINP00000025973.2
AIPGENE7475	JMJD6	Bifunctional arginine demethylase and lysyl-hydroxylase JMJD6	Q5ZMK5	ENSCINP00000015483.3
AIPGENE7692	KCRS	Creatine kinase S-type, mitochondrial	P11009	ENSCINP00000017993.3
AIPGENE26035	KDM8	Lysine-specific demethylase 8	B2GUS6	ENSCINP00000010139.3	GO:0005509
AIPGENE6242	KDM8	Lysine-specific demethylase 8	B2GUS6	ENSCINP00000010188.3	GO:0005509
AIPGENE7224	KLKB1	Plasma kallikrein	P26262	ENSCINP00000025876.2	GO:0004252 GO:0006508 GO:0008233 GO:0008236 GO:0016787
AIPGENE21474	LICH	Putative lysosomal acid lipase/cholesteryl ester hydrolase	J3SDX8	ENSCINP00000032128.1	GO:0016042 GO:0016787 GO:0016788
AIPGENE3723	LMAN1	Protein ERGIC-53	Q9TU32	ENSCINP00000005331.3	GO:0016020 GO:0016021
AIPGENE13248	LONF3	LON peptidase N-terminal domain and RING finger protein 3	Q496Y0	ENSCINP00000026615.2
AIPGENE4997	MANF	Mesencephalic astrocyte-derived neurotrophic factor	P55145	ENSCINP00000031474.1
AIPGENE9298	MEP1B	Meprin A subunit beta	Q16820	ENSCINP00000017081.3	GO:0004222 GO:0006508 GO:0008233 GO:0008237 GO:0008270 GO:0016020 GO:0016787 GO:0046872
AIPGENE11428	METB	Cystathionine gamma-synthase	P56069	ENSCINP00000025947.2	GO:0003824 GO:0030170
AIPGENE14224	MIB	E3 ubiquitin-protein ligase mind-bomb	Q9VUX2	ENSCINP00000022163.2
AIPGENE14222	MIB1	E3 ubiquitin-protein ligase MIB1	Q86YT6	ENSCINP00000001354.3	GO:0004842 GO:0005737 GO:0006897 GO:0007219 GO:0008270 GO:0016567 GO:0046872
AIPGENE14267	MIB1	E3 ubiquitin-protein ligase MIB1	Q86YT6	ENSCINP00000001354.3	GO:0004842 GO:0005737 GO:0006897 GO:0007219 GO:0008270 GO:0016567 GO:0046872
AIPGENE14234	MIB2	E3 ubiquitin-protein ligase MIB2	Q5ZIJ9	ENSCINP00000001354.3	GO:0004842 GO:0005737 GO:0006897 GO:0007219 GO:0008270 GO:0016567 GO:0046872
AIPGENE22864	MLP	Mucin-like protein (Fragment)	B3EWY9	ENSCINP00000001942.3	GO:0005509
AIPGENE9728	MMEL1	Membrane metallo-endopeptidase-like 1	Q495T6	ENSCINP00000011815.3	GO:0004222 GO:0006508 GO:0008237
AIPGENE2999	MOT10	Monocarboxylate transporter 10	Q91Y77	ENSCINP00000007886.2	GO:0005215 GO:0016020 GO:0016021 GO:0034220 GO:0055085
AIPGENE5882	MTPN	Myotrophin	Q6P1S6	ENSCINP00000009430.3	GO:0005737 GO:0008093 GO:0030507 GO:0072661
AIPGENE13355	MZB1	Marginal zone B- and B1-cell-specific protein	Q8WU39	ENSCINP00000031626.1
AIPGENE13504	NETR	Neurotrypsin	O08762	ENSCINP00000013067.3	GO:0005044 GO:0005507 GO:0006898 GO:0016020 GO:0016641 GO:0055114
AIPGENE8193	NETR	Neurotrypsin	G3V801	ENSCINP00000013067.3	GO:0005044 GO:0005507 GO:0006898 GO:0016020 GO:0016641 GO:0055114
AIPGENE22061	NFS1	Cysteine desulfurase, mitochondrial	Q5RDE7	ENSCINP00000023238.2
AIPGENE4218	NHL1	RING finger protein nhl-1	Q03601	ENSCINP00000001697.3	GO:0005622 GO:0008270 GO:0046872
AIPGENE27652	NOTC3	Neurogenic locus notch homolog protein 3	Q9R172	ENSCINP00000000877.3	GO:0005509
AIPGENE5533	NPC1	Niemann-Pick C1 protein	O35604	ENSCINP00000008700.3	GO:0005319 GO:0006869 GO:0016020 GO:0016021
AIPGENE16104	NPHP3	Nephrocystin-3	Q7Z494	ENSCINP00000034474.1
AIPGENE25111	NSAD	2-hydroxychromene-2-carboxylate isomerase	Q9X9Q7	ENSCINP00000030897.1	GO:0015035 GO:0055114
AIPGENE1182	ORCT	Organic cation transporter protein	Q9VCA2	ENSCINP00000015651.3	GO:0005215 GO:0016020 GO:0016021 GO:0022857 GO:0022891 GO:0055085
AIPGENE1230	ORCT	Organic cation transporter protein	Q9VCA2	ENSCINP00000020124.3	GO:0005887 GO:0016020 GO:0016021 GO:0022857 GO:0022891 GO:0055085
AIPGENE1265	ORCT	Organic cation transporter protein	Q9VCA2	ENSCINP00000007897.3	GO:0016020 GO:0016021 GO:0022857 GO:0022891 GO:0055085
AIPGENE4038	ORCT	Organic cation transporter protein	Q9VCA2	ENSCINP00000035947.1	GO:0005452 GO:0005887 GO:0015347 GO:0015698 GO:0016020 GO:0016021 GO:0022857 GO:0043252 GO:0055085
AIPGENE9104	ORCT	Organic cation transporter protein	Q9VCA2	ENSCINP00000007897.3	GO:0016020 GO:0016021 GO:0022857 GO:0022891 GO:0055085
AIPGENE14447	PAG15	Group XV phospholipase A2	Q8NCC3	ENSCINP00000006478.3	GO:0006629 GO:0008374
AIPGENE27122	PCY2	Ethanolamine-phosphate cytidylyltransferase	Q99447	ENSCINP00000006470.3	GO:0003824 GO:0009058
AIPGENE12999	PDIA3	Protein disulfide-isomerase A3	Q5RDG4	ENSCINP00000005773.4	GO:0003756 GO:0005783 GO:0006457 GO:0009986 GO:0016853 GO:0034976 GO:0045454
AIPGENE9190	PDIA4	Protein disulfide-isomerase A4	P13667	ENSCINP00000013204.3	GO:0003756 GO:0005783 GO:0006457 GO:0016853 GO:0034976 GO:0045454
AIPGENE16230	PDIA6	Protein disulfide-isomerase A6	Q63081	ENSCINP00000008588.3	GO:0003756 GO:0005783 GO:0006457 GO:0016853 GO:0034976 GO:0043277 GO:0045454
AIPGENE18367	PGDH	15-hydroxyprostaglandin dehydrogenase [NAD(+)]	Q3T0C2	ENSCINP00000003988.3	GO:0016491 GO:0055114
AIPGENE20300	PGDH	15-hydroxyprostaglandin dehydrogenase [NAD(+)]	P70684	ENSCINP00000011563.3	GO:0016491 GO:0055114
AIPGENE15654	PGFS	Prostamide/prostaglandin F synthase	B5X9L9	ENSCINP00000025320.2
AIPGENE4566	PIF1	ATP-dependent DNA helicase PIF1	Q5AXT5	ENSCINP00000005776.3	GO:0000002 GO:0000166 GO:0000723 GO:0003677 GO:0003678 GO:0004386 GO:0005524 GO:0005634 GO:0005657 GO:0005739 GO:0006260 GO:0006281 GO:0006310 GO:0006974 GO:0010521 GO:0016787 GO:0032211 GO:0032508 GO:0043141 GO:0044806 GO:0051974
AIPGENE7117	POL2	Retrovirus-related Pol polyprotein from transposon 297	P20825	ENSCINP00000036259.1	GO:0003676 GO:0008270 GO:0015074
AIPGENE20500	POL3	Retrovirus-related Pol polyprotein from transposon 17.6	P04323	ENSCINP00000036259.1	GO:0003676 GO:0008270 GO:0015074
AIPGENE18183	PPD	Phosphonopyruvate decarboxylase	Q54271
AIPGENE18187	PPD	Phosphonopyruvate decarboxylase	Q54271
AIPGENE8936	PRPX	Pathogen-related protein	P16273
AIPGENE5760	PTPRQ	Phosphatidylinositol phosphatase PTPRQ	O88488	ENSCINP00000015322.3
AIPGENE25618	RAVR2	Ribonucleoprotein PTB-binding 2	Q9HCJ3	ENSCINP00000005147.3	GO:0000166 GO:0000398 GO:0003676 GO:0005634
AIPGENE27196	S23A2	Solute carrier family 23 member 2	Q9EPR4	ENSCINP00000007695.3	GO:0005215 GO:0006810 GO:0016020 GO:0016021 GO:0055085
AIPGENE27243	S23A2	Solute carrier family 23 member 2	Q9EPR4	ENSCINP00000007688.3	GO:0005215 GO:0006810 GO:0016020 GO:0016021 GO:0055085
AIPGENE22065	SAHH	Adenosylhomocysteinase	P27604	ENSCINP00000011751.3	GO:0004013 GO:0005829 GO:0006730 GO:0016787 GO:0033353
AIPGENE8159	SAHH	Adenosylhomocysteinase	P27604	ENSCINP00000011751.3	GO:0004013 GO:0005829 GO:0006730 GO:0016787 GO:0033353
AIPGENE6185	SC5A2	Sodium/glucose cotransporter 2	Q923I7	ENSCINP00000014618.3
AIPGENE15912	SC5A3	Sodium/myo-inositol cotransporter	P53793	ENSCINP00000014742.3
AIPGENE9202	SENP2	Sentrin-specific protease 2	Q5R7K7	ENSCINP00000020258.3	GO:0004175 GO:0005634 GO:0006508 GO:0008234 GO:0016926 GO:0016929
AIPGENE19729	SLD1	Delta(8)-fatty-acid desaturase	Q43469	ENSCINP00000019998.3
AIPGENE3185	SNED1	Sushi, nidogen and EGF-like domain-containing protein 1	Q70E20	ENSCINP00000030555.1	GO:0005509 GO:0007160
AIPGENE9034	SRSF4	Serine/arginine-rich splicing factor 4	Q8VE97	ENSCINP00000010229.3	GO:0000166 GO:0003676
AIPGENE9107	SVOP	Synaptic vesicle 2-related protein	Q2XWK0	ENSCINP00000013183.3	GO:0016020 GO:0016021 GO:0022857 GO:0022891 GO:0055085
AIPGENE12941	SYT9	Synaptotagmin-9	Q86SS6	ENSCINP00000001641.3	GO:0005509 GO:0005544 GO:0005886 GO:0006887 GO:0006906 GO:0016020 GO:0017158 GO:0019905 GO:0030276 GO:0048791 GO:0098793
AIPGENE3467	T53I2	Tumor protein p53-inducible nuclear protein 2	Q8IXH6
AIPGENE13971	TC1A	Transposable element Tc1 transposase	P03934
AIPGENE29241	TCNA	Sialidase	P23253	ENSCINP00000024742.2
AIPGENE18308	THAP9	DNA transposase THAP9	Q9H5L6	ENSCINP00000026647.2
AIPGENE8999	TNG2	Transport and Golgi organization protein 2 homolog	Q6ICL3
AIPGENE27609	TNR27	Tumor necrosis factor receptor superfamily member 27	Q8BX35
AIPGENE5278	TTC28	Tetratricopeptide repeat protein 28	Q80XJ3	ENSCINP00000018424.3
AIPGENE14672	TYRO	Tyrosinase	P55023	ENSCINP00000008838.3	GO:0008152 GO:0016491 GO:0046872 GO:0055114
AIPGENE3150	USOM5	Uncharacterized skeletal organic matrix protein 5	B8VIU6	ENSCINP00000013341.3	GO:0005344 GO:0006810 GO:0015671 GO:0019825 GO:0020037
AIPGENE16693	VWDE	von Willebrand factor D and EGF domain-containing protein	Q8N2E2	ENSCINP00000026946.2
AIPGENE25233	WHITE	Protein white	Q05360	ENSCINP00000009488.3	GO:0000166 GO:0005524 GO:0005886 GO:0006727 GO:0016020 GO:0016021 GO:0016887 GO:0042626 GO:0055085
AIPGENE12685	XDH	Xanthine dehydrogenase	P10351	ENSCINP00000031513.1	GO:0003824 GO:0004854 GO:0005506 GO:0005829 GO:0009055 GO:0009115 GO:0016491 GO:0016614 GO:0016903 GO:0046872 GO:0050660 GO:0051536 GO:0055114
AIPGENE19821	XDH	Xanthine dehydrogenase/oxidase	P80457	ENSCINP00000031513.1	GO:0003824 GO:0004854 GO:0005506 GO:0005829 GO:0009055 GO:0009115 GO:0016491 GO:0016614 GO:0016903 GO:0046872 GO:0050660 GO:0051536 GO:0055114
AIPGENE11300	XLRS1	Retinoschisin	Q9W6R5	ENSCINP00000019787.3
AIPGENE20620	ZSWM3	Zinc finger SWIM domain-containing protein 3	Q8CFL8	ENSCINP00000016654.3	GO:0003677 GO:0003700 GO:0005634 GO:0006355 GO:0006366 GO:0008270 GO:0071277
AIPGENE10406	Predicted protein	Predicted protein	A0A096M4T5
AIPGENE10918	Predicted protein	Predicted protein	A7S1V5
AIPGENE11265	Predicted Protein	Predicted Protein
AIPGENE11357	Predicted protein	Predicted protein	A7SUN8
AIPGENE12057	Predicted Protein	Predicted Protein
AIPGENE12101	Predicted protein	Predicted protein	A7RUA0	ENSCINP00000032263.1
AIPGENE14041	Predicted Protein	Predicted Protein
AIPGENE14493	Predicted Protein	Predicted Protein
AIPGENE16517	Predicted protein	Predicted protein	A7RQD5
AIPGENE16818	Predicted protein	Predicted protein	A7T0C9
AIPGENE17124	Predicted Protein	Predicted Protein
AIPGENE17166	Predicted Protein	Predicted Protein
AIPGENE17272	Predicted protein	Predicted protein	C3ZUM2
AIPGENE17491	Predicted protein	Predicted protein	T1J4M1
AIPGENE18008	Predicted Protein	Predicted Protein
AIPGENE18011	Predicted Protein	Predicted Protein
AIPGENE18035	Predicted Protein	Predicted Protein
AIPGENE19135	Predicted protein	Predicted protein	R7TT16
AIPGENE19608	Predicted protein	Predicted protein	C3ZHH9
AIPGENE19944	Predicted Protein	Predicted Protein
AIPGENE20050	Predicted Protein	Predicted Protein
AIPGENE20128	Predicted Protein	Predicted Protein
AIPGENE2077	Predicted protein	Predicted protein	A7RQH4
AIPGENE21447	Predicted Protein	Predicted Protein
AIPGENE21467	Predicted Protein	Predicted Protein
AIPGENE21580	Predicted protein	Predicted protein	C3ZYA3
AIPGENE23948	Predicted Protein	Predicted Protein
AIPGENE2407	Predicted protein	Predicted protein	A7SZH2
AIPGENE25323	Predicted protein	Predicted protein	A7RHU0
AIPGENE25330	Predicted Protein	Predicted Protein
AIPGENE26379	Predicted protein	Predicted protein	A7SH51
AIPGENE26964	Predicted Protein	Predicted Protein
AIPGENE27013	Predicted protein	Predicted protein	A7SA71
AIPGENE28315	Predicted protein	Predicted protein	W4XQ99
AIPGENE28481	Predicted protein	Predicted protein	A7RQ30	ENSCINP00000005729.3	GO:0005737 GO:0006629 GO:0016020 GO:0016021 GO:0016627 GO:0055114
AIPGENE28909	Predicted Protein	Predicted Protein
AIPGENE29055	Predicted Protein	Predicted Protein
AIPGENE3576	Predicted protein	Predicted protein	A7S714	ENSCINP00000001358.3	GO:0016020 GO:0016021
AIPGENE5067	Predicted protein	Predicted protein	A0A015J949	ENSCINP00000034291.1
AIPGENE6555	Predicted protein	Predicted protein	Q110F0
AIPGENE6567	Predicted protein	Predicted protein	A7SUI3
AIPGENE6793	Predicted protein	Predicted protein	A7RZH9
AIPGENE6924	Predicted Protein	Predicted Protein
AIPGENE72	Predicted Protein	Predicted Protein
AIPGENE8511	Predicted protein	Predicted protein	I3KX76
AIPGENE8559	Predicted Protein	Predicted Protein
AIPGENE9347	Predicted Protein	Predicted Protein
AIPGENE9410	Predicted protein	Predicted protein	A0A096M4T5

## Sheet: Table S2. sym_specificDEGs
E. diaphana geneID	Gene name	Discription	UniprotID	C. intestinalis geneID	GOID
AIPGENE11786	4CL1	4-coumarate--CoA ligase 1	O24145	ENSCINP00000036514.1	GO:0003824 GO:0008152
AIPGENE527	5HT6R	5-hydroxytryptamine receptor 6	P31388	ENSCINP00000015775.3
AIPGENE24100	6PGD	6-phosphogluconate dehydrogenase, decarboxylating	P52209	ENSCINP00000031881.1	GO:0004616 GO:0055114
AIPGENE22099	AASS	Alpha-aminoadipic semialdehyde synthase, mitochondrial	A8E657	ENSCINP00000019576.3	GO:0016491 GO:0055114
AIPGENE20833	ABCG4	ATP-binding cassette sub-family G member 4	Q9H172	ENSCINP00000016671.3	GO:0000166 GO:0005524 GO:0005886 GO:0015918 GO:0016020 GO:0016021 GO:0016887 GO:0017127 GO:0030301 GO:0034041
AIPGENE2778	ABHD5	1-acylglycerol-3-phosphate O-acyltransferase ABHD5	Q9DBL9	ENSCINP00000019002.3	GO:0003824 GO:0016787
AIPGENE11605	ACAC	Acetyl-CoA carboxylase	P11029	ENSCINP00000005865.3	GO:0000166 GO:0003824 GO:0003989 GO:0004075 GO:0005524 GO:0006633 GO:0016874 GO:0046872
AIPGENE13427	ACADM	Medium-chain specific acyl-CoA dehydrogenase, mitochondrial	Q3SZB4	ENSCINP00000030042.1	GO:0000062 GO:0003995 GO:0005739 GO:0008152 GO:0008470 GO:0009055 GO:0016491 GO:0016627 GO:0033539 GO:0050660 GO:0052890 GO:0055088 GO:0055114
AIPGENE17854	ACEA	Isocitrate lyase	Q9K9H0
AIPGENE18437	ACES	Acetylcholinesterase	Q92035	ENSCINP00000031848.1
AIPGENE18552	ACES	Acetylcholinesterase	P22303	ENSCINP00000035547.1	GO:0016787
AIPGENE983	ACES	Acetylcholinesterase	Q92035	ENSCINP00000009596.3	GO:0004104 GO:0005615 GO:0016787 GO:0052689
AIPGENE20290	ACOD	Acyl-CoA desaturase	O62849	ENSCINP00000033408.1
AIPGENE1750	ACOT4	Acyl-coenzyme A thioesterase 4	Q8BWN8	ENSCINP00000025919.2	GO:0006637 GO:0016790
AIPGENE12816	ACTB	Actin, cytoplasmic 1	P15475	ENSCINP00000001538.3	GO:0000166 GO:0005524
AIPGENE12775	ACTC	Actin, cytoplasmic	P12716	ENSCINP00000001538.3	GO:0000166 GO:0005524
AIPGENE2600	ACTP2	Equinatoxin-2	P61914
AIPGENE2697	ACTP2	Equinatoxin-2	P61914
AIPGENE2649	ACTPC	Tenebrosin-C	P61915
AIPGENE19049	AEBP1	Adipocyte enhancer-binding protein 1	Q640N1	ENSCINP00000019787.3
AIPGENE25748	AGRD1	Adhesion G-protein coupled receptor D1	A6QLU6	ENSCINP00000011544.3	GO:0004871 GO:0004888 GO:0004930 GO:0005509 GO:0005886 GO:0007155 GO:0007156 GO:0007165 GO:0007166 GO:0007186 GO:0016020 GO:0016021
AIPGENE20632	AGRIN	Agrin	P25304	ENSCINP00000024218.2	GO:0016020 GO:0016021
AIPGENE19640	AL3B1	Aldehyde dehydrogenase family 3 member B1	P43353	ENSCINP00000001020.3	GO:0004028 GO:0004029 GO:0004030 GO:0006081 GO:0008152 GO:0016491 GO:0016620 GO:0055114
AIPGENE4065	AMDA	Peptidyl-glycine alpha-amidating monooxygenase A	P08478	ENSCINP00000018020.4	GO:0003824 GO:0004497 GO:0005507 GO:0006518 GO:0016020 GO:0016715 GO:0055114
AIPGENE5791	AMID	Amidase	P95896	ENSCINP00000027138.2	GO:0016884
AIPGENE28006	ANAG	Alpha-N-acetylglucosaminidase	P54802	ENSCINP00000024455.2
AIPGENE23315	AOSL	Allene oxide synthase-lipoxygenase protein	O16025	ENSCINP00000033534.1	GO:0016491 GO:0016702 GO:0046872 GO:0051213 GO:0055114
AIPGENE5921	ARF1	ADP-ribosylation factor 1	P61210	ENSCINP00000035274.1
AIPGENE18609	ARID2	AT-rich interactive domain-containing protein 2	Q68CP9	ENSCINP00000013045.3	GO:0001664 GO:0005737 GO:0005764 GO:0006629 GO:0006665 GO:0008047 GO:0043085
AIPGENE6303	ARSB	Arylsulfatase B	P15848	ENSCINP00000007178.3	GO:0003824 GO:0008152 GO:0008484
AIPGENE6329	ARSB	Arylsulfatase B	P33727	ENSCINP00000007178.3	GO:0003824 GO:0008152 GO:0008484
AIPGENE12193	ATHL1	Acid trehalase-like protein 1	Q8BP56	ENSCINP00000036547.1	GO:0003824 GO:0005618 GO:0005975 GO:0016787
AIPGENE18100	ATS18	A disintegrin and metalloproteinase with thrombospondin motifs 18	Q8TE60	ENSCINP00000018188.3	GO:0004222 GO:0005578 GO:0006508 GO:0008237 GO:0008270 GO:0031012
AIPGENE19799	ATS6	A disintegrin and metalloproteinase with thrombospondin motifs 6	Q9UKP5	ENSCINP00000014955.3	GO:0004222 GO:0005578 GO:0006508 GO:0008233 GO:0008237 GO:0008270 GO:0031012
AIPGENE7831	ATS6	A disintegrin and metalloproteinase with thrombospondin motifs 6	Q9UKP5	ENSCINP00000014955.3	GO:0004222 GO:0005578 GO:0006508 GO:0008233 GO:0008237 GO:0008270 GO:0031012
AIPGENE3413	ATS7	disintegrin and metalloproteinase with thrombospondin motifs 7	Q1EHB3	ENSCINP00000030146.1
AIPGENE3533	ATTY	Tyrosine aminotransferase	Q8QZR1	ENSCINP00000000577.3	GO:0003824 GO:0004838 GO:0006520 GO:0008483 GO:0009058 GO:0009072 GO:0030170
AIPGENE20839	B4GN3	Beta-1,4-N-acetylgalactosaminyltransferase 3	Q6L9W6	ENSCINP00000028502.2	GO:0008376 GO:0032580
AIPGENE14704	BACE	Beta-secretase	W8W138	ENSCINP00000008898.3	GO:0004190 GO:0006508 GO:0008233 GO:0016020 GO:0016021 GO:0016787 GO:0030163
AIPGENE991	BAI3	Brain-specific angiogenesis inhibitor 3	Q80ZF8	ENSCINP00000015858.3	GO:0005509
AIPGENE18881	BAMT	Benzoate carboxyl methyltransferase	Q9FYZ9
AIPGENE12883	BARH1	BarH-like 1 homeobox protein	Q9BZE3	ENSCINP00000024460.2	GO:0003677 GO:0005634 GO:0006355 GO:0043565
AIPGENE10563	BAT38	BTB and MATH domain-containing protein 38	Q20681	ENSCINP00000033484.1	GO:0004842 GO:0016567 GO:0031463
AIPGENE1323	BCAS3	Breast carcinoma-amplified sequence 3 homolog	Q8CCN5	ENSCINP00000024644.2
AIPGENE13568	BDH2	3-hydroxybutyrate dehydrogenase type 2	Q3T046	ENSCINP00000003163.3	GO:0003858 GO:0019290 GO:0055072 GO:0055114
AIPGENE9338	BGLR	Beta-glucuronidase	O97524	ENSCINP00000032126.1	GO:0004553 GO:0004566 GO:0005764 GO:0005975 GO:0008152 GO:0016020 GO:0016021 GO:0016787 GO:0016798
AIPGENE9365	BGLR	Beta-glucuronidase	Q4FAT7	ENSCINP00000010614.3	GO:0004553 GO:0004566 GO:0005764 GO:0005975 GO:0008152 GO:0016787 GO:0016798 GO:0043231
AIPGENE27531	BHMT1	Betaine--homocysteine S-methyltransferase 1	Q5M8Z0	ENSCINP00000015488.3	GO:0005737 GO:0005829 GO:0008270 GO:0008898 GO:0009086 GO:0032259 GO:0046872 GO:0047150
AIPGENE1836	BPI	Bactericidal permeability-increasing protein	P17213	ENSCINP00000033806.1
AIPGENE28055	BTN1	Protein BTN1	Q6CLN9
AIPGENE8360	C1T9B	Complement C1q and tumor necrosis factor-related protein 9B	B2RNN3	ENSCINP00000032147.1
AIPGENE2901	CAH2	Carbonic anhydrase 2	Q8UWA5	ENSCINP00000003284.3	GO:0004089 GO:0006730 GO:0008270 GO:0046872
AIPGENE11652	CALUA	Calumenin-A	B5X186	ENSCINP00000025165.2	GO:0005509
AIPGENE18736	CAN8	Calpain-8	Q91VA3	ENSCINP00000015502.3
AIPGENE24429	CAS4	Short-chain collagen C4 (Fragment)	P18503	ENSCINP00000032915.1	GO:0016020 GO:0016021
AIPGENE24564	CAS4	Short-chain collagen C4 (Fragment)	P18503	ENSCINP00000032915.1	GO:0016020 GO:0016021
AIPGENE22675	CASR	Extracellular calcium-sensing receptor	P35384	ENSCINP00000004243.3	GO:0004871 GO:0004930 GO:0005886 GO:0007165 GO:0007186 GO:0016020 GO:0016021
AIPGENE16849	CATB	Cathepsin B	A1E295	ENSCINP00000031460.1	GO:0004197 GO:0005615 GO:0005764 GO:0006508 GO:0008234 GO:0050790 GO:0051603
AIPGENE26156	CATL	Cathepsin L	Q26636	ENSCINP00000015731.3	GO:0004197 GO:0005615 GO:0005764 GO:0006508 GO:0008233 GO:0008234 GO:0016787 GO:0051603
AIPGENE8126	CC125	Coiled-coil domain-containing protein 125	Q5U465
AIPGENE128	CC134	Coiled-coil domain-containing protein 134	Q9H6E4	ENSCINP00000021785.2
AIPGENE22347	CD033	UPF0462 protein C4orf33	Q8N1A6	ENSCINP00000032660.1
AIPGENE13459	CD36	Platelet glycoprotein 4	P70110	ENSCINP00000011713.3	GO:0004872 GO:0005764 GO:0016020 GO:0016021
AIPGENE1298	CD63	CD63 antigen	Q76B49	ENSCINP00000031139.1
AIPGENE24299	CDAC1	Cytidine and dCMP deaminase domain-containing protein 1	Q9BWV3	ENSCINP00000026466.2	GO:0003824 GO:0004132 GO:0006220 GO:0008270 GO:0016787 GO:0046872
AIPGENE3703	CDCP2	CUB domain-containing protein 2	Q5VXM1	ENSCINP00000032546.1
AIPGENE1271	CFAD	Counting factor associated protein D	Q54TR1	ENSCINP00000015736.3	GO:0004197 GO:0005615 GO:0005764 GO:0006508 GO:0008234 GO:0051603
AIPGENE15465	CGAS	Cyclic GMP-AMP synthase	I3LM39	ENSCINP00000021875.2
AIPGENE11370	CGL	Cystathionine gamma-lyase	Q55DV9	ENSCINP00000025947.2	GO:0003824 GO:0030170
AIPGENE510	CGL	Cystathionine gamma-lyase	Q58DW2	ENSCINP00000025947.2	GO:0003824 GO:0030170
AIPGENE7524	CGT	2-hydroxyacylsphingosine 1-beta-galactosyltransferase	Q16880
AIPGENE28896	CHDH	Choline dehydrogenase, mitochondrial	Q8BJ64	ENSCINP00000007524.3	GO:0008812 GO:0016491 GO:0016614 GO:0019285 GO:0050660 GO:0055114
AIPGENE3160	CHST1	Carbohydrate sulfotransferase 1	Q6DBY9	ENSCINP00000022864.2	GO:0001517 GO:0006790 GO:0008146 GO:0016021 GO:0016740
AIPGENE22861	CKAP5	Cytoskeleton-associated protein 5	Q14008	ENSCINP00000015580.3
AIPGENE22622	CLIC4	Chloride intracellular channel protein 4	Q5R957	ENSCINP00000009622.3	GO:0005254 GO:0005634 GO:0005737 GO:0050780 GO:1902476
AIPGENE7759	CNG	Cyclic nucleotide-gated cation channel	P55934	ENSCINP00000014322.3	GO:0005216 GO:0005249 GO:0005887 GO:0006810 GO:0006811 GO:0006813 GO:0016020 GO:0016021 GO:0034220 GO:0042391 GO:0055085 GO:0071805
AIPGENE4172	CNN1	Calponin-1	P26932	ENSCINP00000024676.2	GO:0003779 GO:0005516 GO:0031032
AIPGENE20994	CNR2	Cannabinoid receptor 2	P47936	ENSCINP00000008927.3	GO:0004930 GO:0005887 GO:0007166 GO:0007186 GO:0016020 GO:0016021
AIPGENE10422	CO4A1	Collagen alpha-1(IV) chain	P08120	ENSCINP00000016017.3
AIPGENE10546	CO4A2	Collagen alpha-2(IV) chain	P27393	ENSCINP00000016093.3	GO:0005201 GO:0005578 GO:0005581
AIPGENE25153	CO6A5	Collagen alpha-5(VI) chain	A6H584	ENSCINP00000001942.3	GO:0005509
AIPGENE14423	CO7A1	Collagen alpha-1(VII) chain	Q63870	ENSCINP00000017737.3	GO:0004867 GO:0010951
AIPGENE14130	COLA1	Collagen alpha-1(XXI) chain	Q96P44	ENSCINP00000016093.3	GO:0005201 GO:0005578 GO:0005581
AIPGENE19050	COLA1	Collagen alpha-1(XXI) chain	Q96P44	ENSCINP00000016017.3
AIPGENE4529	COLL2	Collagen-like protein 2	Q5UQ13	ENSCINP00000017221.3
AIPGENE20999	COLL6	Collagen-like protein 6	Q5UQ50	ENSCINP00000001599.3
AIPGENE15090	COLQ	Acetylcholinesterase collagenic tail peptide	Q03637	ENSCINP00000014311.3	GO:0005201 GO:0005581
AIPGENE1629	COTL1	Coactosin-like protein	Q2HJ57	ENSCINP00000017953.3
AIPGENE23049	CP17A	Steroid 17-alpha-hydroxylase/17,20 lyase	O73853	ENSCINP00000019654.3	GO:0004497 GO:0005506 GO:0008395 GO:0016020 GO:0016021 GO:0016491 GO:0016705 GO:0020037 GO:0046872 GO:0055114
AIPGENE23070	CP17A	Steroid 17-alpha-hydroxylase/17,20 lyase	O73853	ENSCINP00000022528.2
AIPGENE23109	CP17A	Steroid 17-alpha-hydroxylase/17,20 lyase	O73853	ENSCINP00000018706.3
AIPGENE27064	CP1A1	Cytochrome P450 1A1	O42457	ENSCINP00000012842.3	GO:0004497 GO:0005506 GO:0016020 GO:0016021 GO:0016491 GO:0016705 GO:0020037 GO:0043231 GO:0046872 GO:0055114
AIPGENE5640	CP24A	1,25-dihydroxyvitamin D(3) 24-hydroxylase, mitochondrial	Q64441	ENSCINP00000033359.1
AIPGENE27007	CP3AO	Cytochrome P450 3A24	Q29496	ENSCINP00000036138.1
AIPGENE28157	CPSM	Carbamoyl-phosphate synthase [ammonia], mitochondrial	P31327	ENSCINP00000018277.3	GO:0000050 GO:0003824 GO:0004070 GO:0004087 GO:0004088 GO:0004151 GO:0005524 GO:0005737 GO:0006207 GO:0006526 GO:0006807 GO:0046872
AIPGENE21331	CPT1A	Carnitine O-palmitoyltransferase 1, liver isoform	P50416	ENSCINP00000007072.3	GO:0016020 GO:0016021 GO:0016746
AIPGENE13554	CREA	Creatinase	P38487
AIPGENE26823	CTHR1	Collagen triple helix repeat-containing protein 1	Q96CG8	ENSCINP00000015636.3
AIPGENE13178	CTP5A	Contactin-associated protein like 5-1	Q0V8T9	ENSCINP00000010540.3
AIPGENE24260	CTRB	Chymotrypsin B	P80646	ENSCINP00000029043.2	GO:0004252 GO:0006508 GO:0008233 GO:0008236 GO:0016787
AIPGENE5888	CTRB	Chymotrypsinogen B	P00767	ENSCINP00000031261.1	GO:0004252 GO:0006508 GO:0008233 GO:0008236 GO:0016787
AIPGENE6698	CTRB2	Chymotrypsinogen B2	Q6GPI1	ENSCINP00000029043.2	GO:0004252 GO:0006508 GO:0008233 GO:0008236 GO:0016787
AIPGENE10951	CTX1	Toxin CrTX-A	Q9GV72
AIPGENE17825	CTX1	Toxin CrTX-A	Q9GV72
AIPGENE17834	CTX1	Toxin CrTX-A	Q9GV72
AIPGENE17675	CTXA	Toxin CaTX-A	Q9GNN8
AIPGENE13588	CUBN	Cubilin	O70244	ENSCINP00000007799.3	GO:0004222 GO:0005509 GO:0006508 GO:0008233 GO:0008237 GO:0008270 GO:0016787 GO:0046872
AIPGENE5556	CYS2	Probable serine-O-acetyltransferase cys2	Q10341	ENSCINP00000033915.1	GO:0009001 GO:0016787 GO:0019344
AIPGENE22204	CYSP	Cathepsin B-like cysteine proteinase	P25792	ENSCINP00000019058.3	GO:0004177 GO:0004197 GO:0005615 GO:0005764 GO:0006508 GO:0006919 GO:0006955 GO:0008233 GO:0008234 GO:0008656 GO:0010952 GO:0016787 GO:0051603 GO:2001235
AIPGENE26801	DEFM	Peptide deformylase, mitochondrial	Q9HBH1
AIPGENE6491	DHCR7	7-dehydrocholesterol reductase	Q7SXF1	ENSCINP00000014788.3	GO:0006695 GO:0016020 GO:0016021 GO:0016628 GO:0030176 GO:0047598 GO:0055114
AIPGENE24026	DHE3	Glutamate dehydrogenase	P94598	ENSCINP00000019611.3	GO:0006520 GO:0016491 GO:0016639 GO:0055114
AIPGENE27618	DHE3	Glutamate dehydrogenase	P94598	ENSCINP00000019611.3	GO:0006520 GO:0016491 GO:0016639 GO:0055114
AIPGENE25704	DIAC	Di-N-acetylchitobiase	Q01459	ENSCINP00000035855.1
AIPGENE20433	DIRA2	GTP-binding protein Di-Ras2	Q5R6S2	ENSCINP00000015095.3	GO:0000166 GO:0005525 GO:0005622 GO:0007165 GO:0007264 GO:0016020
AIPGENE20966	DIRC2	Disrupted in renal carcinoma protein 2 homolog	Q6GNV7	ENSCINP00000023309.2
AIPGENE15640	DMBT1	Deleted in malignant brain tumors 1 protein	Q9UGM3	ENSCINP00000015917.3	GO:0004252 GO:0006508 GO:0008233 GO:0008236 GO:0016787
AIPGENE5579	DNAJ1	DnaJ protein homolog 1	Q24133	ENSCINP00000012873.3	GO:0006457 GO:0051082
AIPGENE26101	DNJB4	DnaJ homolog subfamily B member 4	Q2KIT4	ENSCINP00000002844.3	GO:0006457 GO:0051082
AIPGENE3208	DPF1	Zinc finger protein neuro-d4	Q9QX66	ENSCINP00000033757.1	GO:0008270 GO:0046872
AIPGENE17142	DPP2	Dipeptidyl peptidase 2	Q9EPB1	ENSCINP00000014279.3	GO:0004185 GO:0006508 GO:0008236 GO:0008239 GO:0031982
AIPGENE24798	DRD2B	D(2) dopamine receptor B (Fragment)	P34973
AIPGENE3939	DSCAM	Down syndrome cell adhesion molecule	O60469	ENSCINP00000015860.3	GO:0005509
AIPGENE29265	DTX3L	E3 ubiquitin-protein ligase DTX3L	Q8TDB6	ENSCINP00000006511.3	GO:0008270 GO:0046872
AIPGENE24155	DYH3	Dynein heavy chain 3, axonemal	Q8BW94	ENSCINP00000031667.1	GO:0003777 GO:0007018
AIPGENE12845	ECE1	Endothelin-converting enzyme 1	P42893	ENSCINP00000011815.3	GO:0004222 GO:0006508 GO:0008237
AIPGENE8891	EDIL3	EGF-like repeat and discoidin I-like domain-containing protein 3	O35474	ENSCINP00000006532.3	GO:0005509
AIPGENE25107	EIF2A	Eukaryotic translation initiation factor 2A	Q4QRJ7	ENSCINP00000005103.3	GO:0003743 GO:0006412 GO:0006413
AIPGENE8234	EIF3D	Eukaryotic translation initiation factor 3 subunit D	A7SMR1	ENSCINP00000008206.1
AIPGENE10025	ELOV4	Elongation of very long chain fatty acids protein 4	Q9GZR5	ENSCINP00000018836.3	GO:0006629 GO:0006631 GO:0006633 GO:0016020 GO:0016021 GO:0016740
AIPGENE24295	EMX1	Homeobox protein EMX1	Q04741	ENSCINP00000036336.1	GO:0003677 GO:0005634 GO:0006355 GO:0043565
AIPGENE14033	ENOX1	Ecto-NOX disulfide-thiol exchanger 1	Q8TC92
AIPGENE25794	ENOX1	Ecto-NOX disulfide-thiol exchanger 1	Q8TC92
AIPGENE3034	EPDR1	Mammalian ependymin-related protein 1	Q9N0C7	ENSCINP00000015708.3	GO:0005509 GO:0005576 GO:0007160
AIPGENE14889	EPHB2	Ephrin type-B receptor 2	P54763	ENSCINP00000002487.3	GO:0000166 GO:0004672 GO:0004713 GO:0005003 GO:0005524 GO:0005887 GO:0006468 GO:0007169 GO:0016020 GO:0016021 GO:0016301 GO:0016310 GO:0016740 GO:0018108 GO:0048013
AIPGENE8576	EPHB2	Ephrin type-B receptor 2	P54763	ENSCINP00000002487.3	GO:0000166 GO:0004672 GO:0004713 GO:0005003 GO:0005524 GO:0005887 GO:0006468 GO:0007169 GO:0016020 GO:0016021 GO:0016301 GO:0016310 GO:0016740 GO:0018108 GO:0048013
AIPGENE20366	EQST	Equistatin	P81439	ENSCINP00000020167.3
AIPGENE26107	ERI2	ERI1 exoribonuclease 2	A8K979	ENSCINP00000012755.3	GO:0000467 GO:0003676
AIPGENE18149	ERMP1	Endoplasmic reticulum metallopeptidase 1	Q3UVK0	ENSCINP00000035901.1	GO:0016020 GO:0016021
AIPGENE391	ERP44	Endoplasmic reticulum resident protein 44	Q9D1Q6	ENSCINP00000002784.3	GO:0003756 GO:0005783 GO:0006457 GO:0034976 GO:0045454
AIPGENE20815	FA26F	Protein FAM26F	Q8C9E8	ENSCINP00000007979.3	GO:0005261 GO:0005887 GO:0016020 GO:0016021 GO:0034220 GO:0098655
AIPGENE19098	FA46C	Protein FAM46C	Q7ZUP1	ENSCINP00000026866.2
AIPGENE26056	FAAH	Fatty acid amide hydrolase	Q7XJJ7	ENSCINP00000014515.3
AIPGENE11624	FABG	3-oxoacyl-[acyl-carrier-protein] reductase FabG	Q9X248	ENSCINP00000020171.3
AIPGENE14819	FAD5	Delta(5) fatty acid desaturase	O74212	ENSCINP00000004431.3	GO:0016020 GO:0016021 GO:0020037 GO:0046872
AIPGENE17789	FAMT	Probable fatty acid methyltransferase Rv3720	O69687
AIPGENE8227	FAS	Fatty acid synthase	P12785	ENSCINP00000036430.1	GO:0003824 GO:0008152 GO:0009058 GO:0016491 GO:0016740 GO:0016788 GO:0055114
AIPGENE11718	FAXC	Failed axon connections homolog	F7E235	ENSCINP00000025230.2	GO:0004364 GO:0005737 GO:0006749
AIPGENE4649	FB252	F-box protein At5g06550	Q67XX3	ENSCINP00000015483.3
AIPGENE18349	FBN1	Fibrillin-1	P35555	ENSCINP00000010385.3	GO:0005201 GO:0005509 GO:0005578
AIPGENE8199	FBN1	Fibrillin-1	P98133	ENSCINP00000010391.3	GO:0005201 GO:0005509 GO:0005578
AIPGENE11705	FBN2	Fibrillin-2	P35556	ENSCINP00000010391.3	GO:0005201 GO:0005509 GO:0005578
AIPGENE11707	FBN2	Fibrillin-2	P35556	ENSCINP00000010391.3	GO:0005201 GO:0005509 GO:0005578
AIPGENE13620	FBN2	Fibrillin-2	P35556	ENSCINP00000010391.3	GO:0005201 GO:0005509 GO:0005578
AIPGENE27824	FBP1	Fibropellin-1	P10079	ENSCINP00000014588.3
AIPGENE26088	FGF1	Fibroblast growth factor 1 (Fragment)	Q7SIF8	ENSCINP00000032792.1	GO:0008083
AIPGENE1796	FGFR	Fibroblast growth factor receptor	Q4H3K6	ENSCINP00000001598.3	GO:0004672 GO:0004713 GO:0005007 GO:0005524 GO:0006468 GO:0008284 GO:0008543 GO:0016020 GO:0016021 GO:0018108
AIPGENE4615	FGFR	Fibroblast growth factor receptor	Q86PM4	ENSCINP00000026874.2
AIPGENE16047	FGFR1	Fibroblast growth factor receptor 1	P22182	ENSCINP00000001598.3	GO:0004672 GO:0004713 GO:0005007 GO:0005524 GO:0006468 GO:0008284 GO:0008543 GO:0016020 GO:0016021 GO:0018108
AIPGENE22541	FGFR2	Fibroblast growth factor receptor 2	Q91286	ENSCINP00000001598.3	GO:0004672 GO:0004713 GO:0005007 GO:0005524 GO:0006468 GO:0008284 GO:0008543 GO:0016020 GO:0016021 GO:0018108
AIPGENE7347	FGFR4	Fibroblast growth factor receptor 4	Q90330	ENSCINP00000001598.3	GO:0004672 GO:0004713 GO:0005007 GO:0005524 GO:0006468 GO:0008284 GO:0008543 GO:0016020 GO:0016021 GO:0018108
AIPGENE3281	FKBP4	46 kDa FK506-binding nuclear protein	Q26486
AIPGENE12192	FMO2	Dimethylaniline monooxygenase [N-oxide-forming] 2	Q8HZ70	ENSCINP00000011417.3	GO:0004497 GO:0004499 GO:0005783 GO:0005789 GO:0016020 GO:0016021 GO:0016491 GO:0017144 GO:0031090 GO:0043231 GO:0050660 GO:0050661 GO:0055114
AIPGENE21768	FMO5	Dimethylaniline monooxygenase [N-oxide-forming] 5	Q8K4C0	ENSCINP00000011417.3	GO:0004497 GO:0004499 GO:0005783 GO:0005789 GO:0016020 GO:0016021 GO:0016491 GO:0017144 GO:0031090 GO:0043231 GO:0050660 GO:0050661 GO:0055114
AIPGENE5457	FOLH1	Glutamate carboxypeptidase 2	P70627	ENSCINP00000011038.3	GO:0016020 GO:0016021
AIPGENE13402	FOSX	Transforming protein v-Fos/v-Fox	P29176	ENSCINP00000034304.1
AIPGENE3308	FOSX	Transforming protein v-Fos/v-Fox	P29176	ENSCINP00000005786.3	GO:0000978 GO:0000982 GO:0003677 GO:0003700 GO:0005634 GO:0006355 GO:0006357 GO:0043565
AIPGENE26282	FOXO	Forkhead box protein O	O16850	ENSCINP00000035316.1	GO:0003677 GO:0003700 GO:0005634 GO:0006351 GO:0006355 GO:0043565
AIPGENE20026	FRIS	Soma ferritin	P42577	ENSCINP00000035294.1
AIPGENE14754	FRRS1	Putative ferric-chelate reductase 1	Q6INU7	ENSCINP00000017029.3
AIPGENE563	FRRS1	Ferric-chelate reductase 1	Q8K385	ENSCINP00000017029.3
AIPGENE9887	FSTL5	Follistatin-related protein 5	Q8N475	ENSCINP00000025719.2
AIPGENE14536	FUCO_BRAFL	Alpha-L-fucosidase2	C3YWU0	ENSCINP00000006232.3	GO:0004560 GO:0005975 GO:0006004
AIPGENE16012	FUCO_BRAFL	Alpha-L-fucosidase2	C3YWU0	ENSCINP00000015524.3
AIPGENE24268	FUCO_BRAFL	Alpha-L-fucosidase2	C3YWU0	ENSCINP00000015524.3
AIPGENE15521	FXDC2	Fatty acid hydroxylase domain-containing protein 2	Q96IV6	ENSCINP00000010642.3	GO:0005506 GO:0006633 GO:0016020 GO:0016021 GO:0016491 GO:0055114
AIPGENE12778	GALK1	Galactokinase	P51570	ENSCINP00000010220.3	GO:0000166 GO:0004335 GO:0005524 GO:0005737 GO:0006012 GO:0008152 GO:0016301 GO:0016310 GO:0016740 GO:0016773 GO:0046835
AIPGENE10000	GALK2	N-acetylgalactosamine kinase	Q5XIG6	ENSCINP00000028204.2	GO:0000166 GO:0004335 GO:0005524 GO:0005737 GO:0006012 GO:0008152 GO:0016301 GO:0016310 GO:0016740 GO:0016773 GO:0046835
AIPGENE15776	GAPR1	Golgi-associated plant pathogenesis-related protein 1	Q9CYL5	ENSCINP00000001814.3	GO:0005576
AIPGENE17511	GAPR1	Golgi-associated plant pathogenesis-related protein 1	Q9CYL5	ENSCINP00000001814.3	GO:0005576
AIPGENE1512	GBA3	Cytosolic beta-glucosidase	Q5RF65	ENSCINP00000010342.3	GO:0004553 GO:0005975 GO:0008422 GO:1901657
AIPGENE1160	GBP3	Guanylate-binding protein 3	Q9H0R5	ENSCINP00000032288.1
AIPGENE23318	GBP5	Guanylate-binding protein 5	Q8CFB4
AIPGENE5337	GCNT4	Beta-1,3-galactosyl-O-glycosyl-glycoprotein beta-1,6-N-acetylglucosaminyltransferase 4	Q71SG7	ENSCINP00000024350.2
AIPGENE6070	GDF11	Growth/differentiation factor 11	Q9Z1W4	ENSCINP00000010102.3	GO:0005125 GO:0005160 GO:0005576 GO:0005615 GO:0008083 GO:0010862 GO:0030509 GO:0040007 GO:0042981 GO:0043408 GO:0048468 GO:0060395
AIPGENE23694	GGLO	L-gulonolactone oxidase	P58710
AIPGENE9468	GGT	Gamma-glutamyltranspeptidase	P54422	ENSCINP00000001002.3	GO:0003840 GO:0006749
AIPGENE8953	GLHR	Probable glycoprotein hormone G-protein coupled receptor	P35409	ENSCINP00000030027.1	GO:0004930 GO:0005887 GO:0007186 GO:0007189 GO:0007190 GO:0008528 GO:0009755 GO:0016020 GO:0016021 GO:0016500
AIPGENE5590	GLI1	Zinc finger protein GLI1 (Fragment)	P55878	ENSCINP00000022660.2	GO:0003676 GO:0006355 GO:0007224 GO:0035301 GO:0046872
AIPGENE3097	GNPAT	Dihydroxyacetone phosphate acyltransferase	O15228	ENSCINP00000018520.3	GO:0008152 GO:0008374 GO:0016746 GO:0044255
AIPGENE182	GNS	N-acetylglucosamine-6-sulfatase	P50426	ENSCINP00000019163.3
AIPGENE5134	GPSM2	G-protein-signaling modulator 2	P81274	ENSCINP00000018424.3
AIPGENE26885	GPX1	Glutathione peroxidase 1	P11352	ENSCINP00000002066.3	GO:0004601 GO:0004602 GO:0006979 GO:0016491 GO:0055114 GO:0098869
AIPGENE1907	GRM8	Metabotropic glutamate receptor 8	P47743	ENSCINP00000025414.2
AIPGENE14421	GRN	Granulins	P23785	ENSCINP00000023895.2
AIPGENE26283	GRP10	Glycine-rich RNA-binding protein 10	Q05966	ENSCINP00000031642.1
AIPGENE20480	GST	Glutathione S-transferase	P46428	ENSCINP00000000153.3
AIPGENE2706	GTR8	Solute carrier family 2, facilitated glucose transporter member 8	Q9NY64	ENSCINP00000002435.3	GO:0005215 GO:0005351 GO:0005355 GO:0005887 GO:0006810 GO:0015992 GO:0016020 GO:0016021 GO:0022857 GO:0022891 GO:0035428 GO:0046323 GO:0055085 GO:1904659
AIPGENE6170	GTR8	Solute carrier family 2, facilitated glucose transporter member 8	Q9JJZ1	ENSCINP00000019539.3	GO:0005351 GO:0005355 GO:0005887 GO:0006810 GO:0015992 GO:0016020 GO:0016021 GO:0022857 GO:0022891 GO:0035428 GO:0046323 GO:0055085 GO:1904659
AIPGENE1127	H17B6	17-beta-hydroxysteroid dehydrogenase type 6	Q3T001	ENSCINP00000015221.3
AIPGENE15940	HBP1	HMG box-containing protein 1	Q2KJ34	ENSCINP00000015677.3	GO:0000122 GO:0005634
AIPGENE25956	HEBP2	Heme-binding protein 2	Q9WU63	ENSCINP00000019979.3
AIPGENE25995	HEBP2	Heme-binding protein 2	Q9WU63	ENSCINP00000003777.3
AIPGENE16319	HEMH	Ferrochelatase, mitochondrial	O57478
AIPGENE20289	HEX	Beta-hexosaminidase	Q04786	ENSCINP00000008969.3	GO:0004553 GO:0004563 GO:0005975
AIPGENE546	HMCN1	Hemicentin-1	Q96RW7	ENSCINP00000015858.3	GO:0005509
AIPGENE16615	HMCN2	Hemicentin-2	A2AJ76	ENSCINP00000015860.3	GO:0005509
AIPGENE8469	HMCN2	Hemicentin-2	A2AJ76	ENSCINP00000001942.3	GO:0005509
AIPGENE28493	HNF4G	Hepatocyte nuclear factor 4-gamma	Q14541	ENSCINP00000019457.3
AIPGENE14617	HOIL1	RanBP-type and C3HC4-type zinc finger-containing protein 1	E6ZIJ1	ENSCINP00000033831.1	GO:0008270 GO:0046872
AIPGENE24476	HPPD	4-hydroxyphenylpyruvate dioxygenase	Q5BKL0	ENSCINP00000020387.3	GO:0003868 GO:0009072 GO:0016701 GO:0046872 GO:0055114
AIPGENE24739	HRH2	Histamine H2 receptor	P47747	ENSCINP00000009895.3	GO:0004930 GO:0007186 GO:0016020 GO:0016021
AIPGENE18790	HS71A	Heat shock 70 kDa protein 1A	Q61696	ENSCINP00000011757.3	GO:0000166 GO:0005524
AIPGENE21738	HSP7C	Heat shock cognate 71 kDa protein	Q71U34	ENSCINP00000019652.3
AIPGENE5814	HSP7C	Heat shock cognate 71 kDa protein	Q71U34	ENSCINP00000019652.3
AIPGENE27608	HSP97	97 kDa heat shock protein	Q94738	ENSCINP00000001654.3	GO:0000166 GO:0005524
AIPGENE28007	HTOMT	Tabersonine 16-O-methyltransferase	B0EXJ8
AIPGENE17792	HUTH	Histidine ammonia-lyase	P42357	ENSCINP00000013857.3	GO:0003824 GO:0004397 GO:0005737 GO:0006547 GO:0006548 GO:0016829 GO:0016841 GO:0019556 GO:0019557
AIPGENE26189	HYES	Bifunctional epoxide hydrolase 2	Q6Q2C2	ENSCINP00000028721.2	GO:0003824 GO:0008152 GO:0016787
AIPGENE18873	I23O2	Indoleamine 2,3-dioxygenase 2	Q8R0V5
AIPGENE1254	IF	Gastric intrinsic factor	P17267
AIPGENE11903	IF2	Translation initiation factor IF-2	B3EAE7
AIPGENE13893	IF4A1	Eukaryotic initiation factor 4A-I	P60843	ENSCINP00000005836.3	GO:0000166 GO:0003676 GO:0004004 GO:0004386 GO:0005524 GO:0006413 GO:0010468 GO:0010501 GO:0016787
AIPGENE3468	IFI44	Interferon-induced protein 44	Q8TCB0	ENSCINP00000019144.3
AIPGENE8988	IFI44	Interferon-induced protein 44	Q8TCB0
AIPGENE10180	IFIH1	Interferon-induced helicase C domain-containing protein 1	Q9BYX4	ENSCINP00000031621.1
AIPGENE18569	IFIH1	Interferon-induced helicase C domain-containing protein 1	Q9BYX4	ENSCINP00000031621.1
AIPGENE14622	IIGP5	Interferon-inducible GTPase 5	Q6NXR0
AIPGENE14629	IIGP5	Interferon-inducible GTPase 5	Q6NXR0
AIPGENE25676	INO1A	Inositol-3-phosphate synthase 1-A	Q7ZXY0
AIPGENE20336	INSI2	Insulin-induced gene 2 protein	Q91WG1
AIPGENE15014	IOD1	Type I iodothyronine deiodinase	O42449	ENSCINP00000035404.1
AIPGENE19232	IRF2	Interferon regulatory factor 2	Q98925	ENSCINP00000005767.3	GO:0000975 GO:0003700 GO:0006355
AIPGENE24707	IRF2	Interferon regulatory factor 2	P14316	ENSCINP00000005767.3	GO:0000975 GO:0003700 GO:0006355
AIPGENE1568	IRF8	Interferon regulatory factor 8	Q90871	ENSCINP00000001474.3	GO:0000975
AIPGENE20436	JUN	Transcription factor AP-1	P54864	ENSCINP00000018871.3
AIPGENE1601	K1468	LisH domain and HEAT repeat-containing protein KIAA1468 homolog	Q6P6Y1	ENSCINP00000015377.3
AIPGENE27863	KARG	Arginine kinase	O15990	ENSCINP00000017993.3
AIPGENE9229	KDM8	Lysine-specific demethylase 8	Q497B8	ENSCINP00000008667.3
AIPGENE7287	KLC	Kinesin light chain	P46824	ENSCINP00000034474.1
AIPGENE9819	KLC	Kinesin light chain	P46822	ENSCINP00000034474.1
AIPGENE28799	KLF10	Krueppel-like factor 10	O08876	ENSCINP00000012549.3	GO:0003676 GO:0046872
AIPGENE26876	KLHL3	Kelch-like protein 3	E0CZ16	ENSCINP00000008089.3	GO:0004842 GO:0031463 GO:0042787
AIPGENE27005	KLHL4	Kelch-like protein 4	Q9C0H6	ENSCINP00000023174.2	GO:0004842 GO:0016567 GO:0031463
AIPGENE13828	LACS8	Long chain acyl-CoA synthetase 8	Q9SJD4	ENSCINP00000005887.3	GO:0003824 GO:0008152
AIPGENE17012	LAMA4	Laminin subunit alpha-4	Q16363	ENSCINP00000016161.3
AIPGENE15997	LAMB2	Laminin subunit beta-2	Q61292	ENSCINP00000013062.3
AIPGENE27242	LAMP1	Lysosome-associated membrane glycoprotein 1	Q05204	ENSCINP00000026601.2
AIPGENE22791	LAT3	Large neutral amino acids transporter small subunit 3	Q8BSM7	ENSCINP00000036491.1	GO:0016020 GO:0016021
AIPGENE23106	LGMN	Legumain	Q95M12	ENSCINP00000006801.3	GO:0004197 GO:0005773 GO:0006508 GO:0006624 GO:0008233 GO:0051603
AIPGENE27537	LIN41	E3 ubiquitin-protein ligase TRIM71	Q1PRL4	ENSCINP00000023310.2
AIPGENE26593	LIP1	Lipase ZK262.3	Q9XTR8
AIPGENE564	LIPR1	Inactive pancreatic lipase-related protein 1	Q5BKQ4	ENSCINP00000014633.3	GO:0004806 GO:0005576 GO:0006629 GO:0052689
AIPGENE8872	LIPR2	Pancreatic lipase-related protein 2	P54318	ENSCINP00000014633.3	GO:0004806 GO:0005576 GO:0006629 GO:0052689
AIPGENE22220	LOX5	Arachidonate 5-lipoxygenase	P48999	ENSCINP00000015881.3	GO:0005506 GO:0016491 GO:0016702 GO:0046872 GO:0051213 GO:0055114
AIPGENE3931	LRIG3	Leucine-rich repeats and immunoglobulin-like domains protein 3	Q6P1C6	ENSCINP00000030254.1
AIPGENE22337	LRRK2	Leucine-rich repeat serine/threonine-protein kinase 2	Q5S006	ENSCINP00000025708.2	GO:0005525 GO:0005622 GO:0007264 GO:0016787
AIPGENE13786	LSD2	Lipid storage droplets surface-binding protein 2	Q9VXY7
AIPGENE13692	LYAG	Lysosomal alpha-glucosidase	P10253	ENSCINP00000008112.3	GO:0003824 GO:0004553 GO:0005975 GO:0008152 GO:0016787 GO:0016798 GO:0030246
AIPGENE20624	LYOX	Protein-lysine 6-oxidase	P45845	ENSCINP00000013067.3	GO:0005044 GO:0005507 GO:0006898 GO:0016020 GO:0016641 GO:0055114
AIPGENE6132	MA2B1	Lysosomal alpha-mannosidase	Q60HE9	ENSCINP00000003992.3	GO:0003824 GO:0004553 GO:0004559 GO:0005975 GO:0006013 GO:0006517 GO:0008152 GO:0008270 GO:0015923 GO:0016787 GO:0016798 GO:0030246 GO:0046872
AIPGENE6148	MA2B1	Lysosomal alpha-mannosidase	Q60HE9	ENSCINP00000003992.3	GO:0003824 GO:0004553 GO:0004559 GO:0005975 GO:0006013 GO:0006517 GO:0008152 GO:0008270 GO:0015923 GO:0016787 GO:0016798 GO:0030246 GO:0046872
AIPGENE26161	MAF	Transcription factor Maf	Q98UK4	ENSCINP00000002531.3	GO:0001228 GO:0003677 GO:0003700 GO:0005634 GO:0006351 GO:0006355 GO:0006357 GO:0006366 GO:0043565 GO:0045944
AIPGENE18937	MAFG	Transcription factor MafG	Q76MX4	ENSCINP00000002531.3	GO:0001228 GO:0003677 GO:0003700 GO:0005634 GO:0006351 GO:0006355 GO:0006357 GO:0006366 GO:0043565 GO:0045944
AIPGENE133	MATN2	Matrilin-2	O08746	ENSCINP00000001942.3	GO:0005509
AIPGENE2489	MATN2	Matrilin-2	O00339	ENSCINP00000014717.3
AIPGENE11650	MB212	Protein mab-21-like 2	Q8UUZ1	ENSCINP00000021875.2
AIPGENE16732	MB212	Protein mab-21-like 2	Q8UUZ1	ENSCINP00000021875.2
AIPGENE4828	MCA7	Metacaspase-7	Q6XPT5
AIPGENE15953	MCAT	Mitochondrial carnitine/acylcarnitine carrier protein	Q9Z2Z6	ENSCINP00000016773.3	GO:0003735 GO:0006412 GO:0006810 GO:0016020 GO:0016021 GO:0055085
AIPGENE15960	MCAT	Mitochondrial carnitine/acylcarnitine carrier protein	Q9Z2Z6	ENSCINP00000016773.3	GO:0003735 GO:0006412 GO:0006810 GO:0016020 GO:0016021 GO:0055085
AIPGENE9553	MET7B	Methyltransferase-like protein 7B	Q6UX53	ENSCINP00000027827.2	GO:0005737 GO:0005829 GO:0008757 GO:0030791 GO:0032259
AIPGENE2103	MFGM	Lactadherin	P70490	ENSCINP00000006532.3	GO:0005509
AIPGENE20554	MFS12	Major facilitator superfamily domain-containing protein 12	Q3U481	ENSCINP00000031725.1	GO:0016020 GO:0016021
AIPGENE20557	MFS12	Major facilitator superfamily domain-containing protein 12	Q3U481	ENSCINP00000031725.1	GO:0016020 GO:0016021
AIPGENE26741	MFS12	Major facilitator superfamily domain-containing protein 12	Q3U481	ENSCINP00000031725.1	GO:0016020 GO:0016021
AIPGENE649	MFSD1	Major facilitator superfamily domain-containing protein 1	Q32LQ6	ENSCINP00000000792.3	GO:0016020 GO:0016021 GO:0055085
AIPGENE14711	MFSD6	Major facilitator superfamily domain-containing protein 6	Q8CBH5	ENSCINP00000006447.3	GO:0016020 GO:0016021
AIPGENE4727	MFSD8	Major facilitator superfamily domain-containing protein 8	Q6GPQ3	ENSCINP00000007756.3	GO:0016020 GO:0016021 GO:0055085
AIPGENE5656	MGLL	Monoglyceride lipase	Q99685	ENSCINP00000020690.3
AIPGENE14950	MINP1	Multiple inositol polyphosphate phosphatase 1	Q9Z2L6	ENSCINP00000036092.1	GO:0003993 GO:0016311 GO:0016791
AIPGENE815	MIOX	Inositol oxygenase	Q4V8T0	ENSCINP00000009005.3	GO:0005506 GO:0005737 GO:0019310 GO:0050113 GO:0055114
AIPGENE15748	MIP	Lens fiber major intrinsic protein	Q6J8I9	ENSCINP00000011466.3	GO:0005215 GO:0005887 GO:0006810 GO:0006833 GO:0009992 GO:0015250 GO:0015254 GO:0015793 GO:0016020 GO:0016021 GO:0034220
AIPGENE28801	MLRP1	MAM and LDL-receptor class A domain-containing protein 1 (Fragment)	B3EWZ5	ENSCINP00000026839.2
AIPGENE28176	MLRP2	MAM and LDL-receptor class A domain-containing protein 2 (Fragment)	B3EWZ6	ENSCINP00000036530.1	GO:0016020
AIPGENE19158	MOG2A	2-acylglycerol O-acyltransferase 2-A	Q2KHS5	ENSCINP00000004063.3	GO:0016747
AIPGENE20952	MOG2A	2-acylglycerol O-acyltransferase 2-A	Q2KHS5	ENSCINP00000004063.3	GO:0016747
AIPGENE1928	MOT10	Monocarboxylate transporter 10	Q3U9N9	ENSCINP00000007886.2	GO:0005215 GO:0016020 GO:0016021 GO:0034220 GO:0055085
AIPGENE2143	MOT10	Monocarboxylate transporter 10	A1L1W9	ENSCINP00000007886.2	GO:0005215 GO:0016020 GO:0016021 GO:0034220 GO:0055085
AIPGENE1268	MOT5	Monocarboxylate transporter 5	Q8R0M8	ENSCINP00000026236.2
AIPGENE3051	MOT8	Monocarboxylate transporter 8	Q8K1P8	ENSCINP00000026773.2	GO:0005887 GO:0015129 GO:0016020 GO:0016021 GO:0035879 GO:0055085
AIPGENE3158	MOT8	Monocarboxylate transporter 8	Q8K1P8	ENSCINP00000007886.2	GO:0005215 GO:0016020 GO:0016021 GO:0034220 GO:0055085
AIPGENE21866	MOXD1	DBH-like monooxygenase protein 1 homolog	Q5TZ24	ENSCINP00000006004.3	GO:0003824 GO:0004497 GO:0005507 GO:0016715 GO:0055114
AIPGENE15605	MPEG1	Macrophage-expressed gene 1 protein	Q9WV57
AIPGENE1799	MRC1	Macrophage mannose receptor 1	Q61830	ENSCINP00000004176.3	GO:0016020 GO:0016021
AIPGENE14371	MRLCA	Myosin regulatory light chain RLC-A	P13832	ENSCINP00000035076.1
AIPGENE22589	MRP4	Multidrug resistance-associated protein 4	O15439	ENSCINP00000015473.3	GO:0000166 GO:0005524 GO:0006810 GO:0016020 GO:0016021 GO:0016887 GO:0042626 GO:0055085
AIPGENE25331	MRP4	Multidrug resistance-associated protein 4	O15439	ENSCINP00000015473.3	GO:0000166 GO:0005524 GO:0006810 GO:0016020 GO:0016021 GO:0016887 GO:0042626 GO:0055085
AIPGENE28235	MRP5	Multidrug resistance-associated protein 5	Q9QYM0	ENSCINP00000013413.3	GO:0000166 GO:0005215 GO:0005524 GO:0006810 GO:0016020 GO:0016021 GO:0016887 GO:0042626 GO:0055085
AIPGENE5829	MTPN	Myotrophin	Q91955	ENSCINP00000012849.2
AIPGENE25437	MUC1	Integumentary mucin C.1 (Fragment)	Q05049	ENSCINP00000035374.1
AIPGENE4554	MUC2	Mucin-2 (Fragment)	Q62635	ENSCINP00000035305.1
AIPGENE14373	MYO3A	Myosin-IIIa	Q8NEV4	ENSCINP00000010911.3	GO:0000166 GO:0004672 GO:0004702 GO:0005524 GO:0005737 GO:0006468 GO:0023014
AIPGENE8101	MYOF	Myoferlin	B3DLH6	ENSCINP00000013715.3	GO:0016020 GO:0016021
AIPGENE25325	MYPH	Myophilin	Q24799	ENSCINP00000025754.2
AIPGENE4205	MYPH	Myophilin	Q24799	ENSCINP00000025754.2
AIPGENE3953	N2F1A	Nuclear receptor subfamily 2 group F member 1-A	Q06725	ENSCINP00000004102.3	GO:0003677 GO:0003700 GO:0003707 GO:0004879 GO:0005634 GO:0006351 GO:0006355 GO:0008270 GO:0030522 GO:0043401 GO:0043565 GO:0046872
AIPGENE13027	NAGAB	Alpha-N-acetylgalactosaminidase	Q90744	ENSCINP00000031972.1	GO:0003824 GO:0004553 GO:0004557 GO:0005737 GO:0005975 GO:0008152 GO:0016139 GO:0016787 GO:0016798
AIPGENE13031	NAGAB	Alpha-N-acetylgalactosaminidase	Q90744	ENSCINP00000031972.1	GO:0003824 GO:0004553 GO:0004557 GO:0005737 GO:0005975 GO:0008152 GO:0016139 GO:0016787 GO:0016798
AIPGENE24074	NARPB	Notch-regulated ankyrin repeat-containing protein B	Q7T3X9	ENSCINP00000008656.3	GO:0007165 GO:0019208 GO:0019901 GO:0050790
AIPGENE5975	NAS15	Zinc metalloproteinase nas-15	P55115	ENSCINP00000017083.3	GO:0004222 GO:0006508 GO:0008233 GO:0008237 GO:0008270 GO:0016020 GO:0016787 GO:0046872
AIPGENE17549	NAS4	Zinc metalloproteinase nas-4	P55112	ENSCINP00000030500.1	GO:0004222 GO:0006508 GO:0008233 GO:0008237 GO:0008270 GO:0016787 GO:0046872
AIPGENE8386	NAT16	Probable N-acetyltransferase 16	Q8N8M0
AIPGENE25378	NCA11	Neural cell adhesion molecule 1-A	P16170	ENSCINP00000015860.3	GO:0005509
AIPGENE24468	NCL1	B-box type zinc finger protein ncl-1	P34611
AIPGENE5315	NEP	Neprilysin	P08049	ENSCINP00000011815.3	GO:0004222 GO:0006508 GO:0008237
AIPGENE15229	NETR	Neurotrypsin	Q5G265	ENSCINP00000010391.3	GO:0005201 GO:0005509 GO:0005578
AIPGENE25764	NETR	Neurotrypsin	O08762	ENSCINP00000013067.3	GO:0005044 GO:0005507 GO:0006898 GO:0016020 GO:0016641 GO:0055114
AIPGENE18582	NFH	Neurofilament heavy polypeptide	P19246
AIPGENE1175	NGB	Neuroglobin	Q99JA8	ENSCINP00000015555.3	GO:0005344 GO:0006810 GO:0015671 GO:0019825 GO:0020037
AIPGENE5536	NKX62	Homeobox protein Nkx-6.2	Q9C056	ENSCINP00000023047.2	GO:0003677 GO:0005634 GO:0006355 GO:0043565
AIPGENE22109	NNMT	Nicotinamide N-methyltransferase	P40261
AIPGENE5531	NPC1	Niemann-Pick C1 protein	P56941	ENSCINP00000008700.3	GO:0005319 GO:0006869 GO:0016020 GO:0016021
AIPGENE20032	NPC2	Epididymal secretory protein E1	P79345	ENSCINP00000030926.1
AIPGENE22473	NPC2	Epididymal secretory protein E1	P79345	ENSCINP00000030926.1
AIPGENE22527	NPC2	Protein NPC2 homolog	Q9VQ62	ENSCINP00000021760.2
AIPGENE3074	NPC2	Protein NPC2 homolog	Q9VQ62	ENSCINP00000021760.2
AIPGENE26780	NPHP3	Nephrocystin-3	Q7Z494	ENSCINP00000035104.1	GO:0005813 GO:0007346 GO:0030496
AIPGENE4737	NPHP3	Nephrocystin-3	Q7Z494	ENSCINP00000034474.1
AIPGENE16407	NRF6	Nose resistant to fluoxetine protein 6	Q09225	ENSCINP00000013754.3	GO:0016020 GO:0016021 GO:0016747
AIPGENE16438	NRF6	Nose resistant to fluoxetine protein 6	Q09225	ENSCINP00000013754.3	GO:0016020 GO:0016021 GO:0016747
AIPGENE11352	NWD1	NACHT domain- and WD repeat-containing protein 1	A6H603	ENSCINP00000035575.1
AIPGENE8824	OBL	Obelin	Q27709
AIPGENE11507	OCTL	Organic cation transporter-like protein	Q95R48	ENSCINP00000015651.3	GO:0005215 GO:0016020 GO:0016021 GO:0022857 GO:0022891 GO:0055085
AIPGENE17506	OCTL	Organic cation transporter-like protein	Q95R48	ENSCINP00000001843.3	GO:0005215 GO:0016020 GO:0016021 GO:0022857 GO:0022891 GO:0055085
AIPGENE22419	OCTL	Organic cation transporter-like protein	Q95R48	ENSCINP00000020124.3	GO:0005887 GO:0016020 GO:0016021 GO:0022857 GO:0022891 GO:0055085
AIPGENE3952	OCTL	Organic cation transporter-like protein	Q95R48	ENSCINP00000020124.3	GO:0005887 GO:0016020 GO:0016021 GO:0022857 GO:0022891 GO:0055085
AIPGENE25700	OIT3	Oncoprotein-induced transcript 3 protein	Q6V0K7
AIPGENE6868	OIT3	Oncoprotein-induced transcript 3 protein	Q29RU2
AIPGENE24712	ORCT	Organic cation transporter protein	Q9VCA2	ENSCINP00000035947.1	GO:0005452 GO:0005887 GO:0015347 GO:0015698 GO:0016020 GO:0016021 GO:0022857 GO:0043252 GO:0055085
AIPGENE5596	ORCT	Organic cation transporter protein	Q9VCA2	ENSCINP00000001843.3	GO:0005215 GO:0016020 GO:0016021 GO:0022857 GO:0022891 GO:0055085
AIPGENE3394	OX1R	Orexin receptor type 1	Q0GBZ5	ENSCINP00000015323.3
AIPGENE11869	P20D2	Peptidase M20 domain-containing protein 2	Q8IYS1
AIPGENE18168	P3H2	Prolyl 3-hydroxylase 2	Q8IVL5	ENSCINP00000012097.3	GO:0005506 GO:0016491 GO:0016705 GO:0031418 GO:0055114
AIPGENE5609	P4HA2	Prolyl 4-hydroxylase subunit alpha-2	O15460	ENSCINP00000031242.1
AIPGENE19666	PA2	Phospholipase A2	A7LCJ2	ENSCINP00000028223.2
AIPGENE4696	PA2	Phospholipase A2	D2X8K2	ENSCINP00000028223.2
AIPGENE9806	PA24A	Cytosolic phospholipase A2	P50392	ENSCINP00000017628.3	GO:0004620 GO:0004623 GO:0005737 GO:0006629 GO:0008152 GO:0009395 GO:0016042 GO:0016787 GO:0046872
AIPGENE24257	PAN2	PAB-dependent poly(A)-specific ribonuclease subunit PAN2	Q504Q3	ENSCINP00000000762.3	GO:0000289 GO:0000932 GO:0003676 GO:0004535 GO:0031251 GO:0090503
AIPGENE16667	PAPL	Iron/zinc purple acid phosphatase-like protein	A5D6U8
AIPGENE16909	PAR14	Poly [ADP-ribose] polymerase 14	Q2EMV9	ENSCINP00000006033.3	GO:0003950 GO:0016740 GO:0016757
AIPGENE22924	PAX3	Paired box protein Pax-3	P24610	ENSCINP00000013350.3	GO:0003677 GO:0005634 GO:0006351 GO:0006355 GO:0007275 GO:0043565
AIPGENE4570	PCFT	Proton-coupled folate transporter	Q6DCX5	ENSCINP00000001721.3	GO:0016020 GO:0016021 GO:0055085
AIPGENE3484	PCP	Lysosomal Pro-X carboxypeptidase	Q5RBU7	ENSCINP00000014308.3	GO:0003085 GO:0004185 GO:0006508 GO:0008236 GO:0008239 GO:0043535 GO:0060055
AIPGENE20867	PCSK5	Proprotein convertase subtilisin/kexin type 5	P41413	ENSCINP00000010394.3	GO:0004252 GO:0005615 GO:0006508 GO:0008233 GO:0008236 GO:0016485 GO:0016787
AIPGENE1809	PDK1L	Serine/threonine-protein kinase pdik1l	Q32PP3	ENSCINP00000006268.3	GO:0000166 GO:0004672 GO:0004674 GO:0005524 GO:0006468
AIPGENE2323	PEBPH	Phosphatidylethanolamine-binding protein homolog R644	Q5UR88	ENSCINP00000007360.3
AIPGENE24553	PGDH	15-hydroxyprostaglandin dehydrogenase [NAD(+)]	Q8VCC1	ENSCINP00000002542.2	GO:0016491 GO:0055114
AIPGENE6172	PGRC1	Membrane-associated progesterone receptor component 1	O00264	ENSCINP00000033808.1
AIPGENE25099	PHLD	Phosphatidylinositol-glycan-specific phospholipase D	Q8R2H5	ENSCINP00000032069.1
AIPGENE6449	PHNX	Phosphonoacetaldehyde hydrolase	Q2SHM4	ENSCINP00000024234.2
AIPGENE11495	PHR	Deoxyribodipyrimidine photo-lyase	Q28811
AIPGENE11501	PISD	Phosphatidylserine decarboxylase proenzyme	Q5R8I8	ENSCINP00000036014.1	GO:0004609 GO:0008654
AIPGENE23141	PK1L2	Polycystic kidney disease protein 1-like 2	Q7TN88	ENSCINP00000008806.3	GO:0005262 GO:0005509 GO:0016020 GO:0016021 GO:0050982 GO:0070588
AIPGENE940	PK1L2	Polycystic kidney disease protein 1-like 2	Q7TN88	ENSCINP00000008806.3	GO:0005262 GO:0005509 GO:0016020 GO:0016021 GO:0050982 GO:0070588
AIPGENE23144	PKDRE	Polycystic kidney disease and receptor for egg jelly-related protein	Q9Z0T6	ENSCINP00000034979.1	GO:0001822 GO:0005262 GO:0016020 GO:0016021 GO:0050982 GO:0070588
AIPGENE17365	PKHL1	Fibrocystin-L	Q80ZA4	ENSCINP00000032083.1
AIPGENE762	PLBL2	Putative phospholipase B-like 2	Q2KIY5	ENSCINP00000021735.2
AIPGENE11529	PLD2	Phospholipase D2	O14939	ENSCINP00000026201.2
AIPGENE27672	PLK4	Serine/threonine-protein kinase PLK4	A7SNN5	ENSCINP00000028801.2	GO:0016020 GO:0016021
AIPGENE1675	POL2	Retrovirus-related Pol polyprotein from transposon 297	P20825	ENSCINP00000036259.1	GO:0003676 GO:0008270 GO:0015074
AIPGENE19842	POL2	Retrovirus-related Pol polyprotein from transposon 297	P20825	ENSCINP00000036259.1	GO:0003676 GO:0008270 GO:0015074
AIPGENE27952	POL2	Retrovirus-related Pol polyprotein from transposon 297	P20825	ENSCINP00000036259.1	GO:0003676 GO:0008270 GO:0015074
AIPGENE5480	POL3	Retrovirus-related Pol polyprotein from transposon 17.6	P04323	ENSCINP00000036259.1	GO:0003676 GO:0008270 GO:0015074
AIPGENE16289	POL5	Retrovirus-related Pol polyprotein from transposon opus	Q8I7P9	ENSCINP00000036259.1	GO:0003676 GO:0008270 GO:0015074
AIPGENE27985	PP16A	Protein phosphatase 1 regulatory subunit 16A	Q96I34	ENSCINP00000008656.3	GO:0007165 GO:0019208 GO:0019901 GO:0050790
AIPGENE12995	PPIB	Peptidyl-prolyl cis-trans isomerase B	P24367	ENSCINP00000004181.2	GO:0000413 GO:0003755 GO:0006457 GO:0016853
AIPGENE7602	PPT1	Palmitoyl-protein thioesterase 1	Q8HXW6	ENSCINP00000016630.3	GO:0002084 GO:0005764 GO:0006898 GO:0008474 GO:0098599
AIPGENE3994	PRDM6	Putative histone-lysine N-methyltransferase PRDM6	Q9NQX0	ENSCINP00000006383.3	GO:0003676 GO:0046872
AIPGENE4010	PRDM6	Putative histone-lysine N-methyltransferase PRDM6	Q3UZD5	ENSCINP00000007111.3	GO:0003676 GO:0046872
AIPGENE16440	PRPF3	U4/U6 small nuclear ribonucleoprotein Prp3	Q5ZJ85	ENSCINP00000006800.3	GO:0000398 GO:0046540
AIPGENE1816	PRS23	Serine protease 23	Q9D6X6	ENSCINP00000030817.1	GO:0004252 GO:0006508
AIPGENE27212	PSA	Puromycin-sensitive aminopeptidase	P55786	ENSCINP00000014130.3	GO:0005737 GO:0005886 GO:0006508 GO:0008237 GO:0008270 GO:0042277 GO:0043171 GO:0070006
AIPGENE8998	PXDN	Peroxidasin homolog	Q92626	ENSCINP00000014324.3	GO:0004601 GO:0006979 GO:0020037 GO:0055114 GO:0098869
AIPGENE9002	PXMP2	Peroxisomal membrane protein 2	Q07066	ENSCINP00000026931.2
AIPGENE1976	QORX	Quinone oxidoreductase PIG3	Q53FA7	ENSCINP00000016387.3	GO:0008270 GO:0016491 GO:0055114
AIPGENE20314	RAB32	Ras-related protein Rab-32	Q9CZE3	ENSCINP00000013519.3	GO:0005525 GO:0005739 GO:0005802 GO:0007264 GO:0032438 GO:0042470
AIPGENE10740	RAB7L	Ras-related protein Rab-7L1	Q63481	ENSCINP00000013519.3	GO:0005525 GO:0005739 GO:0005802 GO:0007264 GO:0032438 GO:0042470
AIPGENE5601	RACA	Rho-related protein racA	P34147	ENSCINP00000035599.1
AIPGENE15688	RBCC1	RB1-inducible coiled-coil protein 1	Q9ESK9	ENSCINP00000004276.3	GO:0000045 GO:0001934 GO:0019901 GO:0034045 GO:1990316
AIPGENE13372	RBM34	RNA-binding protein 34	P42696	ENSCINP00000035044.1	GO:0000166 GO:0003676
AIPGENE13091	RBM5	RNA-binding protein 5	P52756	ENSCINP00000005260.3	GO:0000166 GO:0003676
AIPGENE334	RCN3	Reticulocalbin-3	Q8BH97	ENSCINP00000025165.2	GO:0005509
AIPGENE16826	RDHE2	Epidermal retinol dehydrogenase 2	Q7TQA3	ENSCINP00000002227.3	GO:0016020 GO:0016021
AIPGENE25745	REG1A	Lithostathine-1-alpha	P05451	ENSCINP00000030082.1
AIPGENE14277	RERG	Ras-related and estrogen-regulated growth inhibitor	Q0VCJ7	ENSCINP00000026160.2
AIPGENE2133	RET	Proto-oncogene tyrosine-protein kinase receptor Ret	P35546	ENSCINP00000007167.3	GO:0004672 GO:0004713 GO:0004714 GO:0005524 GO:0006468 GO:0007169 GO:0016020 GO:0016021 GO:0018108
AIPGENE18105	RHBG	Ammonium transporter Rh type B	Q7T070	ENSCINP00000018176.3	GO:0005887 GO:0008519 GO:0015695 GO:0015696 GO:0016020 GO:0016021 GO:0019740 GO:0072488
AIPGENE18108	RHCG	Ammonium transporter Rh type C	Q19KH7	ENSCINP00000018176.3	GO:0005887 GO:0008519 GO:0015695 GO:0015696 GO:0016020 GO:0016021 GO:0019740 GO:0072488
AIPGENE13241	RHCL2	Ammonium transporter Rh type C-like 2	Q8JI14	ENSCINP00000018176.3	GO:0005887 GO:0008519 GO:0015695 GO:0015696 GO:0016020 GO:0016021 GO:0019740 GO:0072488
AIPGENE27642	RHG06	Rho GTPase-activating protein 6	O43182	ENSCINP00000008340.3	GO:0007165 GO:0008289
AIPGENE18190	RN213	E3 ubiquitin-protein ligase RNF213	Q63HN8	ENSCINP00000025063.2
AIPGENE3139	RNOY	Ribonuclease Oy	Q7M456	ENSCINP00000030837.1
AIPGENE8557	ROCO4	Probable serine/threonine-protein kinase roco4	Q6XHB2	ENSCINP00000018103.3
AIPGENE2264	ROMO1	Reactive oxygen species modulator 1	A4QNF3
AIPGENE2707	RPB1	DNA-directed RNA polymerase II subunit RPB1 (Fragment)	P11414
AIPGENE1565	RRM3	ATP-dependent DNA helicase RRM3	P38766	ENSCINP00000005776.3	GO:0000002 GO:0000166 GO:0000723 GO:0003677 GO:0003678 GO:0004386 GO:0005524 GO:0005634 GO:0005657 GO:0005739 GO:0006260 GO:0006281 GO:0006310 GO:0006974 GO:0010521 GO:0016787 GO:0032211 GO:0032508 GO:0043141 GO:0044806 GO:0051974
AIPGENE18289	RTJK	RNA-directed DNA polymerase from mobile element jockey	P21328	ENSCINP00000031852.1
AIPGENE1439	S13A3	Solute carrier family 13 member 3	Q8WWT9	ENSCINP00000017609.3	GO:0005215 GO:0005887 GO:0006814 GO:0016020 GO:0016021 GO:0055085 GO:0098656
AIPGENE1279	SLC15A4	Solute carrier family 15 member 4	Q68F72	ENSCINP00000014849.3	GO:0005215 GO:0006810 GO:0006857 GO:0016020 GO:0016021
AIPGENE27783	SLC15A4	Solute carrier family 15 member 4	Q68F72	ENSCINP00000000708.3	GO:0005215 GO:0006810 GO:0006857 GO:0016020 GO:0016021
AIPGENE27827	SLC15A4	Solute carrier family 15 member 4	O09014	ENSCINP00000033357.1
AIPGENE20198	S1C2A	Sulfotransferase 1C2A	Q9WUW9	ENSCINP00000035987.1
AIPGENE5971	S22A5	Solute carrier family 22 member 5	O76082	ENSCINP00000015651.3	GO:0005215 GO:0016020 GO:0016021 GO:0022857 GO:0022891 GO:0055085
AIPGENE20675	S22A9	Solute carrier family 22 member 9	Q8IVM8	ENSCINP00000015651.3	GO:0005215 GO:0016020 GO:0016021 GO:0022857 GO:0022891 GO:0055085
AIPGENE3453	S22AA	Solute carrier family 22 member 10	Q63ZE4	ENSCINP00000006844.3	GO:0005887 GO:0008514 GO:0015711 GO:0016020 GO:0016021 GO:0022857 GO:0055085
AIPGENE3502	S22AG	Solute carrier family 22 member 16	Q66KG0	ENSCINP00000031102.1	GO:0016020 GO:0016021
AIPGENE26569	S238B	Solute carrier family 25 member 38-B	P0CAT2	ENSCINP00000018439.3
AIPGENE27216	S23A1	Solute carrier family 23 member 1	Q9Z2J0	ENSCINP00000002802.3	GO:0005215 GO:0006810 GO:0016020 GO:0016021 GO:0055085
AIPGENE24231	S23A2	Solute carrier family 23 member 2	B0JZG0	ENSCINP00000007695.3	GO:0005215 GO:0006810 GO:0016020 GO:0016021 GO:0055085
AIPGENE8501	S26A4	Pendrin	Q9R154	ENSCINP00000022644.2
AIPGENE3906	S6A11	Sodium- and chloride-dependent GABA transporter 3	P48066	ENSCINP00000017435.3
AIPGENE6454	S6A13	Sodium- and chloride-dependent GABA transporter 2	P31646	ENSCINP00000017435.3
AIPGENE21470	SAP	Proactivator polypeptide	O13035	ENSCINP00000013045.3	GO:0001664 GO:0005737 GO:0005764 GO:0006629 GO:0006665 GO:0008047 GO:0043085
AIPGENE17132	SAS6	Spindle assembly abnormal protein 6 homolog	Q5ZMV2	ENSCINP00000018623.3
AIPGENE13749	SBP1	Selenium-binding protein 1	Q569D5	ENSCINP00000010226.3	GO:0008430
AIPGENE17806	SC5A3	Sodium/myo-inositol cotransporter	P31637	ENSCINP00000014618.3
AIPGENE25227	SC5A3	Sodium/myo-inositol cotransporter	P53794	ENSCINP00000031732.1	GO:0007165
AIPGENE14217	SC5A7	High-affinity choline transporter 1	Q8UWF0	ENSCINP00000008776.3	GO:0005215 GO:0005307 GO:0005887 GO:0006810 GO:0008292 GO:0015871 GO:0016020 GO:0016021 GO:0033265 GO:0055085
AIPGENE10021	SC5A8	Sodium-coupled monocarboxylate transporter 1	Q8BYF6	ENSCINP00000011213.3	GO:0005215 GO:0005887 GO:0006810 GO:0015293 GO:0016020 GO:0016021 GO:0055085
AIPGENE23673	SC5D	Lathosterol oxidase	O88822	ENSCINP00000027428.2
AIPGENE18339	SCAP	Sterol regulatory element-binding protein cleavage-activating protein	Q6GQT6	ENSCINP00000016846.3	GO:0000139 GO:0005789 GO:0008203 GO:0015485 GO:0016020 GO:0016021 GO:0032933
AIPGENE3555	SCPDL	Saccharopine dehydrogenase-like oxidoreductase	Q8NBX0	ENSCINP00000023327.2	GO:0016020 GO:0016021 GO:0016491 GO:0055114
AIPGENE21060	SCRK	Putative fructokinase	O05510
AIPGENE24684	SDF2	Stromal cell-derived factor 2	Q3SZ45	ENSCINP00000029849.1	GO:0000032 GO:0004169 GO:0007275 GO:0016020 GO:0031502 GO:0035269 GO:0044845 GO:1900101
AIPGENE23099	SE1L1	Protein sel-1 homolog 1	Q9UBV2	ENSCINP00000006011.3	GO:0016020 GO:0016021
AIPGENE24751	SEC	Probable UDP-N-acetylglucosamine--peptide N-acetylglucosaminyltransferase SEC	Q9M8Y0	ENSCINP00000013052.3
AIPGENE17639	SEM5B	Semaphorin-5B	Q9P283	ENSCINP00000015858.3	GO:0005509
AIPGENE11035	SFRP3	Secreted frizzled-related protein 3	P97401	ENSCINP00000036216.1
AIPGENE12684	SGPL1	Sphingosine-1-phosphate lyase 1	Q8CHN6	ENSCINP00000002369.3	GO:0003824 GO:0016829 GO:0016831 GO:0019752 GO:0030170
AIPGENE337	SGS1	ATP-dependent helicase SGS1	P35187	ENSCINP00000008261.3	GO:0003676 GO:0004386 GO:0005524 GO:0006260 GO:0006281 GO:0006310 GO:0008026 GO:0016787 GO:0032508 GO:0043140
AIPGENE8899	SGS4	Salivary glue protein Sgs-4	Q00725
AIPGENE721	SIAE	Sialate O-acetylesterase	P70665	ENSCINP00000001140.3
AIPGENE11218	SIR1	NAD-dependent protein deacetylase SRT1	B8ARK7	ENSCINP00000002463.3	GO:0070403
AIPGENE5456	SL9B2	Mitochondrial sodium/hydrogen exchanger 9B2	Q86UD5	ENSCINP00000006194.3	GO:0006810 GO:0006812 GO:0015299 GO:0016020 GO:0016021 GO:0055085 GO:1902600
AIPGENE10650	SNR27	U4/U6.U5 small nuclear ribonucleoprotein 27 kDa protein	Q8K194
AIPGENE17665	SNTG2	Gamma-2-syntrophin	Q925E0	ENSCINP00000026050.2
AIPGENE19965	SPD2A	SH3 and PX domain-containing protein 2A	Q5TCZ1	ENSCINP00000024481.2
AIPGENE2530	SPDEF	SAM pointed domain-containing Ets transcription factor	Q9WTP3	ENSCINP00000024831.2	GO:0000981 GO:0003677 GO:0003700 GO:0005634 GO:0006355 GO:0006357 GO:0030154 GO:0043565
AIPGENE14029	SPIT2	Kunitz-type protease inhibitor 2	Q9WU03	ENSCINP00000017737.3	GO:0004867 GO:0010951
AIPGENE25178	SPRC	SPARC	P34714	ENSCINP00000004847.3	GO:0005509 GO:0005578 GO:0007165
AIPGENE16015	SPY2	Protein sprouty homolog 2	Q9PTL2	ENSCINP00000030183.1	GO:0007275 GO:0009966 GO:0016020
AIPGENE11862	STAR9	StAR-related lipid transfer protein 9	Q9P2P6	ENSCINP00000000065.3	GO:0008289
AIPGENE6178	STT3B	Dolichyl-diphosphooligosaccharide--protein glycosyltransferase subunit STT3B	Q8TCJ2	ENSCINP00000003935.3	GO:0004576 GO:0004579 GO:0006486 GO:0008250 GO:0016020 GO:0016021 GO:0018279 GO:0043687
AIPGENE8937	SYG	Glycine--tRNA ligase	P41250	ENSCINP00000018157.4
AIPGENE21323	SYIC	Isoleucine--tRNA ligase, cytoplasmic	P41252	ENSCINP00000005068.3	GO:0000166 GO:0002161 GO:0004812 GO:0004822 GO:0005524 GO:0005737 GO:0006412 GO:0006418 GO:0006428 GO:0006450 GO:0016874
AIPGENE12993	SYT1	Synaptotagmin-1	Q5R4J5	ENSCINP00000001641.3	GO:0005509 GO:0005544 GO:0005886 GO:0006887 GO:0006906 GO:0016020 GO:0017158 GO:0019905 GO:0030276 GO:0048791 GO:0098793
AIPGENE13021	SYT7	Synaptotagmin-7	O43581	ENSCINP00000001641.3	GO:0005509 GO:0005544 GO:0005886 GO:0006887 GO:0006906 GO:0016020 GO:0017158 GO:0019905 GO:0030276 GO:0048791 GO:0098793
AIPGENE27010	TBX1	T-box transcription factor TBX1	Q8AXX2	ENSCINP00000008846.2	GO:0003677 GO:0003700 GO:0005634 GO:0006351 GO:0006355
AIPGENE600	TCTP	Translationally-controlled tumor protein homolog	Q7QCK2	ENSCINP00000029118.2
AIPGENE28871	TDA6	Putative vacuolar protein sorting-associated protein TDA6	Q06466
AIPGENE25165	TGFR2	TGF-beta receptor type-2	P38438	ENSCINP00000000633.3	GO:0000166 GO:0004672 GO:0004674 GO:0004675 GO:0004702 GO:0005524 GO:0006468 GO:0007178 GO:0016020 GO:0016021 GO:0016301 GO:0016310 GO:0016740 GO:0023014 GO:0046872
AIPGENE18026	TGM1	Protein-glutamine gamma-glutamyltransferase K	P23606	ENSCINP00000010148.3	GO:0003810 GO:0018149 GO:0046872
AIPGENE8588	TICN2	Testican-2	Q9ER58	ENSCINP00000006167.3	GO:0005509 GO:0005578 GO:0007165
AIPGENE8609	TIMP1	Metalloproteinase inhibitor 1	P50122
AIPGENE2736	TITIN	Titin	A2ASS6	ENSCINP00000015858.3	GO:0005509
AIPGENE7023	TITIN	Titin	A2ASS6	ENSCINP00000013676.3	GO:0000166 GO:0004672 GO:0005524 GO:0005859 GO:0005865 GO:0006468 GO:0006941 GO:0007015 GO:0008307 GO:0016301 GO:0016310 GO:0016740 GO:0030018 GO:0031430 GO:0045214 GO:0051015 GO:0051371 GO:0071688 GO:0097493
AIPGENE11194	TM189	Transmembrane protein 189	Q99LQ7	ENSCINP00000018140.3	GO:0005737 GO:0016020 GO:0016021 GO:0016567 GO:0031625 GO:0061630
AIPGENE3242	TM53B	Transmembrane protein 53-B	Q6DJC8	ENSCINP00000004026.3	GO:0016020 GO:0016021
AIPGENE15175	TMPS3	Transmembrane protease serine 3	Q8K1T0	ENSCINP00000001165.3	GO:0004252 GO:0005044 GO:0005615 GO:0006508 GO:0006898 GO:0008233 GO:0008236 GO:0016020 GO:0016787
AIPGENE27486	TPM	Tropomyosin	Q8WR63	ENSCINP00000004783.3
AIPGENE203	TPP1	Tripeptidyl-peptidase 1	Q9EQV6
AIPGENE20835	TRAF3	TNF receptor-associated factor 3	Q60803	ENSCINP00000027890.2
AIPGENE1290	TRAF4	TNF receptor-associated factor 4	Q61382	ENSCINP00000003738.3	GO:0008270 GO:0046872
AIPGENE1843	TRAF4	TNF receptor-associated factor 4	Q9BUZ4	ENSCINP00000005981.3
AIPGENE18406	TRET1	Facilitated trehalose transporter Tret1	A9ZSY3	ENSCINP00000014757.3
AIPGENE3538	TRIP4	Activating signal cointegrator 1	Q9QXN3	ENSCINP00000008619.3	GO:0003713 GO:0005634 GO:0006355 GO:0006366 GO:0008270 GO:0045893
AIPGENE225	TRPC2	Short transient receptor potential channel 2	Q9R283	ENSCINP00000007988.3	GO:0005216 GO:0005262 GO:0006810 GO:0006811 GO:0016020 GO:0016021 GO:0055085 GO:0070588
AIPGENE3734	TRPC2	Short transient receptor potential channel 2 homolog	O62826	ENSCINP00000007988.3	GO:0005216 GO:0005262 GO:0006810 GO:0006811 GO:0016020 GO:0016021 GO:0055085 GO:0070588
AIPGENE4129	TRPC2	Short transient receptor potential channel 2	Q9R283	ENSCINP00000026899.2
AIPGENE18440	TRPL	Transient-receptor-potential-like protein	P34586	ENSCINP00000007988.3	GO:0005216 GO:0005262 GO:0006810 GO:0006811 GO:0016020 GO:0016021 GO:0055085 GO:0070588
AIPGENE10658	TTC28	Tetratricopeptide repeat protein 28	Q96AY4	ENSCINP00000035104.1	GO:0005813 GO:0007346 GO:0030496
AIPGENE16596	TTC28	Tetratricopeptide repeat protein 28	Q96AY4	ENSCINP00000035104.1	GO:0005813 GO:0007346 GO:0030496
AIPGENE18099	TTC28	Tetratricopeptide repeat protein 28	Q96AY4	ENSCINP00000018424.3
AIPGENE24471	TTC28	Tetratricopeptide repeat protein 28	Q96AY4	ENSCINP00000035104.1	GO:0005813 GO:0007346 GO:0030496
AIPGENE24487	TTC28	Tetratricopeptide repeat protein 28	Q96AY4	ENSCINP00000035104.1	GO:0005813 GO:0007346 GO:0030496
AIPGENE2837	TTC28	Tetratricopeptide repeat protein 28	Q80XJ3	ENSCINP00000035104.1	GO:0005813 GO:0007346 GO:0030496
AIPGENE5628	TTC28	Tetratricopeptide repeat protein 28	Q80XJ3	ENSCINP00000035104.1	GO:0005813 GO:0007346 GO:0030496
AIPGENE14019	TWK7	TWiK family of potassium channels protein 7	P34410	ENSCINP00000032062.1	GO:0005267 GO:0005887 GO:0006810 GO:0006811 GO:0016020 GO:0016021 GO:0022841 GO:0030322 GO:0071805
AIPGENE18751	TYR1	Putative tyrosinase-like protein tyr-1	P34269	ENSCINP00000022936.2
AIPGENE23409	TYRO	Tyrosinase	P55023	ENSCINP00000008838.3	GO:0008152 GO:0016491 GO:0046872 GO:0055114
AIPGENE27733	TYRO	Tyrosinase	P06845	ENSCINP00000008838.3	GO:0008152 GO:0016491 GO:0046872 GO:0055114
AIPGENE19907	U587	UPF0587 protein v1g245604	A7SJ66	ENSCINP00000032370.1
AIPGENE3226	UBA5	Ubiquitin-like modifier-activating enzyme 5	Q54C02	ENSCINP00000008729.3	GO:0005829 GO:0008641 GO:0061503 GO:0061504 GO:0071566 GO:0071569
AIPGENE20117	UBC23	Probable ubiquitin-conjugating enzyme E2 23	Q9ZVX1	ENSCINP00000023645.2
AIPGENE8282	UBP8	Ubiquitin carboxyl-terminal hydrolase 8	P40818	ENSCINP00000023650.2
AIPGENE12152	UROM	Uromodulin	Q862Z3	ENSCINP00000016476.3	GO:0005201 GO:0005509 GO:0005578
AIPGENE8196	UROM	Uromodulin	P07911	ENSCINP00000010391.3	GO:0005201 GO:0005509 GO:0005578
AIPGENE15989	USOM3	Uncharacterized skeletal organic matrix protein 3 (Fragment)	B8RJM0
AIPGENE5267	USOM5	Uncharacterized skeletal organic matrix protein 5	B8VIU6
AIPGENE13361	USOM7	Uncharacterized skeletal organic matrix protein 7	B8WI85
AIPGENE20926	VGFR2	Vascular endothelial growth factor receptor 2	P35918	ENSCINP00000015860.3	GO:0005509
AIPGENE27144	VIAAT	Vesicular inhibitory amino acid transporter	Q6PF45	ENSCINP00000017689.3	GO:0003333 GO:0015171 GO:0016020 GO:0016021
AIPGENE6809	VITRN	Vitrin	Q6UXI7	ENSCINP00000031657.1
AIPGENE8398	VITRN	Vitrin	Q8VHI5	ENSCINP00000001942.3	GO:0005509
AIPGENE17551	VKT1	Kunitz-type protease inhibitor AXPI-I	P81547	ENSCINP00000033091.1	GO:0004867 GO:0010951
AIPGENE18593	VLDLR	Very low-density lipoprotein receptor	P98166	ENSCINP00000031268.1	GO:0005509 GO:0016020 GO:0016021
AIPGENE5447	VP302	Venom protein 302	P0CJ14	ENSCINP00000031459.1
AIPGENE28851	WDR5B	WD repeat-containing protein 5B	Q5RE95	ENSCINP00000003013.3
AIPGENE25231	WHITE	Protein white	Q05360	ENSCINP00000031379.1
AIPGENE21314	WNT5B	Protein Wnt-5b	Q5NVK2	ENSCINP00000000747.3	GO:0005102 GO:0005109 GO:0005576 GO:0005578 GO:0005615 GO:0007275 GO:0016055 GO:0030182 GO:0045165
AIPGENE22302	WTIP	Wilms tumor protein 1-interacting protein homolog	A8DZE6	ENSCINP00000013640.3	GO:0008270 GO:0046872
AIPGENE19802	XDH	Xanthine dehydrogenase	P10351	ENSCINP00000031513.1	GO:0003824 GO:0004854 GO:0005506 GO:0005829 GO:0009055 GO:0009115 GO:0016491 GO:0016614 GO:0016903 GO:0046872 GO:0050660 GO:0051536 GO:0055114
AIPGENE10082	XERD	Integrase/recombinase xerD homolog	O50655
AIPGENE12154	Y3136	Clavaminate synthase-like protein At3g21360	Q9LIG0
AIPGENE12159	Y3136	Clavaminate synthase-like protein At3g21360	Q9LIG0
AIPGENE3623	Y381	Putative ankyrin repeat protein RF_0381	Q4UMH6	ENSCINP00000007941.3	GO:0016020 GO:0016021 GO:0019887 GO:0030165 GO:0045859
AIPGENE10923	Y928	Putative protein methyltransferase MJ0928	Q58338	ENSCINP00000025027.2	GO:0001510 GO:0008168 GO:0009452
AIPGENE4562	YH24	Putative aminopeptidase W07G4.4	Q27245	ENSCINP00000016449.3	GO:0004177 GO:0005622 GO:0005737 GO:0006508 GO:0008235 GO:0019538 GO:0030145
AIPGENE1862	YI31B	Transposon Ty3-I Gag-Pol polyprotein	Q7LHG5	ENSCINP00000003143.3
AIPGENE15713	YL126	Putative glutamine amidotransferase YLR126C	Q12288
AIPGENE11737	YL8A	Uncharacterized methyltransferase-like C25B8.10	Q9UTA8	ENSCINP00000017019.3
AIPGENE4330	YQJG	Glutathionyl-hydroquinone reductase YqjG	P42620	ENSCINP00000006796.3
AIPGENE26489	YRD6	Uncharacterized protein K02A2.6	Q09575	ENSCINP00000031157.1
AIPGENE8949	ZC3HF	Zinc finger CCCH domain-containing protein 15	Q8WU90	ENSCINP00000014158.3	GO:0046872
AIPGENE13023	ZCH24	Zinc finger CCHC domain-containing protein 24	B2RVL6	ENSCINP00000010380.3	GO:0003676 GO:0008270
AIPGENE14090	ZCH24	Zinc finger CCHC domain-containing protein 24	Q8N2G6	ENSCINP00000010380.3	GO:0003676 GO:0008270
AIPGENE3571	ZHANG	CREB/ATF bZIP transcription factor	Q91ZR3
AIPGENE22382	ZN665	Zinc finger protein 665	Q5R8X1	ENSCINP00000001925.3	GO:0003676 GO:0046872
AIPGENE17949	ZNT1	Zinc transporter 1	Q9Y6M5	ENSCINP00000022636.2
AIPGENE22170	ZPP	ZP domain-containing protein	G8HTB6	ENSCINP00000033680.1	GO:0016020 GO:0016021
AIPGENE10171	Predicted protein	Predicted protein	A7RWA9
AIPGENE10556	Predicted Protein	Predicted Protein
AIPGENE10722	Predicted Protein	Predicted Protein
AIPGENE10738	Predicted Protein	Predicted Protein
AIPGENE10743	Predicted protein	Predicted protein	V4A2K2
AIPGENE10749	Predicted protein	Predicted protein	A7SA07
AIPGENE10853	Predicted Protein	Predicted Protein
AIPGENE10867	Predicted Protein	Predicted Protein
AIPGENE1087	Predicted protein	Predicted protein	A7RFG4
AIPGENE1092	Predicted Protein	Predicted Protein
AIPGENE1126	Predicted Protein	Predicted Protein
AIPGENE11316	Predicted protein	Predicted protein	A7SUN8
AIPGENE11363	Predicted protein	Predicted protein	D2VQ64
AIPGENE11773	Predicted Protein	Predicted Protein
AIPGENE11891	Predicted protein	Predicted protein	A7SRT5
AIPGENE12286	Predicted Protein	Predicted Protein
AIPGENE12333	Predicted Protein	Predicted Protein
AIPGENE12420	Predicted Protein	Predicted Protein
AIPGENE12482	Predicted Protein	Predicted Protein
AIPGENE12565	Predicted protein	Predicted protein	A0A0B2V4Z1
AIPGENE12722	Predicted Protein	Predicted Protein
AIPGENE12737	Predicted protein	Predicted protein	A7SA89
AIPGENE12842	Predicted protein	Predicted protein	A7SP22
AIPGENE13174	Predicted Protein	Predicted Protein
AIPGENE13205	Predicted protein	Predicted protein	A7SDJ3
AIPGENE13212	Predicted Protein	Predicted Protein	KXJ30184.1
AIPGENE13407	Predicted Protein	Predicted Protein
AIPGENE13505	Predicted protein	Predicted protein	W4YV05
AIPGENE13688	Predicted protein	Predicted protein	A7S3A5	ENSCINP00000031518.1
AIPGENE13726	Predicted Protein	Predicted Protein
AIPGENE13864	Predicted Protein	Predicted Protein
AIPGENE13917	Predicted Protein	Predicted Protein
AIPGENE14010	Predicted Protein	Predicted Protein
AIPGENE14015	Predicted Protein	Predicted Protein
AIPGENE14027	Predicted Protein	Predicted Protein
AIPGENE14046	Predicted Protein	Predicted Protein
AIPGENE14095	Predicted Protein	Predicted Protein
AIPGENE14368	Predicted Protein	Predicted Protein
AIPGENE14420	Predicted Protein	Predicted Protein
AIPGENE1444	Predicted Protein	Predicted Protein
AIPGENE14518	Predicted Protein	Predicted Protein
AIPGENE14579	Predicted protein	Predicted protein	A7RFR8
AIPGENE14592	Predicted protein	Predicted protein	A7SFI3	ENSCINP00000008667.3
AIPGENE14740	Predicted protein	Predicted protein	V4AUI6
AIPGENE14971	Predicted protein	Predicted protein	A7RLZ2
AIPGENE15114	Predicted Protein	Predicted Protein
AIPGENE15194	Predicted protein	Predicted protein	A0A0D2WKZ7
AIPGENE15860	Predicted Protein	Predicted Protein
AIPGENE15979	Predicted Protein	Predicted Protein
AIPGENE16131	Predicted Protein	Predicted Protein
AIPGENE16164	Predicted Protein	Predicted Protein
AIPGENE16249	Predicted protein	Predicted protein	R7UA65
AIPGENE16293	Predicted Protein	Predicted Protein
AIPGENE16299	Predicted protein	Predicted protein	E7EXN5	ENSCINP00000034291.1
AIPGENE16386	Predicted protein	Predicted protein	B3RVQ7	ENSCINP00000035970.1	GO:0016020 GO:0016021
AIPGENE16397	Predicted protein	Predicted protein	A7RP72
AIPGENE16543	Predicted Protein	Predicted Protein
AIPGENE16566	Predicted Protein	Predicted Protein
AIPGENE16602	Predicted protein	Predicted protein	W5MY83
AIPGENE16932	Predicted Protein	Predicted Protein
AIPGENE16938	Predicted Protein	Predicted Protein
AIPGENE1705	Predicted Protein	Predicted Protein
AIPGENE17203	Predicted Protein	Predicted Protein
AIPGENE17481	Predicted Protein	Predicted Protein
AIPGENE1754	Predicted protein	Predicted protein	A7SG99
AIPGENE17637	Predicted protein	Predicted protein	Q0ZST9
AIPGENE17686	Predicted Protein	Predicted Protein
AIPGENE17762	Predicted protein	Predicted protein	A7RQQ0	ENSCINP00000032414.1
AIPGENE18002	Predicted Protein	Predicted Protein
AIPGENE18009	Predicted Protein	Predicted Protein
AIPGENE18029	Predicted Protein	Predicted Protein
AIPGENE18042	Predicted Protein	Predicted Protein
AIPGENE18102	Predicted Protein	Predicted Protein
AIPGENE18298	Predicted protein	Predicted protein	I1F319
AIPGENE18519	Predicted protein	Predicted protein	Q668S8
AIPGENE18557	Predicted protein	Predicted protein	A7SWR1
AIPGENE18567	Predicted Protein	Predicted Protein
AIPGENE18767	Predicted Protein	Predicted Protein
AIPGENE19197	Predicted protein	Predicted protein	C3ZTB7
AIPGENE19248	Predicted Protein	Predicted Protein
AIPGENE19267	Predicted Protein	Predicted Protein
AIPGENE19468	Predicted Protein	Predicted Protein
AIPGENE19811	Predicted Protein	Predicted Protein
AIPGENE20175	Predicted Protein	Predicted Protein
AIPGENE20176	Predicted Protein	Predicted Protein
AIPGENE2021	Predicted protein	Predicted protein	A7SD04
AIPGENE20214	Predicted Protein	Predicted Protein
AIPGENE2036	Predicted protein	Predicted protein	V4ARM9	ENSCINP00000018912.3
AIPGENE20726	Predicted protein	Predicted protein	C3Z8R0	ENSCINP00000032921.1	GO:0005802 GO:0016020 GO:0016021
AIPGENE20773	Predicted protein	Predicted protein	A7RTC9
AIPGENE21014	Predicted protein	Predicted protein	A7SIL6
AIPGENE21365	Predicted protein	Predicted protein	A7SA37	ENSCINP00000012169.3	GO:0004930 GO:0004935 GO:0005887 GO:0007186 GO:0007267 GO:0016020 GO:0016021 GO:0071880
AIPGENE21411	Predicted protein	Predicted protein	A7SGB4
AIPGENE21849	Predicted protein	Predicted protein	A7S9I2	ENSCINP00000024905.2
AIPGENE21926	Predicted Protein	Predicted Protein
AIPGENE22130	Predicted Protein	Predicted Protein
AIPGENE22416	Predicted protein	Predicted protein	A7S3Z2
AIPGENE22585	Predicted protein	Predicted protein	A7SR56
AIPGENE22726	Predicted Protein	Predicted Protein
AIPGENE22932	Predicted protein	Predicted protein	I1FDK4
AIPGENE23311	Predicted protein	Predicted protein	A7SGG2
AIPGENE23321	Predicted protein	Predicted protein	A7RJ46
AIPGENE23744	Predicted protein	Predicted protein	A7SMG6
AIPGENE23792	Predicted protein	Predicted protein	A7SVX9
AIPGENE23942	Predicted Protein	Predicted Protein
AIPGENE23975	Predicted Protein	Predicted Protein
AIPGENE24338	Predicted protein	Predicted protein	A7RSY4
AIPGENE24466	Predicted Protein	Predicted Protein
AIPGENE24682	Predicted Protein	Predicted Protein
AIPGENE25157	Predicted protein	Predicted protein	C3XUM9
AIPGENE25232	Predicted Protein	Predicted Protein
AIPGENE25329	Predicted Protein	Predicted Protein
AIPGENE26110	Predicted protein	Predicted protein	A7SC30
AIPGENE26147	Predicted Protein	Predicted Protein
AIPGENE26273	Predicted Protein	Predicted Protein
AIPGENE26285	Predicted protein	Predicted protein	A7SYZ2
AIPGENE26386	Predicted protein	Predicted protein	W4YMQ5
AIPGENE26401	Predicted protein	Predicted protein	B3S0V9
AIPGENE26413	Predicted protein	Predicted protein	A7RP09
AIPGENE26433	Predicted Protein	Predicted Protein
AIPGENE26443	Predicted protein	Predicted protein	A7RP09
AIPGENE26482	Predicted protein	Predicted protein	A7SR48
AIPGENE26506	Predicted protein	Predicted protein	K1QZ89
AIPGENE26586	Predicted protein	Predicted protein	A7RLT4
AIPGENE26594	Predicted protein	Predicted protein	A7S620
AIPGENE26614	Predicted protein	Predicted protein	A7RSD2
AIPGENE26659	Predicted Protein	Predicted Protein
AIPGENE26798	Predicted Protein	Predicted Protein
AIPGENE27025	Predicted Protein	Predicted Protein
AIPGENE27038	Predicted protein	Predicted protein	A7RLP7
AIPGENE27386	Predicted protein	Predicted protein	A7RN96
AIPGENE27397	Predicted protein	Predicted protein	A7S3J1
AIPGENE27441	Predicted Protein	Predicted Protein
AIPGENE27454	Predicted Protein	Predicted Protein
AIPGENE27869	Predicted protein	Predicted protein	A7SPS5
AIPGENE27895	Predicted Protein	Predicted Protein
AIPGENE28308	Predicted protein	Predicted protein	I1G5Y4	ENSCINP00000027071.2
AIPGENE28477	Predicted Protein	Predicted Protein
AIPGENE28713	Predicted protein	Predicted protein	V4C0Z0
AIPGENE28935	Predicted protein	Predicted protein	C3ZIV2
AIPGENE2904	Predicted Protein	Predicted Protein
AIPGENE2958	Predicted protein	Predicted protein	A7SA45
AIPGENE3065	Predicted protein	Predicted protein	I1FEN7
AIPGENE312	Predicted protein	Predicted protein	C3ZTQ4
AIPGENE3220	Predicted Protein	Predicted Protein
AIPGENE3269	Predicted protein	Predicted protein	A7RN39
AIPGENE3272	Predicted protein	Predicted protein	A7SPQ9
AIPGENE335	Predicted protein	Predicted protein	A0A084WKC9
AIPGENE3381	Predicted Protein	Predicted Protein
AIPGENE3398	Predicted protein	Predicted protein	A7RTL5
AIPGENE3677	Predicted protein	Predicted protein	A7SH61
AIPGENE3833	Predicted Protein	Predicted Protein
AIPGENE3851	Predicted Protein	Predicted Protein
AIPGENE3932	Predicted protein	Predicted protein	A7SW67
AIPGENE4137	Predicted Protein	Predicted Protein
AIPGENE4174	Predicted Protein	Predicted Protein
AIPGENE4204	Predicted protein	Predicted protein	A7RT43	ENSCINP00000021573.3	GO:0016020 GO:0016021
AIPGENE4210	Predicted Protein	Predicted Protein	KXJ22156.1		GO:0004672 GO:0005524 GO:0006468 GO:0016020 GO:0016021
AIPGENE4213	Predicted Protein	Predicted Protein	KXJ22189.1
AIPGENE4240	Predicted protein	Predicted protein	A7RS57
AIPGENE4275	Predicted Protein	Predicted Protein
AIPGENE4611	Predicted Protein	Predicted Protein	KXJ11150.1		GO:0000166 GO:0004672 GO:0004713 GO:0004715 GO:0005102 GO:0005524 GO:0006468 GO:0007169 GO:0016301 GO:0016310 GO:0016740 GO:0030154 GO:0031234 GO:0038083 GO:0042127 GO:0045087
AIPGENE4678	Predicted Protein	Predicted Protein
AIPGENE4800	Predicted protein	Predicted protein	K1R495
AIPGENE4835	Predicted Protein	Predicted Protein
AIPGENE5210	Predicted Protein	Predicted Protein
AIPGENE5319	Predicted protein	Predicted protein	A7SA89
AIPGENE5343	Predicted protein	Predicted protein	A7SA89
AIPGENE5354	Predicted protein	Predicted protein	A7SMP6
AIPGENE5409	Predicted protein	Predicted protein	A7SA37
AIPGENE5643	Predicted Protein	Predicted Protein
AIPGENE5777	Predicted Protein	Predicted Protein
AIPGENE6201	Predicted Protein	Predicted Protein
AIPGENE6301	Predicted Protein	Predicted Protein
AIPGENE648	Predicted protein	Predicted protein	A7SRP0
AIPGENE6480	Predicted protein	Predicted protein	A7S4R8
AIPGENE6761	Predicted Protein	Predicted Protein
AIPGENE6765	Predicted protein	Predicted protein	A7SXP8
AIPGENE6817	Predicted protein	Predicted protein	A7SR51
AIPGENE6831	Predicted protein	Predicted protein	W4XJ24
AIPGENE6863	Predicted Protein	Predicted Protein
AIPGENE7096	Predicted protein	Predicted protein	V4AUI6
AIPGENE7356	Predicted Protein	Predicted Protein
AIPGENE7545	Predicted Protein	Predicted Protein
AIPGENE761	Predicted Protein	Predicted Protein
AIPGENE7613	Predicted Protein	Predicted Protein
AIPGENE764	Predicted protein	Predicted protein	A7SIQ2
AIPGENE7703	Predicted protein	Predicted protein	Q580E4
AIPGENE784	Predicted Protein	Predicted Protein
AIPGENE7924	Predicted protein	Predicted protein	A7RWA9
AIPGENE7992	Predicted protein	Predicted protein	A0A0C5GWD8
AIPGENE8130	Predicted Protein	Predicted Protein
AIPGENE8218	Predicted protein	Predicted protein	A7RUC8	ENSCINP00000007943.3	GO:0016020 GO:0016021
AIPGENE8310	Predicted Protein	Predicted Protein
AIPGENE8385	Predicted Protein	Predicted Protein
AIPGENE8391	Predicted protein	Predicted protein	A7SP95
AIPGENE8585	Predicted protein	Predicted protein	A7S659
AIPGENE8631	Predicted Protein	Predicted Protein
AIPGENE8653	Predicted protein	Predicted protein	A7SZJ7
AIPGENE8654	Predicted Protein	Predicted Protein
AIPGENE8674	Predicted protein	Predicted protein	R7RXF9
AIPGENE9263	Predicted protein	Predicted protein	A7SFP2
AIPGENE9289	Predicted protein	Predicted protein	A7SFI3	ENSCINP00000008667.3
AIPGENE9919	Predicted protein	Predicted protein	A7SIY5	ENSCINP00000020132.3	GO:0005886 GO:0007411 GO:0016020 GO:0016021 GO:0046875 GO:0048013
AIPGENE994	Predicted Protein	Predicted Protein
AIPGENE9982	Predicted protein	Predicted protein	A7SKQ0

## Sheet: Table S3. apo_specificDEGs
E. diaphana geneID	Gene name	Discription	UniprotID	C. intestinalis geneID	GOID
AIPGENE19170	ACBC	2-epi-5-epi-valiolone synthase	Q9ZAE9	ENSCINP00000031198.1	GO:0005576 GO:0006030 GO:0008061
AIPGENE13105	ACES	Acetylcholinesterase	Q92035	ENSCINP00000009596.3	GO:0004104 GO:0005615 GO:0016787 GO:0052689
AIPGENE18473	ACES	Acetylcholinesterase	Q92035	ENSCINP00000031848.1
AIPGENE8252	ACTC	Actin, cytoplasmic	Q964E3	ENSCINP00000001538.3	GO:0000166 GO:0005524
AIPGENE28991	ADA23	Disintegrin and metalloproteinase domain-containing protein 23	O75077	ENSCINP00000018188.3	GO:0004222 GO:0005578 GO:0006508 GO:0008237 GO:0008270 GO:0031012
AIPGENE20164	ADPRM	Manganese-dependent ADP-ribose/CDP-alcohol diphosphatase	Q7T291
AIPGENE5443	AGRD1	Adhesion G-protein coupled receptor D1	A6QLU6	ENSCINP00000000119.2	GO:0004888 GO:0004930 GO:0007166 GO:0007186 GO:0016020 GO:0016021
AIPGENE1872	AGRIN	Agrin	P31696
AIPGENE9489	AHSA1	Activator of 90 kDa heat shock protein ATPase homolog 1	O95433
AIPGENE20746	ANPRA	Atrial natriuretic peptide receptor 1	P16066	ENSCINP00000002159.3	GO:0000166 GO:0004383 GO:0004672 GO:0005524 GO:0005886 GO:0006182 GO:0006468 GO:0007165 GO:0008074 GO:0009190 GO:0016020 GO:0016021 GO:0016829 GO:0016849 GO:0035556
AIPGENE23774	ANT1	Major antigen	P21249
AIPGENE20759	AOC1	Amiloride-sensitive amine oxidase [copper-containing]	P36633
AIPGENE15174	AQP10	Aquaporin-10	Q96PS8	ENSCINP00000007510.3	GO:0005215 GO:0005887 GO:0006810 GO:0006833 GO:0009992 GO:0015250 GO:0015254 GO:0015793 GO:0016020 GO:0016021 GO:0034220
AIPGENE13552	ARF4	ADP-ribosylation factor 4	P51644	ENSCINP00000035274.1
AIPGENE347	ASIC1	Acid-sensing ion channel 1	Q7T1N4	ENSCINP00000013699.3	GO:0005272 GO:0006810 GO:0006811 GO:0006814 GO:0016020 GO:0016021 GO:0035725
AIPGENE17868	AT2A3	Sarcoplasmic/endoplasmic reticulum calcium ATPase 3	Q9YGL9	ENSCINP00000032608.1
AIPGENE27621	AT2B3	Plasma membrane calcium-transporting ATPase 3	Q16720	ENSCINP00000006789.3	GO:0000166 GO:0005388 GO:0005524 GO:0005887 GO:0006810 GO:0006811 GO:0006816 GO:0016020 GO:0016021 GO:0016787 GO:0030165 GO:0043231 GO:0046872 GO:0051480 GO:0070588
AIPGENE4491	ATK4	Kinesin-4	O81635	ENSCINP00000031156.1
AIPGENE2428	B4GN4	N-acetyl-beta-glucosaminyl-glycoprotein 4-beta-N-acetylgalactosaminyltransferase 1	Q76KP1	ENSCINP00000028502.2	GO:0008376 GO:0032580
AIPGENE27791	B561I	Cytochrome b561 and DOMON domain-containing protein At3g61750	Q9M363	ENSCINP00000017029.3
AIPGENE9079	BARX2	Homeobox protein BarH-like 2	Q9UMQ3	ENSCINP00000024460.2	GO:0003677 GO:0005634 GO:0006355 GO:0043565
AIPGENE19340	BTBDG	BTB/POZ domain-containing protein 16	Q95J53	ENSCINP00000000856.3
AIPGENE13497	C163A	Scavenger receptor cysteine-rich type 1 protein M130	Q2VLG6	ENSCINP00000013067.3	GO:0005044 GO:0005507 GO:0006898 GO:0016020 GO:0016641 GO:0055114
AIPGENE17207	C209D	CD209 antigen-like protein D	Q91ZW8	ENSCINP00000004174.3	GO:0016020 GO:0016021
AIPGENE19720	CAH2	Carbonic anhydrase 2	Q8UWA5	ENSCINP00000026304.2
AIPGENE5302	CAH2	Carbonic anhydrase 2	Q8UWA5	ENSCINP00000002042.3
AIPGENE25923	CALUB	Calumenin-B	B5X4E0	ENSCINP00000025165.2	GO:0005509
AIPGENE7715	CAS4	Short-chain collagen C4 (Fragment)	P18503	ENSCINP00000030234.1
AIPGENE27988	CB070	UPF0573 protein C2orf70 homolog	A4II40	ENSCINP00000015826.3
AIPGENE20910	CEAM1	Carcinoembryonic antigen-related cell adhesion molecule 1	P31809	ENSCINP00000015860.3	GO:0005509
AIPGENE15266	CH10	10 kDa heat shock protein, mitochondrial	Q5DC69	ENSCINP00000029870.1
AIPGENE22859	CKAP5	Cytoskeleton-associated protein 5	Q14008	ENSCINP00000015580.3
AIPGENE6519	CLIP1	CAP-Gly domain-containing linker protein 1	P30622	ENSCINP00000031236.1
AIPGENE18703	CNBD2	Cyclic nucleotide-binding domain-containing protein 2	Q95JR6	ENSCINP00000031008.1
AIPGENE7770	CNG3	Cyclic nucleotide-gated channel rod photoreceptor subunit alpha	Q90980	ENSCINP00000014322.3	GO:0005216 GO:0005249 GO:0005887 GO:0006810 GO:0006811 GO:0006813 GO:0016020 GO:0016021 GO:0034220 GO:0042391 GO:0055085 GO:0071805
AIPGENE10284	CO6A3	Collagen alpha-3(VI) chain	P15989	ENSCINP00000031657.1
AIPGENE12342	CO6A3	Collagen alpha-3(VI) chain	P12111	ENSCINP00000031657.1
AIPGENE10288	CO6A4	Collagen alpha-4(VI) chain	A2AX52	ENSCINP00000031657.1
AIPGENE6806	CO6A5	Collagen alpha-5(VI) chain	A8TX70	ENSCINP00000031657.1
AIPGENE12362	CO6A6	Collagen alpha-6(VI) chain	A6NMZ7	ENSCINP00000031657.1
AIPGENE22178	CO6A6	Collagen alpha-6(VI) chain	A6NMZ7	ENSCINP00000031657.1
AIPGENE6812	CO6A6	Collagen alpha-6(VI) chain	A6NMZ7	ENSCINP00000035113.1
AIPGENE15734	COCA1	Collagen alpha-1(XII) chain	P13944	ENSCINP00000032368.1	GO:0070492
AIPGENE26829	COTL1	Coactosin-like protein	Q2HJ57
AIPGENE4564	COX15	Cytochrome c oxidase assembly protein COX15 homolog	Q8BJ03	ENSCINP00000001332.3	GO:0004129 GO:0005743 GO:0006784 GO:0008535 GO:0016020 GO:0016021 GO:0016627 GO:0016653 GO:0055114 GO:1902600
AIPGENE14884	COXM2	COX assembly mitochondrial protein 2 homolog	Q8K199	ENSCINP00000026936.2
AIPGENE23936	CP3A4	Cytochrome P450 3A4	P08684	ENSCINP00000035581.1	GO:0004497 GO:0005506 GO:0016020 GO:0016021 GO:0016491 GO:0016705 GO:0020037 GO:0046872 GO:0055114
AIPGENE27959	CR3L1	Cyclic AMP-responsive element-binding protein 3-like protein 1	Q96BA8	ENSCINP00000011026.3	GO:0003700 GO:0006355 GO:0043565
AIPGENE23405	CR3L2	Cyclic AMP-responsive element-binding protein 3-like protein 2	A1L224	ENSCINP00000011026.3	GO:0003700 GO:0006355 GO:0043565
AIPGENE25182	CRA1B	Collagen alpha-1(XXVII) chain B	A0MSJ1	ENSCINP00000016017.3
AIPGENE10590	CRIP1	Cysteine-rich protein 1	P50238	ENSCINP00000033008.1	GO:0008270 GO:0046872
AIPGENE7094	CRY1	Cryptochrome-1	Q16526
AIPGENE22361	CSD	Probable cysteine desulfurase	O27442
AIPGENE1345	CSGA	C-factor	P21158	ENSCINP00000010325.3	GO:0016491 GO:0055114
AIPGENE7912	CSMD3	CUB and sushi domain-containing protein 3	Q7Z407	ENSCINP00000006993.3
AIPGENE8956	CSPG2	Versican core protein (Fragments)	Q9ERB4	ENSCINP00000006010.3	GO:0005509 GO:0005886 GO:0007155 GO:0007156 GO:0016020 GO:0016021
AIPGENE28323	CSRP2	Cysteine and glycine-rich protein 2	Q05158	ENSCINP00000035257.1	GO:0008270 GO:0046872
AIPGENE4505	CSTF3	Cleavage stimulation factor subunit 3	Q5RDW9	ENSCINP00000013211.3	GO:0003729 GO:0005634 GO:0006379 GO:0006396 GO:0006397 GO:0031123
AIPGENE24288	CTRL	Chymotrypsin-like protease CTRL-1	P40313	ENSCINP00000013976.2	GO:0004252 GO:0006508 GO:0008233 GO:0008236 GO:0016787
AIPGENE122	CUBN	Cubilin	O70244	ENSCINP00000007799.3	GO:0004222 GO:0005509 GO:0006508 GO:0008233 GO:0008237 GO:0008270 GO:0016787 GO:0046872
AIPGENE5546	CY24B	Cytochrome b-245 heavy chain	Q61093	ENSCINP00000008272.3	GO:0016020 GO:0016021 GO:0016491 GO:0055114
AIPGENE4733	DBP	D site-binding protein	P16443	ENSCINP00000004693.3	GO:0003700 GO:0006355 GO:0043565
AIPGENE28483	DCA11	DDB1- and CUL4-associated factor 11	Q5E9I8	ENSCINP00000013358.3	GO:0005682 GO:0008380 GO:0071011 GO:0071013
AIPGENE15570	DCAF8	DDB1- and CUL4-associated factor 8	Q28I90	ENSCINP00000008889.3
AIPGENE17925	DD3	Protein DD3-3	Q58A42	ENSCINP00000028120.2
AIPGENE1051	DEAF1	Deformed epidermal autoregulatory factor 1	Q24180	ENSCINP00000015236.3	GO:0003677 GO:0003700 GO:0005634 GO:0006357 GO:0046872 GO:2000026
AIPGENE14367	DMBT1	Deleted in malignant brain tumors 1 protein	Q9UGM3	ENSCINP00000013067.3	GO:0005044 GO:0005507 GO:0006898 GO:0016020 GO:0016641 GO:0055114
AIPGENE22679	DMD	Dystrophin	P11533
AIPGENE22701	DMD	Dystrophin	P11531	ENSCINP00000018184.3
AIPGENE8405	DNPEP	Aspartyl aminopeptidase	Q5RBT2	ENSCINP00000030453.1	GO:0004177 GO:0006508 GO:0008233 GO:0008237 GO:0008270 GO:0016787 GO:0046872
AIPGENE17437	DOX2	Alpha-dioxygenase 2	Q9C9U3	ENSCINP00000009017.3	GO:0004601 GO:0005509 GO:0006979 GO:0016020 GO:0016021 GO:0020037 GO:0055114 GO:0098869
AIPGENE15774	DPS1	Decaprenyl-diphosphate synthase subunit 1	Q5T2R2	ENSCINP00000002476.3	GO:0008299 GO:0016740
AIPGENE12166	DRG1	Developmentally-regulated GTP-binding protein 1	P43690	ENSCINP00000006782.3	GO:0005525
AIPGENE28094	E2F3	Transcription factor E2F3	O35261	ENSCINP00000030840.1	GO:0003677 GO:0003700 GO:0005634 GO:0005667 GO:0006351 GO:0006355
AIPGENE19051	ECE1	Endothelin-converting enzyme 1	P42893	ENSCINP00000011815.3	GO:0004222 GO:0006508 GO:0008237
AIPGENE6882	ECE1	Endothelin-converting enzyme 1	P42893	ENSCINP00000011815.3	GO:0004222 GO:0006508 GO:0008237
AIPGENE13723	ECE2	Endothelin-converting enzyme 2	Q80Z60	ENSCINP00000011815.3	GO:0004222 GO:0006508 GO:0008237
AIPGENE18973	ECE2	Endothelin-converting enzyme 2	O60344	ENSCINP00000031762.1	GO:0004222 GO:0006508 GO:0008237
AIPGENE4699	ECI2	Enoyl-CoA delta isomerase 2, mitochondrial	Q5XIC0	ENSCINP00000011768.3	GO:0000062 GO:0003824 GO:0008152
AIPGENE29237	EDIL3	EGF-like repeat and discoidin I-like domain-containing protein 3	O35474	ENSCINP00000006532.3	GO:0005509
AIPGENE21355	ELAV3	ELAV-like protein 3	Q91584	ENSCINP00000009765.3	GO:0000166 GO:0003676 GO:0003723
AIPGENE2247	ERGI1	Endoplasmic reticulum-Golgi intermediate compartment protein 1	Q4V8Y6	ENSCINP00000008339.3	GO:0016020 GO:0016021
AIPGENE9786	EZRI	Ezrin	P31976	ENSCINP00000025580.2	GO:0003779 GO:0005737 GO:0005856 GO:0008092 GO:0019898
AIPGENE7227	FA11	Coagulation factor XI	Q91Y47	ENSCINP00000007068.3	GO:0004252 GO:0005509 GO:0006508 GO:0008233 GO:0008236 GO:0016787
AIPGENE2779	FA5V	Venom prothrombin activator pseutarin-C non-catalytic subunit	Q7SZN0	ENSCINP00000019787.3
AIPGENE26162	FAD5	Delta(5) fatty acid desaturase	O74212
AIPGENE27752	FAT4	Protocadherin Fat 4	Q2PZL6	ENSCINP00000006010.3	GO:0005509 GO:0005886 GO:0007155 GO:0007156 GO:0016020 GO:0016021
AIPGENE5865	FBP1	Fibropellin-1	P10079	ENSCINP00000001293.2	GO:0005509
AIPGENE11620	FOLH1	Glutamate carboxypeptidase 2	O35409	ENSCINP00000014713.3
AIPGENE14286	FOLH1	Glutamate carboxypeptidase 2	O35409	ENSCINP00000011038.3	GO:0016020 GO:0016021
AIPGENE14305	FOLH1	Glutamate carboxypeptidase 2	O77564	ENSCINP00000014713.3
AIPGENE27957	FOLH1	Glutamate carboxypeptidase 2	O35409	ENSCINP00000011038.3	GO:0016020 GO:0016021
AIPGENE11097	FUCL	Fucolectin	Q7SIC1
AIPGENE24084	FXRD2	FAD-dependent oxidoreductase domain-containing protein 2	Q8IWF2	ENSCINP00000013723.3	GO:0004497 GO:0005788 GO:0016491 GO:0030433 GO:0055114
AIPGENE4017	FZD7B	Frizzled-7-B	Q8AVJ9	ENSCINP00000016965.3	GO:0007166 GO:0007275 GO:0016020 GO:0016021 GO:0016055 GO:0042813 GO:0060070
AIPGENE1086	GABR2	Gamma-aminobutyric acid type B receptor subunit 2	O75899	ENSCINP00000006905.3	GO:0004930 GO:0004965 GO:0007186 GO:0016020 GO:0016021
AIPGENE7219	GABR2	Gamma-aminobutyric acid type B receptor subunit 2	O88871	ENSCINP00000006905.3	GO:0004930 GO:0004965 GO:0007186 GO:0016020 GO:0016021
AIPGENE14619	GAPR1	Golgi-associated plant pathogenesis-related protein 1	Q9CYL5	ENSCINP00000010145.3	GO:0005576
AIPGENE1513	GAPR1	Golgi-associated plant pathogenesis-related protein 1	Q9H4G4	ENSCINP00000001814.3	GO:0005576
AIPGENE15674	GCDH	Glutaryl-CoA dehydrogenase, mitochondrial	Q2KHZ9	ENSCINP00000013343.3	GO:0000062 GO:0003995 GO:0005739 GO:0008152 GO:0009055 GO:0016491 GO:0016627 GO:0033539 GO:0050660 GO:0052890 GO:0055088 GO:0055114
AIPGENE10496	GCH1	GTP cyclohydrolase 1	Q19980	ENSCINP00000008998.3	GO:0003934 GO:0005525 GO:0005737 GO:0006729 GO:0008270 GO:0046654
AIPGENE29213	GELS1	Gelsolin-like protein 1	Q7JQD3	ENSCINP00000003800.3	GO:0003779 GO:0007010
AIPGENE29236	GELS1	Gelsolin-like protein 1	Q7JQD3	ENSCINP00000022359.2
AIPGENE8881	GGLO	L-gulonolactone oxidase	Q90YK3	ENSCINP00000035375.1	GO:0003885 GO:0016020 GO:0055114
AIPGENE25057	GLBL3	Beta-galactosidase-1-like protein 3	Q8NCI6	ENSCINP00000024468.2	GO:0004553 GO:0004565 GO:0005773 GO:0005975 GO:0008152 GO:0016787 GO:0016798
AIPGENE18788	GLTP	Glycolipid transfer protein	B0YN54	ENSCINP00000002896.3	GO:0005737 GO:0017089 GO:0046836 GO:0051861
AIPGENE12935	GP161	G-protein coupled receptor 161	B2RPY5	ENSCINP00000019971.3	GO:0004871 GO:0004930 GO:0005887 GO:0007165 GO:0007166 GO:0007186 GO:0016020 GO:0016021
AIPGENE10925	GPR98	G-protein coupled receptor 98	Q6JAN0	ENSCINP00000012945.3	GO:0005432 GO:0006816 GO:0007154 GO:0016020 GO:0016021 GO:0035725 GO:0055085
AIPGENE11030	GPR98	G-protein coupled receptor 98	Q8VHN7	ENSCINP00000011103.2
AIPGENE24677	GRIA2	Glutamate receptor 2	P19491	ENSCINP00000017550.3
AIPGENE6351	GSTM5	Glutathione S-transferase Mu 5	Q9Z1B2	ENSCINP00000022076.2	GO:0004364 GO:0008152
AIPGENE12054	GTR1	Glucose transporter type 1	Q8IRI6	ENSCINP00000003472.3	GO:0005215 GO:0006810 GO:0016020 GO:0016021 GO:0022857 GO:0022891 GO:0055085
AIPGENE6136	H3	Histone H3	P84239	ENSCINP00000005615.3	GO:0000786 GO:0003677 GO:0005634 GO:0005694 GO:0046982
AIPGENE26271	HES1A	Transcription factor HES-1-A	Q6IRB2	ENSCINP00000010322.3	GO:0003677 GO:0005634 GO:0006351 GO:0006355 GO:0046983
AIPGENE11333	HLF	Hepatic leukemia factor	Q16534	ENSCINP00000016562.3	GO:0000122 GO:0001078 GO:0003700 GO:0005634 GO:0006355 GO:0007623 GO:0043565
AIPGENE11126	HMCN1	Hemicentin-1	Q96RW7	ENSCINP00000015858.3	GO:0005509
AIPGENE19491	HMCN1	Hemicentin-1	Q96RW7	ENSCINP00000015860.3	GO:0005509
AIPGENE25044	HMCN2	Hemicentin-2	Q8NDA2	ENSCINP00000015858.3	GO:0005509
AIPGENE20646	HMU	Halomucin	Q18DN4
AIPGENE20749	ICE2	Little elongation complex subunit 2	Q659A1
AIPGENE8006	IF4E	Eukaryotic translation initiation factor 4E	P63074	ENSCINP00000008672.3	GO:0003723 GO:0003743 GO:0005737 GO:0006412 GO:0006413
AIPGENE27755	IMSP1	Insoluble matrix shell protein 1 (Fragment)	P86982
AIPGENE10893	IQCH	IQ domain-containing protein H	Q9D2K4	ENSCINP00000006749.3
AIPGENE10972	K1161	Uncharacterized family 31 glucosidase KIAA1161	Q69ZQ1	ENSCINP00000032199.1	GO:0003824 GO:0004553 GO:0005975 GO:0008152 GO:0016787 GO:0016798
AIPGENE1479	KCNA1	Potassium voltage-gated channel subfamily A member 1	Q09470	ENSCINP00000023220.2
AIPGENE25654	KCNK9	Potassium channel subfamily K member 9	Q63ZI0	ENSCINP00000032062.1	GO:0005267 GO:0005887 GO:0006810 GO:0006811 GO:0016020 GO:0016021 GO:0022841 GO:0030322 GO:0071805
AIPGENE18117	KDM4A	Lysine-specific demethylase 4A	Q8BW72	ENSCINP00000004028.3	GO:0005634 GO:0008270 GO:0046872
AIPGENE1019	KIF27	Kinesin-like protein KIF27	Q7M6Z4
AIPGENE1057	KIF27	Kinesin-like protein KIF27	Q7M6Z5	ENSCINP00000023041.2	GO:0000166 GO:0003777 GO:0005524 GO:0005874 GO:0007018 GO:0008017
AIPGENE28503	KIF7	Kinesin-like protein kif7	Q58G59
AIPGENE4464	L12R1	Loss of heterozygosity 12 chromosomal region 1 protein	Q969J3
AIPGENE530	LIPR2	Pancreatic lipase-related protein 2	P81139	ENSCINP00000014633.3	GO:0004806 GO:0005576 GO:0006629 GO:0052689
AIPGENE10774	LONF3	LON peptidase N-terminal domain and RING finger protein 3	Q9D4H7	ENSCINP00000026615.2
AIPGENE23304	LONF3	LON peptidase N-terminal domain and RING finger protein 3	Q9D4H7	ENSCINP00000026615.2
AIPGENE11163	LONP2	Lon protease homolog 2, peroxisomal	Q5PQY6	ENSCINP00000018649.3	GO:0000166 GO:0003697 GO:0004176 GO:0004252 GO:0005524 GO:0005759 GO:0006508 GO:0006515 GO:0007005 GO:0008233 GO:0008236 GO:0016787 GO:0016887 GO:0030163 GO:0034599 GO:0043565 GO:0051131 GO:0070361 GO:0070407 GO:0090296
AIPGENE25932	LPHN3	Latrophilin-3	Q9HAR2	ENSCINP00000011539.3	GO:0004871 GO:0004888 GO:0004930 GO:0005509 GO:0005886 GO:0007155 GO:0007156 GO:0007165 GO:0007166 GO:0007186 GO:0016020 GO:0016021
AIPGENE29099	LRRC9	Leucine-rich repeat-containing protein 9	A0JM56	ENSCINP00000000977.3
AIPGENE27103	LRWD1	Leucine-rich repeat and WD repeat-containing protein 1	B0JZ65	ENSCINP00000034343.1
AIPGENE24766	LTXA	Leukotoxin	P16462
AIPGENE23317	MASY	Malate synthase	P95329
AIPGENE868	MATN1	Cartilage matrix protein	P05099	ENSCINP00000026363.2
AIPGENE2457	MCFD2	Multiple coagulation factor deficiency protein 2 homolog	Q8K5B3	ENSCINP00000034523.1
AIPGENE1364	MEP1B	Meprin A subunit beta	Q16820	ENSCINP00000017083.3	GO:0004222 GO:0006508 GO:0008233 GO:0008237 GO:0008270 GO:0016020 GO:0016787 GO:0046872
AIPGENE20636	METK2	S-adenosylmethionine synthase isoform type-2	Q3THS6	ENSCINP00000016717.3	GO:0000166 GO:0004478 GO:0005524 GO:0005829 GO:0006556 GO:0006730 GO:0016740 GO:0046872
AIPGENE6603	MFGM	Lactadherin	P70490	ENSCINP00000019787.3
AIPGENE13503	MLP	Mucin-like protein (Fragment)	B3EWY9	ENSCINP00000010385.3	GO:0005201 GO:0005509 GO:0005578
AIPGENE21137	MLP	Mucin-like protein (Fragment)	B3EWY9	ENSCINP00000029354.2
AIPGENE28803	MLP	Mucin-like protein (Fragment)	B3EWY9	ENSCINP00000001964.3	GO:0005509
AIPGENE28887	MLP	Mucin-like protein (Fragment)	B3EWY9	ENSCINP00000029354.2
AIPGENE5096	MLP	Mucin-like protein (Fragment)	B3EWY9	ENSCINP00000026365.2
AIPGENE11485	MLRP1	MAM and LDL-receptor class A domain-containing protein 1 (Fragment)	B3EWZ5	ENSCINP00000036530.1	GO:0016020
AIPGENE11469	MLRP2	MAM and LDL-receptor class A domain-containing protein 2 (Fragment)	B3EWZ6	ENSCINP00000033374.1	GO:0016020
AIPGENE21266	MLRP2	MAM and LDL-receptor class A domain-containing protein 2 (Fragment)	B3EWZ6	ENSCINP00000024995.2	GO:0016020
AIPGENE22528	MMGT1	Membrane magnesium transporter 1	Q8N4V1
AIPGENE2967	MOXD1	DBH-like monooxygenase protein 1 homolog	Q5TZ24	ENSCINP00000032889.1
AIPGENE15096	MOXD2	DBH-like monooxygenase protein 2 homolog	Q08CS6	ENSCINP00000005555.3	GO:0003824 GO:0004497 GO:0005507 GO:0016715 GO:0055114
AIPGENE331	MRC1	Macrophage mannose receptor 1	P22897	ENSCINP00000004174.3	GO:0016020 GO:0016021
AIPGENE14071	MUC5B	Mucin-5B	Q9HC84	ENSCINP00000035305.1
AIPGENE4552	MUC5B	Mucin-5B	Q9HC84	ENSCINP00000035305.1
AIPGENE8390	MUP4	Transmembrane matrix receptor MUP-4	Q21281	ENSCINP00000026434.2
AIPGENE16461	MYL6B	Myosin light chain 6B	P14649	ENSCINP00000009959.3	GO:0005509
AIPGENE23854	MYO1D	Unconventional myosin-Id	Q63357	ENSCINP00000018059.3	GO:0000166 GO:0003774 GO:0003779 GO:0005524 GO:0016459
AIPGENE8265	MYS	Myosin heavy chain, striated muscle	P24733	ENSCINP00000036000.1
AIPGENE18853	NID1	Nidogen-1	P14543	ENSCINP00000010385.3	GO:0005201 GO:0005509 GO:0005578
AIPGENE26957	NID1	Nidogen-1	P10493	ENSCINP00000024948.2	GO:0005509 GO:0016020 GO:0016021
AIPGENE18468	NLGNX	Neuroligin-4, X-linked	Q8N0W4	ENSCINP00000017593.3	GO:0005615 GO:0016787 GO:0052689
AIPGENE18542	NLGNX	Neuroligin-4, X-linked	Q8N0W4	ENSCINP00000034802.1	GO:0005615 GO:0016787 GO:0052689
AIPGENE13702	NNMT	Nicotinamide N-methyltransferase	O55239
AIPGENE3676	NOGG	Noggin	P97466	ENSCINP00000002170.2	GO:0001501 GO:0001649 GO:0005615 GO:0007399 GO:0030514 GO:0045596
AIPGENE1433	NRP2	Neuropilin-2	O35375	ENSCINP00000019787.3
AIPGENE10916	NT5D3	5'-nucleotidase domain-containing protein 3	Q86UY8	ENSCINP00000017103.3	GO:0008253 GO:0016311 GO:0046872
AIPGENE21041	NUD14	Uridine diphosphate glucose pyrophosphatase	Q05B60	ENSCINP00000022311.2	GO:0016787 GO:0016818 GO:0046872
AIPGENE12702	OPSD	Rhodopsin	O93459	ENSCINP00000000739.3	GO:0004871 GO:0004930 GO:0005887 GO:0007165 GO:0007186 GO:0007187 GO:0007218 GO:0007268 GO:0016020 GO:0016021 GO:0042923 GO:0043005
AIPGENE24046	OPSD1	Rhodopsin, GQ-coupled	O15973	ENSCINP00000030239.1
AIPGENE11859	ORCT	Organic cation transporter protein	Q9VCA2	ENSCINP00000015651.3	GO:0005215 GO:0016020 GO:0016021 GO:0022857 GO:0022891 GO:0055085
AIPGENE17500	ORCT	Organic cation transporter protein	Q9VCA2	ENSCINP00000015651.3	GO:0005215 GO:0016020 GO:0016021 GO:0022857 GO:0022891 GO:0055085
AIPGENE19791	ORCT	Organic cation transporter protein	Q9VCA2	ENSCINP00000027190.2
AIPGENE26154	ORCT	Organic cation transporter protein	Q9VCA2	ENSCINP00000020124.3	GO:0005887 GO:0016020 GO:0016021 GO:0022857 GO:0022891 GO:0055085
AIPGENE22267	PAO	Polyamine oxidase	O64411	ENSCINP00000021792.2	GO:0016491 GO:0055114
AIPGENE20939	PCFT	Proton-coupled folate transporter	Q6DCX5	ENSCINP00000001721.3	GO:0016020 GO:0016021 GO:0055085
AIPGENE4302	PDPK1	3-phosphoinositide-dependent protein kinase 1	O55173	ENSCINP00000014529.3
AIPGENE954	PKDRE	Polycystic kidney disease and receptor for egg jelly-related protein	Q9NTG1	ENSCINP00000035440.1	GO:0001822 GO:0005262 GO:0016020 GO:0016021 GO:0050982 GO:0070588
AIPGENE1824	PNPO	Pyridoxine-5'-phosphate oxidase	Q5E9K3	ENSCINP00000011903.3	GO:0004733 GO:0008615 GO:0010181 GO:0016491 GO:0016638 GO:0042823 GO:0055114
AIPGENE25457	POL3	Retrovirus-related Pol polyprotein from transposon 17.6	P04323	ENSCINP00000036259.1	GO:0003676 GO:0008270 GO:0015074
AIPGENE18031	PPR32	Protein phosphatase 1 regulatory subunit 32	Q2T9T0	ENSCINP00000020145.3
AIPGENE17583	PROP	Properdin	P27918	ENSCINP00000015672.3	GO:0005509 GO:0005576 GO:0007155
AIPGENE19952	PROSC	Proline synthase co-transcribed bacterial homolog protein	O94903	ENSCINP00000004257.3	GO:0005622 GO:0030170
AIPGENE12138	PRSS8	Prostasin	Q16651	ENSCINP00000002671.3	GO:0004252 GO:0006508 GO:0008233 GO:0008236 GO:0016787
AIPGENE19805	PTHD3	Patched domain-containing protein 3	Q0EEE2	ENSCINP00000008700.3	GO:0005319 GO:0006869 GO:0016020 GO:0016021
AIPGENE6151	PTPRA	Receptor-type tyrosine-protein phosphatase alpha	P18052	ENSCINP00000030681.1	GO:0004721 GO:0004725 GO:0006470 GO:0016020 GO:0016021 GO:0016311 GO:0016787 GO:0016791 GO:0035335
AIPGENE23541	PTPRF	Receptor-type tyrosine-protein phosphatase F	A4IFW2	ENSCINP00000015322.3
AIPGENE1429	PTPRQ	Phosphatidylinositol phosphatase PTPRQ	O88488	ENSCINP00000015322.3
AIPGENE21680	PTPRQ	Phosphatidylinositol phosphatase PTPRQ	O88488	ENSCINP00000015322.3
AIPGENE25229	PTPRQ	Phosphatidylinositol phosphatase PTPRQ	P0C5E4	ENSCINP00000015322.3
AIPGENE16036	PUF60	Poly(U)-binding-splicing factor PUF60	Q9WV25	ENSCINP00000017200.3
AIPGENE9739	QRFPR	Pyroglutamylated RFamide peptide receptor	Q96P65	ENSCINP00000000421.3	GO:0004871 GO:0004930 GO:0005887 GO:0007165 GO:0007186 GO:0007200 GO:0007218 GO:0008528 GO:0016020 GO:0016021
AIPGENE1366	RAN	GTP-binding nuclear protein Ran	P52301	ENSCINP00000008166.3	GO:0000054 GO:0000166 GO:0003924 GO:0005525 GO:0005634 GO:0005737 GO:0006606 GO:0006810 GO:0006886 GO:0006913 GO:0007165 GO:0007264 GO:0015031
AIPGENE7612	RBP2A	Reticulocyte-binding protein 2 homolog a	Q8IDX6	ENSCINP00000013676.3	GO:0000166 GO:0004672 GO:0005524 GO:0005859 GO:0005865 GO:0006468 GO:0006941 GO:0007015 GO:0008307 GO:0016301 GO:0016310 GO:0016740 GO:0030018 GO:0031430 GO:0045214 GO:0051015 GO:0051371 GO:0071688 GO:0097493
AIPGENE26089	RNF17	RING finger protein 17	Q9BXT8	ENSCINP00000030398.1
AIPGENE26150	ROR2	Tyrosine-protein kinase transmembrane receptor ROR2	Q01974	ENSCINP00000025646.2
AIPGENE20974	ROST	Protein rolling stone	O44252	ENSCINP00000029351.2
AIPGENE11062	RQL4A	ATP-dependent DNA helicase Q-like 4A	Q8L840	ENSCINP00000004562.3	GO:0000166 GO:0000722 GO:0000731 GO:0000784 GO:0003676 GO:0003677 GO:0003824 GO:0004386 GO:0005524 GO:0005622 GO:0005654 GO:0005737 GO:0006260 GO:0006281 GO:0006284 GO:0006302 GO:0006310 GO:0007569 GO:0008026 GO:0009378 GO:0016787 GO:0031297 GO:0032508 GO:0043140 GO:0044237 GO:0071480
AIPGENE6511	RTXE	Probable RNA-directed DNA polymerase from transposon X-element	Q9NBX4
AIPGENE5684	RU17	U1 small nuclear ribonucleoprotein 70 kDa	Q55FQ0	ENSCINP00000012532.3	GO:0000166 GO:0000243 GO:0000398 GO:0003676 GO:0003729 GO:0005685 GO:0030619 GO:0071004 GO:0071011
AIPGENE20174	S18B1	MFS-type transporter SLC18B1	D3Z5L6	ENSCINP00000030034.1	GO:0016020 GO:0016021 GO:0055085
AIPGENE1245	SAM15	Sterile alpha motif domain-containing protein 15	Q95JY5	ENSCINP00000005696.3
AIPGENE789	SAP3	Ganglioside GM2 activator	Q60648
AIPGENE26536	SC5A7	High-affinity choline transporter 1	O02228	ENSCINP00000008788.3	GO:0005215 GO:0005307 GO:0005887 GO:0006810 GO:0008292 GO:0015871 GO:0016020 GO:0016021 GO:0033265 GO:0055085
AIPGENE6458	SC6A1	Sodium- and chloride-dependent GABA transporter 1	P30531	ENSCINP00000014199.3	GO:0005328 GO:0005887 GO:0006810 GO:0006836 GO:0015293 GO:0015375 GO:0016020 GO:0016021 GO:0036233 GO:0055085 GO:0060012
AIPGENE9486	SCN4A	Sodium channel protein type 4 subunit alpha	P15390	ENSCINP00000004967.3	GO:0001518 GO:0005216 GO:0005244 GO:0005248 GO:0005272 GO:0005886 GO:0006810 GO:0006811 GO:0006814 GO:0016020 GO:0016021 GO:0019228 GO:0034220 GO:0034765 GO:0035725 GO:0055085 GO:0060078 GO:0086010
AIPGENE1052	SCO1	Protein SCO1 homolog, mitochondrial	A1A4J8	ENSCINP00000018444.3
AIPGENE5852	SF3B1	Splicing factor 3B subunit 1	O57683	ENSCINP00000005223.4	GO:0000245 GO:0003729 GO:0005686 GO:0005689 GO:0071004 GO:0071013
AIPGENE9153	SFSWA	Splicing factor, suppressor of white-apricot homolog	Q3USH5	ENSCINP00000025405.2
AIPGENE2150	SGPP2	Sphingosine-1-phosphate phosphatase 2	Q8IWX5	ENSCINP00000007659.3	GO:0016020 GO:0016021
AIPGENE20701	SLAP1	Cell surface glycoprotein 1	Q06852	ENSCINP00000000374.3
AIPGENE3003	SLAP1	Cell surface glycoprotein 1	Q06852	ENSCINP00000013067.3	GO:0005044 GO:0005507 GO:0006898 GO:0016020 GO:0016641 GO:0055114
AIPGENE14454	SLN14	Schlafen family member 14	P0C7P3
AIPGENE17849	SMD3	Small nuclear ribonucleoprotein Sm D3	P62323	ENSCINP00000024281.2	GO:0000245 GO:0000387 GO:0000932 GO:0000956 GO:0005688 GO:0006396 GO:0017070 GO:0033962 GO:0097526
AIPGENE3157	SNED1	Sushi, nidogen and EGF-like domain-containing protein 1	Q5ZQU0	ENSCINP00000030555.1	GO:0005509 GO:0007160
AIPGENE4545	SPAS1	Spermatogenesis-associated serine-rich protein 1	Q496A3	ENSCINP00000016015.3
AIPGENE5872	SSPO	SCO-spondin	A2VEC9	ENSCINP00000035305.1
AIPGENE13143	STAB2	Stabilin-2	Q8WWQ8	ENSCINP00000032601.1	GO:0005509
AIPGENE11122	SVEP1	Sushi, von Willebrand factor type A, EGF and pentraxin domain-containing protein 1	A2AVA0	ENSCINP00000019994.3
AIPGENE13676	SVEP1	Sushi, von Willebrand factor type A, EGF and pentraxin domain-containing protein 1	P0C6B8	ENSCINP00000025031.2
AIPGENE24130	SVEP1	Sushi, von Willebrand factor type A, EGF and pentraxin domain-containing protein 1	Q4LDE5	ENSCINP00000007127.3	GO:0005509
AIPGENE25129	SVEP1	Sushi, von Willebrand factor type A, EGF and pentraxin domain-containing protein 1	P0C6B8	ENSCINP00000019994.3
AIPGENE5577	SVEP1	Sushi, von Willebrand factor type A, EGF and pentraxin domain-containing protein 1	Q4LDE5	ENSCINP00000019994.3
AIPGENE9664	SVEP1	Sushi, von Willebrand factor type A, EGF and pentraxin domain-containing protein 1	P0C6B8	ENSCINP00000007127.3	GO:0005509
AIPGENE26205	SYRC	Arginine--tRNA ligase, cytoplasmic	P40329	ENSCINP00000015003.3	GO:0000166 GO:0004812 GO:0004814 GO:0005524 GO:0005737 GO:0006412 GO:0006418 GO:0006420 GO:0016874
AIPGENE19101	TAGL	Transgelin	P19966	ENSCINP00000025754.2
AIPGENE24599	TBA1C	Tubulin alpha-1C chain	P68373	ENSCINP00000015767.3
AIPGENE24486	TCPZ	T-complex protein 1 subunit zeta	Q5ZJ54	ENSCINP00000013348.3	GO:0000166 GO:0005524 GO:0005737 GO:0006457 GO:0051082
AIPGENE11198	TEPP	Testis, prostate and placenta-expressed protein	Q6URK8	ENSCINP00000030311.1
AIPGENE8447	TF211	Transposon Tf2-11 polyprotein	Q9UR07	ENSCINP00000031157.1
AIPGENE21136	TGFB2	Transforming growth factor beta-2	P30371	ENSCINP00000017469.3	GO:0005114 GO:0005125 GO:0005576 GO:0005615 GO:0007179 GO:0008083 GO:0010862 GO:0040007 GO:0042127 GO:0042981 GO:0043408 GO:0048468 GO:0060395
AIPGENE18030	TGMH	Hemocyte protein-glutamine gamma-glutamyltransferase	Q05187	ENSCINP00000028847.2	GO:0003810 GO:0018149 GO:0046872
AIPGENE15507	TLL1	Tolloid-like protein 1	O43897	ENSCINP00000007799.3	GO:0004222 GO:0005509 GO:0006508 GO:0008233 GO:0008237 GO:0008270 GO:0016787 GO:0046872
AIPGENE9660	TLL2	Tolloid-like protein 2	Q9WVM6	ENSCINP00000007799.3	GO:0004222 GO:0005509 GO:0006508 GO:0008233 GO:0008237 GO:0008270 GO:0016787 GO:0046872
AIPGENE19148	TM11D	Transmembrane protease serine 11D	O60235	ENSCINP00000025317.2
AIPGENE20827	TM256	Transmembrane protein 256 homolog	A4K526
AIPGENE445	TMED4	Transmembrane emp24 domain-containing protein 4	Q8R1V4	ENSCINP00000016857.3
AIPGENE15399	TMED7	Transmembrane emp24 domain-containing protein 7	Q9Y3B3	ENSCINP00000003864.3	GO:0005789 GO:0006810 GO:0016020 GO:0016021
AIPGENE3070	TMM62	Transmembrane protein 62	Q0P6H9	ENSCINP00000013110.3	GO:0016020 GO:0016021 GO:0016787
AIPGENE1274	TMM79	Transmembrane protein 79	Q9BSE2
AIPGENE2211	TMM98	Transmembrane protein 98	Q6INX1	ENSCINP00000034941.1
AIPGENE13889	TNF10	Tumor necrosis factor ligand superfamily member 10	P50591	ENSCINP00000036550.1
AIPGENE20516	TOP1	DNA topoisomerase 1	P41512	ENSCINP00000006314.3	GO:0003677 GO:0003917 GO:0003918 GO:0005694 GO:0005730 GO:0006260 GO:0006265 GO:0006338 GO:0007059 GO:0031298
AIPGENE6481	TREX2	Three prime repair exonuclease 2	Q9R1A9	ENSCINP00000032802.1	GO:0003676
AIPGENE3595	TRFE	Serotransferrin	P12346	ENSCINP00000008235.3	GO:0005576 GO:0016020 GO:0016021
AIPGENE551	TSAL	L-threonine ammonia-lyase	Q74FW6	ENSCINP00000019051.3	GO:0003941 GO:0004794 GO:0005737 GO:0006520 GO:0006565 GO:0006567 GO:0030170
AIPGENE14391	UBCD2	Ubiquitin-conjugating enzyme E2-24 kDa	P52485	ENSCINP00000014090.2	GO:0000166 GO:0005524
AIPGENE7518	UD12	UDP-glucuronosyltransferase 1-2	P70691
AIPGENE20406	USH2A	Usherin	O75445	ENSCINP00000009921.3	GO:0016020 GO:0016021
AIPGENE26620	USH2A	Usherin	Q2QI47	ENSCINP00000010645.3	GO:0005102 GO:0030155 GO:0030334 GO:0045995
AIPGENE20205	USOM5	Uncharacterized skeletal organic matrix protein 5	B8VIU6
AIPGENE26588	USOM5	Uncharacterized skeletal organic matrix protein 5	B8VIU6	ENSCINP00000024219.2
AIPGENE3012	VIAAT	Vesicular inhibitory amino acid transporter	Q6DIV6	ENSCINP00000017689.3	GO:0003333 GO:0015171 GO:0016020 GO:0016021
AIPGENE2084	VMA5A	von Willebrand factor A domain-containing protein 5A	O00534	ENSCINP00000012041.3	GO:0003950 GO:0006471
AIPGENE19830	VNT1B	Homeobox protein vent1B	Q9YH71	ENSCINP00000023047.2	GO:0003677 GO:0005634 GO:0006355 GO:0043565
AIPGENE10344	VWA2	von Willebrand factor A domain-containing protein 2	Q6DCQ6	ENSCINP00000031657.1
AIPGENE5655	VWA7	von Willebrand factor A domain-containing protein 7	Q9JHA8	ENSCINP00000015858.3	GO:0005509
AIPGENE659	VWA8	von Willebrand factor A domain-containing protein 8	A3KMH1	ENSCINP00000018067.3	GO:0005524 GO:0016887
AIPGENE13608	WDR49	WD repeat-containing protein 49	Q8IV35	ENSCINP00000011378.2	GO:0005509 GO:0016020 GO:0016021
AIPGENE15889	WHRN	Whirlin	Q9P202	ENSCINP00000031643.1
AIPGENE18854	XLRS1	Retinoschisin	Q9W6R5	ENSCINP00000032368.1	GO:0070492
AIPGENE26095	Y3136	Clavaminate synthase-like protein At3g21360	Q9LIG0
AIPGENE6960	YCP9	Uncharacterized oxidoreductase C663.09c	Q7Z9I2	ENSCINP00000032251.1
AIPGENE22163	YG31B	Transposon Ty3-G Gag-Pol polyprotein	Q99315	ENSCINP00000036259.1	GO:0003676 GO:0008270 GO:0015074
AIPGENE2954	YG31B	Transposon Ty3-G Gag-Pol polyprotein	Q99315	ENSCINP00000032038.1
AIPGENE26025	YLL3	Smr domain-containing protein C11H11.03c	Q9UTP4
AIPGENE13903	ZPP	ZP domain-containing protein	G8HTB6	ENSCINP00000013501.3	GO:0016020 GO:0016021
AIPGENE7095	ZPP	ZP domain-containing protein	G8HTB6	ENSCINP00000033680.1	GO:0016020 GO:0016021
AIPGENE7102	ZPP	ZP domain-containing protein	G8HTB6	ENSCINP00000033680.1	GO:0016020 GO:0016021
AIPGENE843	ZPP	ZP domain-containing protein	G8HTB6	ENSCINP00000033680.1	GO:0016020 GO:0016021
AIPGENE10052	Predicted Protein	Predicted Protein
AIPGENE10088	Predicted Protein	Predicted Protein
AIPGENE10653	Predicted protein	Predicted protein	A7SZR2
AIPGENE10676	Predicted Protein	Predicted Protein
AIPGENE10818	Predicted protein	Predicted protein	W4ZL70
AIPGENE10946	Predicted protein	Predicted protein	K1QAD8
AIPGENE11064	Predicted Protein	Predicted Protein
AIPGENE11080	Predicted protein	Predicted protein	K1QFV0	ENSCINP00000031905.1
AIPGENE11332	Predicted Protein	Predicted Protein
AIPGENE11392	Predicted protein	Predicted protein	A7SFL7
AIPGENE11651	Predicted protein	Predicted protein	A7SLY5
AIPGENE11857	Predicted Protein	Predicted Protein
AIPGENE12058	Predicted protein	Predicted protein	A0A087TAW6	ENSCINP00000024248.2	GO:0005432 GO:0006816 GO:0007154 GO:0016020 GO:0016021 GO:0035725 GO:0055085
AIPGENE12150	Predicted Protein	Predicted Protein
AIPGENE12226	Predicted protein	Predicted protein	I1G3E1
AIPGENE12918	Predicted protein	Predicted protein	A7SBQ7
AIPGENE13469	Predicted protein	Predicted protein	A0A0D2WKZ7
AIPGENE1349	Predicted protein	Predicted protein	A7RLA1
AIPGENE13694	Predicted protein	Predicted protein	A7SH51
AIPGENE13984	Predicted protein	Predicted protein	A0A0B7B5L7
AIPGENE14001	Predicted protein	Predicted protein	A7T249
AIPGENE14083	Predicted Protein	Predicted Protein
AIPGENE14403	Predicted protein	Predicted protein	A7SKN1	ENSCINP00000021776.2
AIPGENE1471	Predicted protein	Predicted protein	A7SY04
AIPGENE1482	Predicted Protein	Predicted Protein
AIPGENE15550	Predicted protein	Predicted protein	C3Z268
AIPGENE15663	Predicted Protein	Predicted Protein
AIPGENE15795	Predicted protein	Predicted protein	A7RNY8
AIPGENE15954	Predicted protein	Predicted protein	A7S4R8
AIPGENE15987	Predicted protein	Predicted protein	A7SRM2
AIPGENE16199	Predicted Protein	Predicted Protein
AIPGENE16288	Predicted Protein	Predicted Protein
AIPGENE16404	Predicted protein	Predicted protein	A7SVZ2
AIPGENE16868	Predicted protein	Predicted protein	A7RFD4	ENSCINP00000025194.2
AIPGENE17146	Predicted protein	Predicted protein	A7S4R8
AIPGENE17179	Predicted Protein	Predicted Protein
AIPGENE17299	Predicted Protein	Predicted Protein
AIPGENE17543	Predicted Protein	Predicted Protein	KXJ27203.1	GO:0005509
AIPGENE1755	Predicted Protein	Predicted Protein
AIPGENE17878	Predicted Protein	Predicted Protein
AIPGENE18192	Predicted protein	Predicted protein	R7UVL8
AIPGENE18429	Predicted Protein	Predicted Protein
AIPGENE18615	Predicted Protein	Predicted Protein
AIPGENE19123	Predicted protein	Predicted protein	A7SRW9
AIPGENE19480	Predicted protein	Predicted protein	A7SPH6	ENSCINP00000032925.1
AIPGENE19594	Predicted protein	Predicted protein	A7S0M0
AIPGENE19601	Predicted protein	Predicted protein	V4BBZ1
AIPGENE19621	Predicted protein	Predicted protein	A7SGB4
AIPGENE19727	Predicted protein	Predicted protein	A7RJW3
AIPGENE20022	Predicted protein	Predicted protein	M1SUN2
AIPGENE20142	Predicted protein	Predicted protein	W4YRC9
AIPGENE20496	Predicted Protein	Predicted Protein
AIPGENE20612	Predicted protein	Predicted protein	C3Y7T5	ENSCINP00000003777.3
AIPGENE20703	Predicted Protein	Predicted Protein
AIPGENE20797	Predicted protein	Predicted protein	A7RYD2
AIPGENE20899	Predicted protein	Predicted protein	A7SUN7
AIPGENE20957	Predicted protein	Predicted protein	A7SUE7
AIPGENE21062	Predicted protein	Predicted protein	A7SHP6
AIPGENE21286	Predicted Protein	Predicted Protein
AIPGENE21863	Predicted protein	Predicted protein	W4Y9V5
AIPGENE22000	Predicted Protein	Predicted Protein
AIPGENE22430	Predicted protein	Predicted protein	A7RTE7
AIPGENE23391	Predicted protein	Predicted protein	A7S5Y5	ENSCINP00000026937.2	GO:0005634
AIPGENE23393	Predicted Protein	Predicted Protein
AIPGENE23394	Predicted protein	Predicted protein	A7SJ52
AIPGENE23589	Predicted protein	Predicted protein	A7SGY7
AIPGENE23764	Predicted Protein	Predicted Protein
AIPGENE23808	Predicted protein	Predicted protein	A7RTG8
AIPGENE2413	Predicted protein	Predicted protein	A7SLX7
AIPGENE24756	Predicted Protein	Predicted Protein
AIPGENE24771	Predicted Protein	Predicted Protein
AIPGENE24791	Predicted Protein	Predicted Protein
AIPGENE24795	Predicted Protein	Predicted Protein
AIPGENE24832	Predicted protein	Predicted protein	V4AH91
AIPGENE25047	Predicted Protein	Predicted Protein
AIPGENE25048	Predicted protein	Predicted protein	C3Z282
AIPGENE25162	Predicted Protein	Predicted Protein
AIPGENE25215	Predicted Protein	Predicted Protein
AIPGENE25239	Predicted Protein	Predicted Protein
AIPGENE25284	Predicted protein	Predicted protein	I1EVC9
AIPGENE26509	Predicted protein	Predicted protein	K1R3J8
AIPGENE26956	Predicted protein	Predicted protein	W4ZF57
AIPGENE27185	Predicted protein	Predicted protein	A7RTP2	ENSCINP00000021776.2
AIPGENE2732	Predicted Protein	Predicted Protein
AIPGENE27361	Predicted Protein	Predicted Protein
AIPGENE27368	Predicted protein	Predicted protein	A7S4E4
AIPGENE28010	Predicted protein	Predicted protein	A7S9X2
AIPGENE28418	Predicted protein	Predicted protein	A7RUV0
AIPGENE28604	Predicted Protein	Predicted Protein
AIPGENE28810	Predicted Protein	Predicted Protein	KXJ15997.1	GO:0003677 GO:0006352
AIPGENE28932	Predicted Protein	Predicted Protein
AIPGENE28943	Predicted protein	Predicted protein	A7SEN9
AIPGENE29057	Predicted protein	Predicted protein	A7SSX4
AIPGENE29082	Predicted Protein	Predicted Protein
AIPGENE29179	Predicted Protein	Predicted Protein
AIPGENE3021	Predicted protein	Predicted protein	A7S0X8
AIPGENE3111	Predicted Protein	Predicted Protein
AIPGENE321	Predicted protein	Predicted protein	A7RGE1
AIPGENE4202	Predicted Protein	Predicted Protein
AIPGENE4274	Predicted Protein	Predicted Protein
AIPGENE4311	Predicted Protein	Predicted Protein
AIPGENE4475	Predicted Protein	Predicted Protein
AIPGENE4911	Predicted Protein	Predicted Protein
AIPGENE4937	Predicted protein	Predicted protein	A7SFQ6
AIPGENE5651	Predicted protein	Predicted protein	A7TCQ4
AIPGENE5667	Predicted Protein	Predicted Protein
AIPGENE596	Predicted Protein	Predicted Protein
AIPGENE5998	Predicted Protein	Predicted Protein
AIPGENE6366	Predicted protein	Predicted protein	I1FTA0	ENSCINP00000032925.1
AIPGENE6504	Predicted protein	Predicted protein	A7T1D0
AIPGENE6535	Predicted protein	Predicted protein	V3ZKL5
AIPGENE6803	Predicted Protein	Predicted Protein
AIPGENE7470	Predicted Protein	Predicted Protein
AIPGENE7876	Predicted protein	Predicted protein	F7ALQ1	ENSCINP00000010994.3
AIPGENE8035	Predicted protein	Predicted protein	A7RTG8
AIPGENE8046	Predicted Protein	Predicted Protein
AIPGENE8081	Predicted Protein	Predicted Protein
AIPGENE8504	Predicted protein	Predicted protein	A7RFV5
AIPGENE8505	Predicted Protein	Predicted Protein
AIPGENE9011	Predicted protein	Predicted protein	A7SG11
AIPGENE9044	Predicted Protein	Predicted Protein
AIPGENE9056	Predicted protein	Predicted protein	A7SFP2
AIPGENE9074	Predicted protein	Predicted protein	Q5I4C4
AIPGENE9090	Predicted Protein	Predicted Protein
AIPGENE9134	Predicted Protein	Predicted Protein
AIPGENE9225	Predicted Protein	Predicted Protein
AIPGENE9239	Predicted protein	Predicted protein	V4CSL7	ENSCINP00000034779.1
AIPGENE9471	Predicted protein	Predicted protein	A7RZR8
AIPGENE9726	Predicted Protein	Predicted Protein
AIPGENE9753	Predicted Protein	Predicted Protein

## Sheet: Table S4. HIBAgene
E. diaphana geneID	Gene name	Discription	UniprotID	C. intestinalis geneID	GOID
AIPGENE22099	AASS	Alpha-aminoadipic semialdehyde synthase, mitochondrial	A8E657	ENSCINP00000019576.3	GO:0016491 GO:0055114
AIPGENE11605	ACAC	Acetyl-CoA carboxylase	P11029	ENSCINP00000005865.3	GO:0000166 GO:0003824 GO:0003989 GO:0004075 GO:0005524 GO:0006633 GO:0016874 GO:0046872
AIPGENE17854	ACEA	Isocitrate lyase	Q9K9H0
AIPGENE20290	ACOD	Acyl-CoA desaturase	O62849	ENSCINP00000033408.1
AIPGENE2600	ACTP2	Equinatoxin-2	P61914
AIPGENE2649	ACTPC	Tenebrosin-C	P61915
AIPGENE25748	AGRD1	Adhesion G-protein coupled receptor D1	A6QLU6	ENSCINP00000011544.3	GO:0004871 GO:0004888 GO:0004930 GO:0005509 GO:0005886 GO:0007155 GO:0007156 GO:0007165 GO:0007166 GO:0007186 GO:0016020 GO:0016021
AIPGENE5636	AL1L1	Cytosolic 10-formyltetrahydrofolate dehydrogenase	Q6GNL7	ENSCINP00000016529.3	GO:0003824 GO:0005737 GO:0006730 GO:0008152 GO:0009058 GO:0009258 GO:0016155 GO:0016491 GO:0016620 GO:0016742 GO:0019145 GO:0047105 GO:0055114
AIPGENE19640	AL3B1	Aldehyde dehydrogenase family 3 member B1	P43353	ENSCINP00000001020.3	GO:0004028 GO:0004029 GO:0004030 GO:0006081 GO:0008152 GO:0016491 GO:0016620 GO:0055114
AIPGENE17420	AMT1	Putative ammonium transporter 1	P54145	ENSCINP00000012012.3	GO:0005887 GO:0006810 GO:0008519 GO:0015695 GO:0015696 GO:0016020 GO:0016021 GO:0019740 GO:0072488
AIPGENE28006	ANAG	Alpha-N-acetylglucosaminidase	P54802	ENSCINP00000024455.2
AIPGENE23315	AOSL	Allene oxide synthase-lipoxygenase protein	O16025	ENSCINP00000033534.1	GO:0016491 GO:0016702 GO:0046872 GO:0051213 GO:0055114
AIPGENE18609	ARID2	AT-rich interactive domain-containing protein 2	Q68CP9	ENSCINP00000013045.3	GO:0001664 GO:0005737 GO:0005764 GO:0006629 GO:0006665 GO:0008047 GO:0043085
AIPGENE6329	ARSB	Arylsulfatase B	P33727	ENSCINP00000007178.3	GO:0003824 GO:0008152 GO:0008484
AIPGENE18100	ATS18	A disintegrin and metalloproteinase with thrombospondin motifs 18	Q8TE60	ENSCINP00000018188.3	GO:0004222 GO:0005578 GO:0006508 GO:0008237 GO:0008270 GO:0031012
AIPGENE3533	ATTY	Tyrosine aminotransferase	Q8QZR1	ENSCINP00000000577.3	GO:0003824 GO:0004838 GO:0006520 GO:0008483 GO:0009058 GO:0009072 GO:0030170
AIPGENE1323	BCAS3	Breast carcinoma-amplified sequence 3 homolog	Q8CCN5	ENSCINP00000024644.2
AIPGENE9338	BGLR	Beta-glucuronidase	O97524	ENSCINP00000032126.1	GO:0004553 GO:0004566 GO:0005764 GO:0005975 GO:0008152 GO:0016020 GO:0016021 GO:0016787 GO:0016798
AIPGENE9365	BGLR	Beta-glucuronidase	Q4FAT7	ENSCINP00000010614.3	GO:0004553 GO:0004566 GO:0005764 GO:0005975 GO:0008152 GO:0016787 GO:0016798 GO:0043231
AIPGENE1836	BPI	Bactericidal permeability-increasing protein	P17213	ENSCINP00000033806.1
AIPGENE2901	CAH2	Carbonic anhydrase 2	Q8UWA5	ENSCINP00000003284.3	GO:0004089 GO:0006730 GO:0008270 GO:0046872
AIPGENE16849	CATB	Cathepsin B	A1E295	ENSCINP00000031460.1	GO:0004197 GO:0005615 GO:0005764 GO:0006508 GO:0008234 GO:0050790 GO:0051603
AIPGENE26156	CATL	Cathepsin L	Q26636	ENSCINP00000015731.3	GO:0004197 GO:0005615 GO:0005764 GO:0006508 GO:0008233 GO:0008234 GO:0016787 GO:0051603
AIPGENE1298	CD63	CD63 antigen	Q76B49	ENSCINP00000031139.1
AIPGENE1271	CFAD	Counting factor associated protein D	Q54TR1	ENSCINP00000015736.3	GO:0004197 GO:0005615 GO:0005764 GO:0006508 GO:0008234 GO:0051603
AIPGENE11370	CGL	Cystathionine gamma-lyase	Q55DV9	ENSCINP00000025947.2	GO:0003824 GO:0030170
AIPGENE7524	CGT	2-hydroxyacylsphingosine 1-beta-galactosyltransferase	Q16880
AIPGENE3160	CHST1	Carbohydrate sulfotransferase 1	Q6DBY9	ENSCINP00000022864.2	GO:0001517 GO:0006790 GO:0008146 GO:0016021 GO:0016740
AIPGENE7759	CNG	Cyclic nucleotide-gated cation channel	P55934	ENSCINP00000014322.3	GO:0005216 GO:0005249 GO:0005887 GO:0006810 GO:0006811 GO:0006813 GO:0016020 GO:0016021 GO:0034220 GO:0042391 GO:0055085 GO:0071805
AIPGENE4172	CNN1	Calponin-1	P26932	ENSCINP00000024676.2	GO:0003779 GO:0005516 GO:0031032
AIPGENE14130	COLA1	Collagen alpha-1(XXI) chain	Q96P44	ENSCINP00000016093.3	GO:0005201 GO:0005578 GO:0005581
AIPGENE19050	COLA1	Collagen alpha-1(XXI) chain	Q96P44	ENSCINP00000016017.3
AIPGENE1554	CP17A	Steroid 17-alpha-hydroxylase/17,20 lyase	P30437	ENSCINP00000032679.1
AIPGENE23070	CP17A	Steroid 17-alpha-hydroxylase/17,20 lyase	O73853	ENSCINP00000022528.2
AIPGENE28157	CPSM	Carbamoyl-phosphate synthase [ammonia], mitochondrial	P31327	ENSCINP00000018277.3	GO:0000050 GO:0003824 GO:0004070 GO:0004087 GO:0004088 GO:0004151 GO:0005524 GO:0005737 GO:0006207 GO:0006526 GO:0006807 GO:0046872
AIPGENE21331	CPT1A	Carnitine O-palmitoyltransferase 1, liver isoform	P50416	ENSCINP00000007072.3	GO:0016020 GO:0016021 GO:0016746
AIPGENE13178	CTP5A	Contactin-associated protein like 5-1	Q0V8T9	ENSCINP00000010540.3
AIPGENE5888	CTRB	Chymotrypsinogen B	P00767	ENSCINP00000031261.1	GO:0004252 GO:0006508 GO:0008233 GO:0008236 GO:0016787
AIPGENE17825	CTX1	Toxin CrTX-A	Q9GV72
AIPGENE17834	CTX1	Toxin CrTX-A	Q9GV72
AIPGENE5556	CYS2	Probable serine-O-acetyltransferase cys2	Q10341	ENSCINP00000033915.1	GO:0009001 GO:0016787 GO:0019344
AIPGENE22204	CYSP	Cathepsin B-like cysteine proteinase	P25792	ENSCINP00000019058.3	GO:0004177 GO:0004197 GO:0005615 GO:0005764 GO:0006508 GO:0006919 GO:0006955 GO:0008233 GO:0008234 GO:0008656 GO:0010952 GO:0016787 GO:0051603 GO:2001235
AIPGENE6491	DHCR7	7-dehydrocholesterol reductase	Q7SXF1	ENSCINP00000014788.3	GO:0006695 GO:0016020 GO:0016021 GO:0016628 GO:0030176 GO:0047598 GO:0055114
AIPGENE24026	DHE3	Glutamate dehydrogenase	P94598	ENSCINP00000019611.3	GO:0006520 GO:0016491 GO:0016639 GO:0055114
AIPGENE27618	DHE3	Glutamate dehydrogenase	P94598	ENSCINP00000019611.3	GO:0006520 GO:0016491 GO:0016639 GO:0055114
AIPGENE20433	DIRA2	GTP-binding protein Di-Ras2	Q5R6S2	ENSCINP00000015095.3	GO:0000166 GO:0005525 GO:0005622 GO:0007165 GO:0007264 GO:0016020
AIPGENE20966	DIRC2	Disrupted in renal carcinoma protein 2 homolog	Q6GNV7	ENSCINP00000023309.2
AIPGENE15640	DMBT1	Deleted in malignant brain tumors 1 protein	Q9UGM3	ENSCINP00000015917.3	GO:0004252 GO:0006508 GO:0008233 GO:0008236 GO:0016787
AIPGENE3208	DPF1	Zinc finger protein neuro-d4	Q9QX66	ENSCINP00000033757.1	GO:0008270 GO:0046872
AIPGENE3939	DSCAM	Down syndrome cell adhesion molecule	O60469	ENSCINP00000015860.3	GO:0005509
AIPGENE24155	DYH3	Dynein heavy chain 3, axonemal	Q8BW94	ENSCINP00000031667.1	GO:0003777 GO:0007018
AIPGENE18149	ERMP1	Endoplasmic reticulum metallopeptidase 1	Q3UVK0	ENSCINP00000035901.1	GO:0016020 GO:0016021
AIPGENE19098	FA46C	Protein FAM46C	Q7ZUP1	ENSCINP00000026866.2
AIPGENE14819	FAD5	Delta(5) fatty acid desaturase	O74212	ENSCINP00000004431.3	GO:0016020 GO:0016021 GO:0020037 GO:0046872
AIPGENE17789	FAMT	Probable fatty acid methyltransferase Rv3720	O69687
AIPGENE11718	FAXC	Failed axon connections homolog	F7E235	ENSCINP00000025230.2	GO:0004364 GO:0005737 GO:0006749
AIPGENE11705	FBN2	Fibrillin-2	P35556	ENSCINP00000010391.3	GO:0005201 GO:0005509 GO:0005578
AIPGENE27824	FBP1	Fibropellin-1	P10079	ENSCINP00000014588.3
AIPGENE22541	FGFR2	Fibroblast growth factor receptor 2	Q91286	ENSCINP00000001598.3	GO:0004672 GO:0004713 GO:0005007 GO:0005524 GO:0006468 GO:0008284 GO:0008543 GO:0016020 GO:0016021 GO:0018108
AIPGENE12192	FMO2	Dimethylaniline monooxygenase [N-oxide-forming] 2	Q8HZ70	ENSCINP00000011417.3	GO:0004497 GO:0004499 GO:0005783 GO:0005789 GO:0016020 GO:0016021 GO:0016491 GO:0017144 GO:0031090 GO:0043231 GO:0050660 GO:0050661 GO:0055114
AIPGENE21768	FMO5	Dimethylaniline monooxygenase [N-oxide-forming] 5	Q8K4C0	ENSCINP00000011417.3	GO:0004497 GO:0004499 GO:0005783 GO:0005789 GO:0016020 GO:0016021 GO:0016491 GO:0017144 GO:0031090 GO:0043231 GO:0050660 GO:0050661 GO:0055114
AIPGENE26282	FOXO	Forkhead box protein O	O16850	ENSCINP00000035316.1	GO:0003677 GO:0003700 GO:0005634 GO:0006351 GO:0006355 GO:0043565
AIPGENE6958	FP	Fibronectin type III domain-containing protein	B8VIW9
AIPGENE22443	FRIS	Soma ferritin	P42577	ENSCINP00000035294.1
AIPGENE14754	FRRS1	Putative ferric-chelate reductase 1	Q6INU7	ENSCINP00000017029.3
AIPGENE9887	FSTL5	Follistatin-related protein 5	Q8N475	ENSCINP00000025719.2
AIPGENE16012	FUCO_BRAFL	Alpha-L-fucosidase2	C3YWU0	ENSCINP00000015524.3
AIPGENE10000	GALK2	N-acetylgalactosamine kinase	Q5XIG6	ENSCINP00000028204.2	GO:0000166 GO:0004335 GO:0005524 GO:0005737 GO:0006012 GO:0008152 GO:0016301 GO:0016310 GO:0016740 GO:0016773 GO:0046835
AIPGENE15776	GAPR1	Golgi-associated plant pathogenesis-related protein 1	Q9CYL5	ENSCINP00000001814.3	GO:0005576
AIPGENE25324	GAPR1	Golgi-associated plant pathogenesis-related protein 1	Q9CYL5	ENSCINP00000001814.3	GO:0005576
AIPGENE8921	GAPR1	Golgi-associated plant pathogenesis-related protein 1	Q9H4G4	ENSCINP00000010145.3	GO:0005576
AIPGENE1512	GBA3	Cytosolic beta-glucosidase	Q5RF65	ENSCINP00000010342.3	GO:0004553 GO:0005975 GO:0008422 GO:1901657
AIPGENE1160	GBP3	Guanylate-binding protein 3	Q9H0R5	ENSCINP00000032288.1
AIPGENE23694	GGLO	L-gulonolactone oxidase	P58710
AIPGENE3097	GNPAT	Dihydroxyacetone phosphate acyltransferase	O15228	ENSCINP00000018520.3	GO:0008152 GO:0008374 GO:0016746 GO:0044255
AIPGENE182	GNS	N-acetylglucosamine-6-sulfatase	P50426	ENSCINP00000019163.3
AIPGENE5657	GPX1	Glutathione peroxidase	Q00277	ENSCINP00000035821.1	GO:0004601 GO:0004602 GO:0006979 GO:0016491 GO:0055114 GO:0098869
AIPGENE1907	GRM8	Metabotropic glutamate receptor 8	P47743	ENSCINP00000025414.2
AIPGENE20480	GST	Glutathione S-transferase	P46428	ENSCINP00000000153.3
AIPGENE12082	GTR1	Solute carrier family 2, facilitated glucose transporter member 1	P20303	ENSCINP00000003472.3	GO:0005215 GO:0006810 GO:0016020 GO:0016021 GO:0022857 GO:0022891 GO:0055085
AIPGENE2706	GTR8	Solute carrier family 2, facilitated glucose transporter member 8	Q9NY64	ENSCINP00000002435.3	GO:0005215 GO:0005351 GO:0005355 GO:0005887 GO:0006810 GO:0015992 GO:0016020 GO:0016021 GO:0022857 GO:0022891 GO:0035428 GO:0046323 GO:0055085 GO:1904659
AIPGENE6170	GTR8	Solute carrier family 2, facilitated glucose transporter member 8	Q9JJZ1	ENSCINP00000019539.3	GO:0005351 GO:0005355 GO:0005887 GO:0006810 GO:0015992 GO:0016020 GO:0016021 GO:0022857 GO:0022891 GO:0035428 GO:0046323 GO:0055085 GO:1904659
AIPGENE20289	HEX	Beta-hexosaminidase	Q04786	ENSCINP00000008969.3	GO:0004553 GO:0004563 GO:0005975
AIPGENE24739	HRH2	Histamine H2 receptor	P47747	ENSCINP00000009895.3	GO:0004930 GO:0007186 GO:0016020 GO:0016021
AIPGENE22432	HSP31	Glyoxalase 3	Q5AF03
AIPGENE21738	HSP7C	Heat shock cognate 71 kDa protein	Q71U34	ENSCINP00000019652.3
AIPGENE17792	HUTH	Histidine ammonia-lyase	P42357	ENSCINP00000013857.3	GO:0003824 GO:0004397 GO:0005737 GO:0006547 GO:0006548 GO:0016829 GO:0016841 GO:0019556 GO:0019557
AIPGENE10180	IFIH1	Interferon-induced helicase C domain-containing protein 1	Q9BYX4	ENSCINP00000031621.1
AIPGENE18569	IFIH1	Interferon-induced helicase C domain-containing protein 1	Q9BYX4	ENSCINP00000031621.1
AIPGENE25676	INO1A	Inositol-3-phosphate synthase 1-A	Q7ZXY0
AIPGENE20336	INSI2	Insulin-induced gene 2 protein	Q91WG1
AIPGENE24707	IRF2	Interferon regulatory factor 2	P14316	ENSCINP00000005767.3	GO:0000975 GO:0003700 GO:0006355
AIPGENE27863	KARG	Arginine kinase	O15990	ENSCINP00000017993.3
AIPGENE7287	KLC	Kinesin light chain	P46824	ENSCINP00000034474.1
AIPGENE9819	KLC	Kinesin light chain	P46822	ENSCINP00000034474.1
AIPGENE26876	KLHL3	Kelch-like protein 3	E0CZ16	ENSCINP00000008089.3	GO:0004842 GO:0031463 GO:0042787
AIPGENE13828	LACS8	Long chain acyl-CoA synthetase 8	Q9SJD4	ENSCINP00000005887.3	GO:0003824 GO:0008152
AIPGENE23106	LGMN	Legumain	Q95M12	ENSCINP00000006801.3	GO:0004197 GO:0005773 GO:0006508 GO:0006624 GO:0008233 GO:0051603
AIPGENE26593	LIP1	Lipase ZK262.3	Q9XTR8
AIPGENE8872	LIPR2	Pancreatic lipase-related protein 2	P54318	ENSCINP00000014633.3	GO:0004806 GO:0005576 GO:0006629 GO:0052689
AIPGENE13786	LSD2	Lipid storage droplets surface-binding protein 2	Q9VXY7
AIPGENE13692	LYAG	Lysosomal alpha-glucosidase	P10253	ENSCINP00000008112.3	GO:0003824 GO:0004553 GO:0005975 GO:0008152 GO:0016787 GO:0016798 GO:0030246
AIPGENE6132	MA2B1	Lysosomal alpha-mannosidase	Q60HE9	ENSCINP00000003992.3	GO:0003824 GO:0004553 GO:0004559 GO:0005975 GO:0006013 GO:0006517 GO:0008152 GO:0008270 GO:0015923 GO:0016787 GO:0016798 GO:0030246 GO:0046872
AIPGENE6148	MA2B1	Lysosomal alpha-mannosidase	Q60HE9	ENSCINP00000003992.3	GO:0003824 GO:0004553 GO:0004559 GO:0005975 GO:0006013 GO:0006517 GO:0008152 GO:0008270 GO:0015923 GO:0016787 GO:0016798 GO:0030246 GO:0046872
AIPGENE4828	MCA7	Metacaspase-7	Q6XPT5
AIPGENE15960	MCAT	Mitochondrial carnitine/acylcarnitine carrier protein	Q9Z2Z6	ENSCINP00000016773.3	GO:0003735 GO:0006412 GO:0006810 GO:0016020 GO:0016021 GO:0055085
AIPGENE9553	MET7B	Methyltransferase-like protein 7B	Q6UX53	ENSCINP00000027827.2	GO:0005737 GO:0005829 GO:0008757 GO:0030791 GO:0032259
AIPGENE2103	MFGM	Lactadherin	P70490	ENSCINP00000006532.3	GO:0005509
AIPGENE20554	MFS12	Major facilitator superfamily domain-containing protein 12	Q3U481	ENSCINP00000031725.1	GO:0016020 GO:0016021
AIPGENE20557	MFS12	Major facilitator superfamily domain-containing protein 12	Q3U481	ENSCINP00000031725.1	GO:0016020 GO:0016021
AIPGENE26741	MFS12	Major facilitator superfamily domain-containing protein 12	Q3U481	ENSCINP00000031725.1	GO:0016020 GO:0016021
AIPGENE14711	MFSD6	Major facilitator superfamily domain-containing protein 6	Q8CBH5	ENSCINP00000006447.3	GO:0016020 GO:0016021
AIPGENE5656	MGLL	Monoglyceride lipase	Q99685	ENSCINP00000020690.3
AIPGENE14222	MIB1	E3 ubiquitin-protein ligase MIB1	Q86YT6	ENSCINP00000001354.3	GO:0004842 GO:0005737 GO:0006897 GO:0007219 GO:0008270 GO:0016567 GO:0046872
AIPGENE14234	MIB2	E3 ubiquitin-protein ligase MIB2	Q5ZIJ9	ENSCINP00000001354.3	GO:0004842 GO:0005737 GO:0006897 GO:0007219 GO:0008270 GO:0016567 GO:0046872
AIPGENE15748	MIP	Lens fiber major intrinsic protein	Q6J8I9	ENSCINP00000011466.3	GO:0005215 GO:0005887 GO:0006810 GO:0006833 GO:0009992 GO:0015250 GO:0015254 GO:0015793 GO:0016020 GO:0016021 GO:0034220
AIPGENE19158	MOG2A	2-acylglycerol O-acyltransferase 2-A	Q2KHS5	ENSCINP00000004063.3	GO:0016747
AIPGENE1928	MOT10	Monocarboxylate transporter 10	Q3U9N9	ENSCINP00000007886.2	GO:0005215 GO:0016020 GO:0016021 GO:0034220 GO:0055085
AIPGENE1268	MOT5	Monocarboxylate transporter 5	Q8R0M8	ENSCINP00000026236.2
AIPGENE3158	MOT8	Monocarboxylate transporter 8	Q8K1P8	ENSCINP00000007886.2	GO:0005215 GO:0016020 GO:0016021 GO:0034220 GO:0055085
AIPGENE15605	MPEG1	Macrophage-expressed gene 1 protein	Q9WV57
AIPGENE1799	MRC1	Macrophage mannose receptor 1	Q61830	ENSCINP00000004176.3	GO:0016020 GO:0016021
AIPGENE4554	MUC2	Mucin-2 (Fragment)	Q62635	ENSCINP00000035305.1
AIPGENE8101	MYOF	Myoferlin	B3DLH6	ENSCINP00000013715.3	GO:0016020 GO:0016021
AIPGENE3953	N2F1A	Nuclear receptor subfamily 2 group F member 1-A	Q06725	ENSCINP00000004102.3	GO:0003677 GO:0003700 GO:0003707 GO:0004879 GO:0005634 GO:0006351 GO:0006355 GO:0008270 GO:0030522 GO:0043401 GO:0043565 GO:0046872
AIPGENE13027	NAGAB	Alpha-N-acetylgalactosaminidase	Q90744	ENSCINP00000031972.1	GO:0003824 GO:0004553 GO:0004557 GO:0005737 GO:0005975 GO:0008152 GO:0016139 GO:0016787 GO:0016798
AIPGENE13031	NAGAB	Alpha-N-acetylgalactosaminidase	Q90744	ENSCINP00000031972.1	GO:0003824 GO:0004553 GO:0004557 GO:0005737 GO:0005975 GO:0008152 GO:0016139 GO:0016787 GO:0016798
AIPGENE17549	NAS4	Zinc metalloproteinase nas-4	P55112	ENSCINP00000030500.1	GO:0004222 GO:0006508 GO:0008233 GO:0008237 GO:0008270 GO:0016787 GO:0046872
AIPGENE8386	NAT16	Probable N-acetyltransferase 16	Q8N8M0
AIPGENE25378	NCA11	Neural cell adhesion molecule 1-A	P16170	ENSCINP00000015860.3	GO:0005509
AIPGENE24468	NCL1	B-box type zinc finger protein ncl-1	P34611
AIPGENE5315	NEP	Neprilysin	P08049	ENSCINP00000011815.3	GO:0004222 GO:0006508 GO:0008237
AIPGENE25764	NETR	Neurotrypsin	O08762	ENSCINP00000013067.3	GO:0005044 GO:0005507 GO:0006898 GO:0016020 GO:0016641 GO:0055114
AIPGENE18582	NFH	Neurofilament heavy polypeptide	P19246
AIPGENE1175	NGB	Neuroglobin	Q99JA8	ENSCINP00000015555.3	GO:0005344 GO:0006810 GO:0015671 GO:0019825 GO:0020037
AIPGENE20032	NPC2	Epididymal secretory protein E1	P79345	ENSCINP00000030926.1
AIPGENE22473	NPC2	Epididymal secretory protein E1	P79345	ENSCINP00000030926.1
AIPGENE22527	NPC2	Protein NPC2 homolog	Q9VQ62	ENSCINP00000021760.2
AIPGENE3074	NPC2	Protein NPC2 homolog	Q9VQ62	ENSCINP00000021760.2
AIPGENE26780	NPHP3	Nephrocystin-3	Q7Z494	ENSCINP00000035104.1	GO:0005813 GO:0007346 GO:0030496
AIPGENE4737	NPHP3	Nephrocystin-3	Q7Z494	ENSCINP00000034474.1
AIPGENE16407	NRF6	Nose resistant to fluoxetine protein 6	Q09225	ENSCINP00000013754.3	GO:0016020 GO:0016021 GO:0016747
AIPGENE11352	NWD1	NACHT domain- and WD repeat-containing protein 1	A6H603	ENSCINP00000035575.1
AIPGENE17506	OCTL	Organic cation transporter-like protein	Q95R48	ENSCINP00000001843.3	GO:0005215 GO:0016020 GO:0016021 GO:0022857 GO:0022891 GO:0055085
AIPGENE6868	OIT3	Oncoprotein-induced transcript 3 protein	Q29RU2
AIPGENE4696	PA2	Phospholipase A2	D2X8K2	ENSCINP00000028223.2
AIPGENE24257	PAN2	PAB-dependent poly(A)-specific ribonuclease subunit PAN2	Q504Q3	ENSCINP00000000762.3	GO:0000289 GO:0000932 GO:0003676 GO:0004535 GO:0031251 GO:0090503
AIPGENE16667	PAPL	Iron/zinc purple acid phosphatase-like protein	A5D6U8
AIPGENE3484	PCP	Lysosomal Pro-X carboxypeptidase	Q5RBU7	ENSCINP00000014308.3	GO:0003085 GO:0004185 GO:0006508 GO:0008236 GO:0008239 GO:0043535 GO:0060055
AIPGENE11495	PHR	Deoxyribodipyrimidine photo-lyase	Q28811
AIPGENE11501	PISD	Phosphatidylserine decarboxylase proenzyme	Q5R8I8	ENSCINP00000036014.1	GO:0004609 GO:0008654
AIPGENE17365	PKHL1	Fibrocystin-L	Q80ZA4	ENSCINP00000032083.1
AIPGENE762	PLBL2	Putative phospholipase B-like 2	Q2KIY5	ENSCINP00000021735.2
AIPGENE11529	PLD2	Phospholipase D2	O14939	ENSCINP00000026201.2
AIPGENE7602	PPT1	Palmitoyl-protein thioesterase 1	Q8HXW6	ENSCINP00000016630.3	GO:0002084 GO:0005764 GO:0006898 GO:0008474 GO:0098599
AIPGENE8936	PRPX	Pathogen-related protein	P16273
AIPGENE27212	PSA	Puromycin-sensitive aminopeptidase	P55786	ENSCINP00000014130.3	GO:0005737 GO:0005886 GO:0006508 GO:0008237 GO:0008270 GO:0042277 GO:0043171 GO:0070006
AIPGENE9002	PXMP2	Peroxisomal membrane protein 2	Q07066	ENSCINP00000026931.2
AIPGENE20314	RAB32	Ras-related protein Rab-32	Q9CZE3	ENSCINP00000013519.3	GO:0005525 GO:0005739 GO:0005802 GO:0007264 GO:0032438 GO:0042470
AIPGENE16826	RDHE2	Epidermal retinol dehydrogenase 2	Q7TQA3	ENSCINP00000002227.3	GO:0016020 GO:0016021
AIPGENE25745	REG1A	Lithostathine-1-alpha	P05451	ENSCINP00000030082.1
AIPGENE2133	RET	Proto-oncogene tyrosine-protein kinase receptor Ret	P35546	ENSCINP00000007167.3	GO:0004672 GO:0004713 GO:0004714 GO:0005524 GO:0006468 GO:0007169 GO:0016020 GO:0016021 GO:0018108
AIPGENE18105	RHBG	Ammonium transporter Rh type B	Q7T070	ENSCINP00000018176.3	GO:0005887 GO:0008519 GO:0015695 GO:0015696 GO:0016020 GO:0016021 GO:0019740 GO:0072488
AIPGENE3139	RNOY	Ribonuclease Oy	Q7M456	ENSCINP00000030837.1
AIPGENE18289	RTJK	RNA-directed DNA polymerase from mobile element jockey	P21328	ENSCINP00000031852.1
AIPGENE1279	SLC15A4	Solute carrier family 15 member 4	Q68F72	ENSCINP00000014849.3	GO:0005215 GO:0006810 GO:0006857 GO:0016020 GO:0016021
AIPGENE27783	SLC15A4	Solute carrier family 15 member 4	Q68F72	ENSCINP00000000708.3	GO:0005215 GO:0006810 GO:0006857 GO:0016020 GO:0016021
AIPGENE27827	SLC15A4	Solute carrier family 15 member 4	O09014	ENSCINP00000033357.1
AIPGENE20198	S1C2A	Sulfotransferase 1C2A	Q9WUW9	ENSCINP00000035987.1
AIPGENE26569	S238B	Solute carrier family 25 member 38-B	P0CAT2	ENSCINP00000018439.3
AIPGENE24231	S23A2	Solute carrier family 23 member 2	B0JZG0	ENSCINP00000007695.3	GO:0005215 GO:0006810 GO:0016020 GO:0016021 GO:0055085
AIPGENE8501	S26A4	Pendrin	Q9R154	ENSCINP00000022644.2
AIPGENE3906	S6A11	Sodium- and chloride-dependent GABA transporter 3	P48066	ENSCINP00000017435.3
AIPGENE6454	S6A13	Sodium- and chloride-dependent GABA transporter 2	P31646	ENSCINP00000017435.3
AIPGENE17806	SC5A3	Sodium/myo-inositol cotransporter	P31637	ENSCINP00000014618.3
AIPGENE23673	SC5D	Lathosterol oxidase	O88822	ENSCINP00000027428.2
AIPGENE3555	SCPDL	Saccharopine dehydrogenase-like oxidoreductase	Q8NBX0	ENSCINP00000023327.2	GO:0016020 GO:0016021 GO:0016491 GO:0055114
AIPGENE21060	SCRK	Putative fructokinase	O05510
AIPGENE17639	SEM5B	Semaphorin-5B	Q9P283	ENSCINP00000015858.3	GO:0005509
AIPGENE19729	SLD1	Delta(8)-fatty-acid desaturase	Q43469	ENSCINP00000019998.3
AIPGENE2530	SPDEF	SAM pointed domain-containing Ets transcription factor	Q9WTP3	ENSCINP00000024831.2	GO:0000981 GO:0003677 GO:0003700 GO:0005634 GO:0006355 GO:0006357 GO:0030154 GO:0043565
AIPGENE11862	STAR9	StAR-related lipid transfer protein 9	Q9P2P6	ENSCINP00000000065.3	GO:0008289
AIPGENE13021	SYT7	Synaptotagmin-7	O43581	ENSCINP00000001641.3	GO:0005509 GO:0005544 GO:0005886 GO:0006887 GO:0006906 GO:0016020 GO:0017158 GO:0019905 GO:0030276 GO:0048791 GO:0098793
AIPGENE12941	SYT9	Synaptotagmin-9	Q86SS6	ENSCINP00000001641.3	GO:0005509 GO:0005544 GO:0005886 GO:0006887 GO:0006906 GO:0016020 GO:0017158 GO:0019905 GO:0030276 GO:0048791 GO:0098793
AIPGENE3467	T53I2	Tumor protein p53-inducible nuclear protein 2	Q8IXH6
AIPGENE13971	TC1A	Transposable element Tc1 transposase	P03934
AIPGENE18026	TGM1	Protein-glutamine gamma-glutamyltransferase K	P23606	ENSCINP00000010148.3	GO:0003810 GO:0018149 GO:0046872
AIPGENE11194	TM189	Transmembrane protein 189	Q99LQ7	ENSCINP00000018140.3	GO:0005737 GO:0016020 GO:0016021 GO:0016567 GO:0031625 GO:0061630
AIPGENE3242	TM53B	Transmembrane protein 53-B	Q6DJC8	ENSCINP00000004026.3	GO:0016020 GO:0016021
AIPGENE203	TPP1	Tripeptidyl-peptidase 1	Q9EQV6
AIPGENE18406	TRET1	Facilitated trehalose transporter Tret1	A9ZSY3	ENSCINP00000014757.3
AIPGENE18099	TTC28	Tetratricopeptide repeat protein 28	Q96AY4	ENSCINP00000018424.3
AIPGENE24471	TTC28	Tetratricopeptide repeat protein 28	Q96AY4	ENSCINP00000035104.1	GO:0005813 GO:0007346 GO:0030496
AIPGENE24487	TTC28	Tetratricopeptide repeat protein 28	Q96AY4	ENSCINP00000035104.1	GO:0005813 GO:0007346 GO:0030496
AIPGENE27733	TYRO	Tyrosinase	P06845	ENSCINP00000008838.3	GO:0008152 GO:0016491 GO:0046872 GO:0055114
AIPGENE20117	UBC23	Probable ubiquitin-conjugating enzyme E2 23	Q9ZVX1	ENSCINP00000023645.2
AIPGENE15989	USOM3	Uncharacterized skeletal organic matrix protein 3 (Fragment)	B8RJM0
AIPGENE5267	USOM5	Uncharacterized skeletal organic matrix protein 5	B8VIU6
AIPGENE20926	VGFR2	Vascular endothelial growth factor receptor 2	P35918	ENSCINP00000015860.3	GO:0005509
AIPGENE6809	VITRN	Vitrin	Q6UXI7	ENSCINP00000031657.1
AIPGENE17551	VKT1	Kunitz-type protease inhibitor AXPI-I	P81547	ENSCINP00000033091.1	GO:0004867 GO:0010951
AIPGENE18593	VLDLR	Very low-density lipoprotein receptor	P98166	ENSCINP00000031268.1	GO:0005509 GO:0016020 GO:0016021
AIPGENE10923	Y928	Putative protein methyltransferase MJ0928	Q58338	ENSCINP00000025027.2	GO:0001510 GO:0008168 GO:0009452
AIPGENE4562	YH24	Putative aminopeptidase W07G4.4	Q27245	ENSCINP00000016449.3	GO:0004177 GO:0005622 GO:0005737 GO:0006508 GO:0008235 GO:0019538 GO:0030145
AIPGENE15713	YL126	Putative glutamine amidotransferase YLR126C	Q12288
AIPGENE11737	YL8A	Uncharacterized methyltransferase-like C25B8.10	Q9UTA8	ENSCINP00000017019.3
AIPGENE13023	ZCH24	Zinc finger CCHC domain-containing protein 24	B2RVL6	ENSCINP00000010380.3	GO:0003676 GO:0008270
AIPGENE22382	ZN665	Zinc finger protein 665	Q5R8X1	ENSCINP00000001925.3	GO:0003676 GO:0046872
AIPGENE17949	ZNT1	Zinc transporter 1	Q9Y6M5	ENSCINP00000022636.2
AIPGENE10556	Predicted Protein	Predicted Protein
AIPGENE10738	Predicted Protein	Predicted Protein
AIPGENE10743	Predicted protein	Predicted protein	V4A2K2
AIPGENE10749	Predicted protein	Predicted protein	A7SA07
AIPGENE10853	Predicted Protein	Predicted Protein
AIPGENE1092	Predicted Protein	Predicted Protein
AIPGENE11316	Predicted protein	Predicted protein	A7SUN8
AIPGENE11357	Predicted protein	Predicted protein	A7SUN8
AIPGENE11363	Predicted protein	Predicted protein	D2VQ64
AIPGENE12286	Predicted Protein	Predicted Protein
AIPGENE12420	Predicted Protein	Predicted Protein
AIPGENE12482	Predicted Protein	Predicted Protein
AIPGENE12722	Predicted Protein	Predicted Protein
AIPGENE13174	Predicted Protein	Predicted Protein
AIPGENE13688	Predicted protein	Predicted protein	A7S3A5	ENSCINP00000031518.1
AIPGENE13917	Predicted Protein	Predicted Protein
AIPGENE14095	Predicted Protein	Predicted Protein
AIPGENE14493	Predicted Protein	Predicted Protein
AIPGENE15114	Predicted Protein	Predicted Protein
AIPGENE16249	Predicted protein	Predicted protein	R7UA65
AIPGENE16293	Predicted Protein	Predicted Protein
AIPGENE16299	Predicted protein	Predicted protein	E7EXN5	ENSCINP00000034291.1
AIPGENE16386	Predicted protein	Predicted protein	B3RVQ7	ENSCINP00000035970.1	GO:0016020 GO:0016021
AIPGENE16517	Predicted protein	Predicted protein	A7RQD5
AIPGENE16932	Predicted Protein	Predicted Protein
AIPGENE17203	Predicted Protein	Predicted Protein
AIPGENE17481	Predicted Protein	Predicted Protein
AIPGENE17491	Predicted protein	Predicted protein	T1J4M1
AIPGENE1754	Predicted protein	Predicted protein	A7SG99
AIPGENE17637	Predicted protein	Predicted protein	Q0ZST9
AIPGENE17686	Predicted Protein	Predicted Protein
AIPGENE18567	Predicted Protein	Predicted Protein
AIPGENE18767	Predicted Protein	Predicted Protein
AIPGENE19267	Predicted Protein	Predicted Protein
AIPGENE19468	Predicted Protein	Predicted Protein
AIPGENE19608	Predicted protein	Predicted protein	C3ZHH9
AIPGENE2021	Predicted protein	Predicted protein	A7SD04
AIPGENE20726	Predicted protein	Predicted protein	C3Z8R0	ENSCINP00000032921.1	GO:0005802 GO:0016020 GO:0016021
AIPGENE21014	Predicted protein	Predicted protein	A7SIL6
AIPGENE21365	Predicted protein	Predicted protein	A7SA37	ENSCINP00000012169.3	GO:0004930 GO:0004935 GO:0005887 GO:0007186 GO:0007267 GO:0016020 GO:0016021 GO:0071880
AIPGENE21580	Predicted protein	Predicted protein	C3ZYA3
AIPGENE22726	Predicted Protein	Predicted Protein
AIPGENE23311	Predicted protein	Predicted protein	A7SGG2
AIPGENE23942	Predicted Protein	Predicted Protein
AIPGENE24338	Predicted protein	Predicted protein	A7RSY4
AIPGENE25157	Predicted protein	Predicted protein	C3XUM9
AIPGENE26147	Predicted Protein	Predicted Protein
AIPGENE26273	Predicted Protein	Predicted Protein
AIPGENE26386	Predicted protein	Predicted protein	W4YMQ5
AIPGENE26413	Predicted protein	Predicted protein	A7RP09
AIPGENE26443	Predicted protein	Predicted protein	A7RP09
AIPGENE26482	Predicted protein	Predicted protein	A7SR48
AIPGENE26586	Predicted protein	Predicted protein	A7RLT4
AIPGENE26659	Predicted Protein	Predicted Protein
AIPGENE27038	Predicted protein	Predicted protein	A7RLP7
AIPGENE27397	Predicted protein	Predicted protein	A7S3J1
AIPGENE27454	Predicted Protein	Predicted Protein
AIPGENE27869	Predicted protein	Predicted protein	A7SPS5
AIPGENE28713	Predicted protein	Predicted protein	V4C0Z0
AIPGENE3220	Predicted Protein	Predicted Protein
AIPGENE3833	Predicted Protein	Predicted Protein
AIPGENE3851	Predicted Protein	Predicted Protein
AIPGENE3932	Predicted protein	Predicted protein	A7SW67
AIPGENE4137	Predicted Protein	Predicted Protein
AIPGENE4204	Predicted protein	Predicted protein	A7RT43	ENSCINP00000021573.3	GO:0016020 GO:0016021
AIPGENE4213	Predicted Protein	Predicted Protein	KXJ22189.1
AIPGENE4240	Predicted protein	Predicted protein	A7RS57
AIPGENE4275	Predicted Protein	Predicted Protein
AIPGENE4835	Predicted Protein	Predicted Protein
AIPGENE5210	Predicted Protein	Predicted Protein
AIPGENE5409	Predicted protein	Predicted protein	A7SA37
AIPGENE6480	Predicted protein	Predicted protein	A7S4R8
AIPGENE6765	Predicted protein	Predicted protein	A7SXP8
AIPGENE6863	Predicted Protein	Predicted Protein
AIPGENE7096	Predicted protein	Predicted protein	V4AUI6
AIPGENE72	Predicted Protein	Predicted Protein
AIPGENE7613	Predicted Protein	Predicted Protein
AIPGENE8130	Predicted Protein	Predicted Protein
AIPGENE8511	Predicted protein	Predicted protein	I3KX76
AIPGENE8585	Predicted protein	Predicted protein	A7S659
AIPGENE8631	Predicted Protein	Predicted Protein
AIPGENE8674	Predicted protein	Predicted protein	R7RXF9
AIPGENE9919	Predicted protein	Predicted protein	A7SIY5	ENSCINP00000020132.3	GO:0005886 GO:0007411 GO:0016020 GO:0016021 GO:0046875 GO:0048013

## Sheet: Table S5. Breviolum spp. DEG
B. minutum geneID	A. thaliana geneID	UniProt entry name	UniProt Gene names	UniProt protein names	GOID
symbB.v1.2.001109.t1	AT1G29900.1	CARB_ARATH	CARB	Carbamoyl-phosphate synthase large chain, chloroplastic (EC 6.3.5.5) (Carbamoyl-phosphate synthetase ammonia chain) (Protein VENOSA 6)	GO:0000050 GO:0004087 GO:0004088 GO:0005524 GO:0005739 GO:0005951 GO:0006526 GO:0009507 GO:0009570 GO:0016020 GO:0016036 GO:0044205 GO:0046872
symbB.v1.2.003844.t1	AT5G63860.1	UVR8_ARATH	UVR8	Ultraviolet-B receptor UVR8 (Protein UV-B RESISTANCE 8) (RCC1 domain-containing protein UVR8)	GO:0000785 GO:0003682 GO:0005085 GO:0005515 GO:0005634 GO:0005737 GO:0005829 GO:0009411 GO:0009649 GO:0009881 GO:0010224 GO:0018298 GO:0042802 GO:0042803
symbB.v1.2.004610.t1	AT5G44510.4	A0A1P8BBP6_ARATH	TAO1	Target of AVRB operation1	GO:0005524 GO:0006952 GO:0007165 GO:0009816 GO:0042742 GO:0043531
symbB.v1.2.010303.t1	AT5G65750.1	Q9FLH2_ARATH	MPA24.10	2-oxoglutarate dehydrogenase, E1 component (Putative 2-oxoglutarate dehydrogenase E1 component)	GO:0004591 GO:0005739 GO:0008270 GO:0030976 GO:0046686 GO:0050897
symbB.v1.2.025766.t1	AT4G04740.2	F4JGW8_ARATH	CPK23	Calcium-dependent protein kinase 23	GO:0004672 GO:0004683 GO:0005509 GO:0005515 GO:0005516 GO:0005524 GO:0005634 GO:0005737 GO:0005886 GO:0006468 GO:0009738 GO:0009931 GO:0016020 GO:0016301 GO:0018105 GO:0019903 GO:0035556 GO:0046686 GO:0046777
symbB.v1.2.034993.t1	AT4G36180.1	Y4361_ARATH	At4g36180	Probable LRR receptor-like serine/threonine-protein kinase At4g36180 (EC 2.7.11.1)	GO:0004674 GO:0005524 GO:0005886 GO:0006468 GO:0007169 GO:0016021 GO:0016301
symbB.v1.2.014138.t1	AT1G47128.1	RD21A_ARATH	RD21A	Cysteine proteinase RD21A (EC 3.4.22.-) (Protein RESPONSIVE TO DEHYDRATION 21) (RD21)	GO:0000932 GO:0004197 GO:0005515 GO:0005576 GO:0005615 GO:0005764 GO:0005773 GO:0005794 GO:0006508 GO:0008233 GO:0008234 GO:0009414 GO:0009506 GO:0009507 GO:0010494 GO:0048046 GO:0050832 GO:0051603
symbB.v1.2.004810.t1	AT1G50200.2	F4I4Z2_ARATH	ALATS	Alanine--tRNA ligase (EC 6.1.1.7) (Alanyl-tRNA synthetase) (AlaRS)	GO:0000049 GO:0004813 GO:0005524 GO:0005737 GO:0005739 GO:0005829 GO:0006400 GO:0006419 GO:0009507 GO:0016597 GO:0046686 GO:0046872
symbB.v1.2.010710.t1	AT1G61950.1	CDPKJ_ARATH	CPK19	Calcium-dependent protein kinase 19 (EC 2.7.11.1)	GO:0004683 GO:0005509 GO:0005516 GO:0005524 GO:0005634 GO:0005737 GO:0005886 GO:0006468 GO:0009738 GO:0009931 GO:0016301 GO:0018105 GO:0035556 GO:0046777
symbB.v1.2.011717.t1	AT1G64790.3	A0A1P8AT97_ARATH	ILA	ILITYHIA	GO:0005634 GO:0005829 GO:0009507 GO:0009627 GO:0016020 GO:0042742
symbB.v1.2.002493.t1	AT1G79930.1	HSP7O_ARATH	HSP70-14	Heat shock 70 kDa protein 14 (Heat shock protein 70-14) (AtHsp70-14) (Heat shock protein 91)	GO:0005515 GO:0005524 GO:0005634 GO:0005737 GO:0005829 GO:0005886 GO:0006457 GO:0009408 GO:0046686
symbB.v1.2.022102.t1	AT2G04350.2	LACS8_ARATH	LACS8	Long chain acyl-CoA synthetase 8 (EC 6.2.1.3)	GO:0000723 GO:0000784 GO:0004467 GO:0005524 GO:0005783 GO:0005794 GO:0006631 GO:0006633 GO:0009507 GO:0009941 GO:0043047 GO:0102391
symbB.v1.2.033717.t1	AT2G32400.1	GLR37_ARATH	GLR3.7	Glutamate receptor 3.7 (Ionotropic glutamate receptor GLR5) (Ligand-gated ion channel 3.7)	GO:0004970 GO:0005217 GO:0005515 GO:0005576 GO:0006874 GO:0009416 GO:0009506 GO:0016021
symbB.v1.2.039877.t1	AT3G19170.1	PREP1_ARATH	PREP1	Presequence protease 1, chloroplastic/mitochondrial (AtPreP1) (PreP 1) (EC 3.4.24.-) (Zinc metalloprotease 1) (AtZnMP1)	GO:0004222 GO:0005515 GO:0005739 GO:0005759 GO:0006508 GO:0008233 GO:0009507 GO:0009570 GO:0009941 GO:0016485 GO:0046686 GO:0046872 GO:0048046
symbB.v1.2.003253.t1	AT3G25230.1	FKB62_ARATH	FKBP62	Peptidyl-prolyl cis-trans isomerase FKBP62 (PPIase FKBP62) (EC 5.2.1.8) (70 kDa peptidyl-prolyl isomerase) (FK506-binding protein 62) (AtFKBP62) (Immunophilin FKBP62) (Peptidylprolyl isomerase ROF1) (Protein ROTAMASE FKBP 1) (Rotamase)	GO:0003755 GO:0005515 GO:0005516 GO:0005528 GO:0005634 GO:0005737 GO:0005829 GO:0006970 GO:0009408 GO:0009611 GO:0009735 GO:0009845 GO:0032266 GO:0046686 GO:0061077 GO:0070370 GO:0071944 GO:0080025
symbB.v1.2.012494.t1	AT3G25230.1	FKB62_ARATH	FKBP62	Peptidyl-prolyl cis-trans isomerase FKBP62 (PPIase FKBP62) (EC 5.2.1.8) (70 kDa peptidyl-prolyl isomerase) (FK506-binding protein 62) (AtFKBP62) (Immunophilin FKBP62) (Peptidylprolyl isomerase ROF1) (Protein ROTAMASE FKBP 1) (Rotamase)	GO:0003755 GO:0005515 GO:0005516 GO:0005528 GO:0005634 GO:0005737 GO:0005829 GO:0006970 GO:0009408 GO:0009611 GO:0009735 GO:0009845 GO:0032266 GO:0046686 GO:0061077 GO:0070370 GO:0071944 GO:0080025
symbB.v1.2.004124.t1	AT3G58510.3	RH11_ARATH	RH11	DEAD-box ATP-dependent RNA helicase 11 (EC 3.6.4.13)	GO:0003729 GO:0005524 GO:0005730 GO:0005777 GO:0005886 GO:0008026
symbB.v1.2.018894.t1	AT4G24190.2	F4JQ55_ARATH	SHD	Chaperone protein htpG family protein	GO:0005524 GO:0005634 GO:0005739 GO:0005773 GO:0005774 GO:0005783 GO:0005788 GO:0005886 GO:0006457 GO:0009306 GO:0009409 GO:0009414 GO:0009506 GO:0009507 GO:0009651 GO:0009934 GO:0010075 GO:0016020 GO:0016887 GO:0034976 GO:0046686 GO:0048046 GO:0051082
symbB.v1.2.028483.t1	AT4G33470.1	HDA14_ARATH	HDA14	Histone deacetylase 14 (EC 3.5.1.98)	GO:0004407 GO:0005515 GO:0005634 GO:0005829 GO:0006351 GO:0006355 GO:0009507 GO:0016575 GO:0032041 GO:0042903 GO:0043014 GO:0043621 GO:0048487 GO:0051721 GO:0090042
symbB.v1.2.006703.t1	AT5G12000.2	A0A1P8BC68_ARATH	At5g12000	Kinase with adenine nucleotide alpha hydrolases-like domain-containing protein	GO:0004672 GO:0005524 GO:0005634 GO:0006468 GO:0006950 GO:0016301 GO:0016787
symbB.v1.2.015655.t1	AT5G14640.2	KSG5_ARATH	ASK5	Shaggy-related protein kinase epsilon (EC 2.7.11.1) (ASK-epsilon) (Shaggy-related protein kinase 13) (AtSK13)	GO:0004672 GO:0004674 GO:0005515 GO:0005524 GO:0005829 GO:0006972 GO:0009507 GO:0009651 GO:0046777
symbB.v1.2.040764.t1	AT5G15450.1	CLPB3_ARATH	CLPB3	Chaperone protein ClpB3, chloroplastic (ATP-dependent Clp protease ATP-binding subunit ClpB homolog 3) (Casein lytic proteinase B3) (Protein ALBINO OR PALE GREEN 6)	GO:0005524 GO:0005737 GO:0009408 GO:0009507 GO:0009532 GO:0009570 GO:0009658 GO:0016485 GO:0016887
symbB.v1.2.001344.t1	AT5G22060.1	DNAJ2_ARATH	ATJ2	Chaperone protein dnaJ 2 (AtDjA2)	GO:0005524 GO:0005737 GO:0005829 GO:0005886 GO:0006457 GO:0009408 GO:0009506 GO:0031072 GO:0046872 GO:0051082
symbB.v1.2.040261.t1	AT5G23860.2	TBB8_ARATH	TUBB8	Tubulin beta-8 chain (Beta-8-tubulin)	GO:0003924 GO:0005200 GO:0005515 GO:0005525 GO:0005737 GO:0005794 GO:0005874 GO:0007017 GO:0009409 GO:0009651 GO:0010583 GO:0016020 GO:0045298
symbB.v1.2.040262.t1	AT5G23860.2	TBB8_ARATH	TUBB8	Tubulin beta-8 chain (Beta-8-tubulin)	GO:0003924 GO:0005200 GO:0005515 GO:0005525 GO:0005737 GO:0005794 GO:0005874 GO:0007017 GO:0009409 GO:0009651 GO:0010583 GO:0016020 GO:0045298
symbB.v1.2.036077.t1	AT5G26860.1	LONM1_ARATH	LON1	Lon protease homolog 1, mitochondrial (EC 3.4.21.53)	GO:0003677 GO:0004176 GO:0004252 GO:0005515 GO:0005524 GO:0005739 GO:0005759 GO:0005829 GO:0006515 GO:0007005 GO:0008236
symbB.v1.2.018019.t1	AT5G38480.1	14333_ARATH	GRF3	14-3-3-like protein GF14 psi (General regulatory factor 3) (Protein RARE COLD INDUCIBLE 1A)	GO:0005515 GO:0005524 GO:0005618 GO:0005634 GO:0005737 GO:0005739 GO:0005773 GO:0005794 GO:0005829 GO:0005886 GO:0006995 GO:0009409 GO:0009506 GO:0009507 GO:0009631 GO:0009873 GO:0016036 GO:0019222 GO:0019904 GO:0045309 GO:0050826 GO:0051365
symbB.v1.2.026274.t1	AT5G38480.1	14333_ARATH	GRF3	14-3-3-like protein GF14 psi (General regulatory factor 3) (Protein RARE COLD INDUCIBLE 1A)	GO:0005515 GO:0005524 GO:0005618 GO:0005634 GO:0005737 GO:0005739 GO:0005773 GO:0005794 GO:0005829 GO:0005886 GO:0006995 GO:0009409 GO:0009506 GO:0009507 GO:0009631 GO:0009873 GO:0016036 GO:0019222 GO:0019904 GO:0045309 GO:0050826 GO:0051365
symbB.v1.2.006004.t1	AT5G42020.1	MD37F_ARATH	MED37F	Mediator of RNA polymerase II transcription subunit 37f (Heat shock 70 kDa protein 12) (Heat shock protein 70-12) (AtHsp70-12) (Luminal-binding protein 2) (AtBP2) (BiP2)	GO:0005524 GO:0005618 GO:0005634 GO:0005730 GO:0005773 GO:0005774 GO:0005783 GO:0005788 GO:0005886 GO:0006351 GO:0006355 GO:0006457 GO:0009408 GO:0009506 GO:0009507 GO:0009735 GO:0010197 GO:0016020 GO:0016592 GO:0034976 GO:0046686
symbB.v1.2.028955.t1	AT5G50920.1	CLPC1_ARATH	CLPC1	Chaperone protein ClpC1, chloroplastic (ATP-dependent Clp protease ATP-binding subunit ClpC homolog 1) (Casein lytic proteinase C1) (Protein DE-REGULATED CAO ACCUMULATION 1) (Protein IRON-RESCUED MUTANT 1)	GO:0004176 GO:0005515 GO:0005524 GO:0005618 GO:0005739 GO:0009507 GO:0009532 GO:0009535 GO:0009536 GO:0009570 GO:0009658 GO:0009706 GO:0009735 GO:0009941 GO:0010380 GO:0016887 GO:0031897 GO:0045036 GO:0045037
symbB.v1.2.030369.t1	AT5G52640.1	HS901_ARATH	HSP90-1	Heat shock protein 90-1 (AtHSP90.1) (AtHsp90-1) (Heat shock protein 81-1) (Hsp81-1) (Heat shock protein 83)	GO:0005515 GO:0005524 GO:0005618 GO:0005737 GO:0005829 GO:0005886 GO:0009408 GO:0009816 GO:0042742 GO:0046685 GO:0051082 GO:0061077
symbB.v1.2.015892.t1	AT5G56000.1	HS904_ARATH	HSP90-4	Heat shock protein 90-4 (AtHSP90.4) (AtHsp90-4) (Heat shock protein 81-4) (Hsp81-4)	GO:0005524 GO:0005618 GO:0005634 GO:0005737 GO:0005774 GO:0005794 GO:0005829 GO:0005886 GO:0006457 GO:0006950 GO:0009570 GO:0048046 GO:0051082
symbB.v1.2.029700.t1	AT5G56000.1	HS904_ARATH	HSP90-4	Heat shock protein 90-4 (AtHSP90.4) (AtHsp90-4) (Heat shock protein 81-4) (Hsp81-4)	GO:0005524 GO:0005618 GO:0005634 GO:0005737 GO:0005774 GO:0005794 GO:0005829 GO:0005886 GO:0006457 GO:0006950 GO:0009570 GO:0048046 GO:0051082
symbB.v1.2.029704.t1	AT5G56000.1	HS904_ARATH	HSP90-4	Heat shock protein 90-4 (AtHSP90.4) (AtHsp90-4) (Heat shock protein 81-4) (Hsp81-4)	GO:0005524 GO:0005618 GO:0005634 GO:0005737 GO:0005774 GO:0005794 GO:0005829 GO:0005886 GO:0006457 GO:0006950 GO:0009570 GO:0048046 GO:0051082
symbB.v1.2.018945.t1	AT5G56030.1	HS902_ARATH	HSP90-2	Heat shock protein 90-2 (AtHSP90.2) (AtHsp90-2) (Heat shock protein 81-2) (Hsp81-2) (Protein EARLY-RESPONSIVE TO DEHYDRATION 8) (Protein LOSS OF RECOGNITION OF AVRRPM1 2) (Protein MUTANT SNC1-ENHANCING 12)	GO:0003729 GO:0005515 GO:0005524 GO:0005618 GO:0005634 GO:0005737 GO:0005739 GO:0005794 GO:0005829 GO:0006457 GO:0006952 GO:0009408 GO:0009414 GO:0009506 GO:0009651 GO:0009816 GO:0009908 GO:0010187 GO:0010286 GO:0016887 GO:0048366 GO:0050821 GO:0051082 GO:0051131 GO:0061077 GO:0090332
symbB.v1.2.033132.t1	AT5G56030.1	HS902_ARATH	HSP90-2	Heat shock protein 90-2 (AtHSP90.2) (AtHsp90-2) (Heat shock protein 81-2) (Hsp81-2) (Protein EARLY-RESPONSIVE TO DEHYDRATION 8) (Protein LOSS OF RECOGNITION OF AVRRPM1 2) (Protein MUTANT SNC1-ENHANCING 12)	GO:0003729 GO:0005515 GO:0005524 GO:0005618 GO:0005634 GO:0005737 GO:0005739 GO:0005794 GO:0005829 GO:0006457 GO:0006952 GO:0009408 GO:0009414 GO:0009506 GO:0009651 GO:0009816 GO:0009908 GO:0010187 GO:0010286 GO:0016887 GO:0048366 GO:0050821 GO:0051082 GO:0051131 GO:0061077 GO:0090332
symbB.v1.2.029800.t1	AT5G56290.1	PEX5_ARATH	PEX5	Peroxisome biogenesis protein 5 (Peroxin-5) (AtPEX5) (Peroxisomal targeting signal type 1 receptor) (Pex5p)	GO:0005052 GO:0005515 GO:0005634 GO:0005778 GO:0005829 GO:0006625 GO:0009733 GO:0016560
symbB.v1.2.010467.t1	AT5G58140.4	F4KDJ3_ARATH	PHOT2	Phototropin 2	GO:0000155 GO:0000160 GO:0004674 GO:0005515 GO:0005524 GO:0005634 GO:0005794 GO:0005886 GO:0007623 GO:0009637 GO:0009638 GO:0009735 GO:0009882 GO:0009902 GO:0010118 GO:0010181 GO:0010362 GO:0016020 GO:0016301 GO:0018298 GO:0035556 GO:0042802 GO:0046777
symbB.v1.2.006972.t1	AT5G66120.1	DHQS_ARATH	DHQS	3-dehydroquinate synthase, chloroplastic (EC 4.2.3.4)	GO:0003856 GO:0005737 GO:0005768 GO:0005794 GO:0005802 GO:0009073 GO:0009423 GO:0009507 GO:0009570 GO:0046872
symbB.v1.2.000094.t1	AT1G35190.1	Q9C6F0_ARATH	At1g35190	2-oxoglutarate (2OG) and Fe(II)-dependent oxygenase superfamily protein (At1g35190) (Hyoscyamine 6-dioxygenase hydroxylase, putative)	GO:0005737 GO:0009821 GO:0016491 GO:0016706 GO:0046872 GO:0051213 GO:0055114
symbB.v1.2.000744.t1	AT2G25070.2	P2C21_ARATH	PPC4-2	Probable protein phosphatase 2C 21 (AtPP2C21) (EC 3.1.3.16) (AtPPC4;2)	GO:0004722 GO:0005634 GO:0005886 GO:0006470 GO:0009737 GO:0046872
symbB.v1.2.005378.t1	AT4G10120.4	A0A1P8B6E2_ARATH	ATSPS4F	Sucrose-phosphate synthase family protein	GO:0005634 GO:0005886 GO:0016757 GO:0046524
symbB.v1.2.006657.t1	AT3G04710.2	F4J4V4_ARATH	TPR10	Ankyrin repeat family protein	GO:0005575 GO:0008150
symbB.v1.2.009347.t1	AT5G64300.1	RIBA1_ARATH	RIBA1	Bifunctional riboflavin biosynthesis protein RIBA 1, chloroplastic (AtRIBA1) [Includes: 3,4-dihydroxy-2-butanone 4-phosphate synthase (DHBP synthase) (EC 4.1.99.12); GTP cyclohydrolase-2 (EC 3.5.4.25) (GTP cyclohydrolase II)]	GO:0003935 GO:0005525 GO:0008686 GO:0009231 GO:0009507 GO:0009570 GO:0016020 GO:0046872
symbB.v1.2.009837.t1	AT2G47840.1	TI202_ARATH	TIC20-II	Protein TIC 20-II, chloroplastic (Translocon at the inner envelope membrane of chloroplasts 20-II) (AtTIC20-II)	GO:0005739 GO:0009507 GO:0009536 GO:0009706 GO:0009941 GO:0015031 GO:0016021
symbB.v1.2.012069.t1	AT4G34570.5	A0A1P8B676_ARATH	THY-2	Bifunctional dihydrofolate reductase-thymidylate synthase	GO:0004146 GO:0004799 GO:0006231 GO:0006545 GO:0006730 GO:0009165 GO:0009257 GO:0009507 GO:0032259 GO:0046654 GO:0050661 GO:0055114
symbB.v1.2.012814.t1	AT5G42620.2	F4K306_ARATH	MFO20.3	Metalloendopeptidase / zinc ion binding protein	GO:0005886
symbB.v1.2.015277.t1	AT3G59260.1	PRNL4_ARATH	At3g59260	Putative pirin-like protein At3g59260	GO:0005516 GO:0005634
symbB.v1.2.015898.t1	AT5G45400.1	RFA1C_ARATH	RPA1C	Replication protein A 70 kDa DNA-binding subunit C (AtRPA70c) (AtRPA1-2) (Replication factor A protein 1C) (Replication protein A 1C) (AtRPA1C)	GO:0003677 GO:0005634 GO:0006260 GO:0006281 GO:0006310 GO:0046872
symbB.v1.2.016011.t1	AT3G24300.1	AMT13_ARATH	AMT1-3	Ammonium transporter 1 member 3 (AtAMT1;3)	GO:0005886 GO:0005887 GO:0006810 GO:0008519 GO:0010311 GO:0015695 GO:0015696 GO:0016020 GO:0072488 GO:0080181
symbB.v1.2.022050.t1	AT1G76340.1	GONS3_ARATH	GONST3	GDP-mannose transporter GONST3 (Protein GOLGI NUCLEOTIDE SUGAR TRANSPORTER 3)	GO:0000139 GO:0005886 GO:0008643 GO:0015297 GO:0015780 GO:0016020 GO:0016021
symbB.v1.2.023017.t1	AT3G06460.1	Q9SQU9_ARATH	At3g06460	F24P17.4 protein (GNS1/SUR4 membrane protein family)	GO:0003674 GO:0008150 GO:0016021
symbB.v1.2.023478.t1	AT1G03070.3	LFG4_ARATH	LFG4	Protein LIFEGUARD 4 (AtLFG4)	GO:0008150 GO:0016021 GO:0016595
symbB.v1.2.025087.t1	AT1G11390.1	F4I8V6_ARATH	At1g11390	Protein kinase superfamily protein	GO:0005886
symbB.v1.2.029381.t1	AT2G16960.2	Q1PF58_ARATH	At2g16960	ARM repeat superfamily protein (Importin beta-2 subunit family protein)	GO:0005634 GO:0008565 GO:0015031
symbB.v1.2.030912.t1	AT2G40770.3	F4II36_ARATH	At2g40770	RING-finger, DEAD-like helicase, PHD and SNF2 domain-containing protein	GO:0005634
symbB.v1.2.033324.t1	AT2G32390.5	GLR35_ARATH	GLR3.5	Glutamate receptor 3.5 (Ionotropic glutamate receptor GLR6) (Ligand-gated ion channel 3.5)	GO:0004930 GO:0004970 GO:0005216 GO:0005217 GO:0005234 GO:0005739 GO:0005886 GO:0006811 GO:0006874 GO:0007186 GO:0009416 GO:0009507 GO:0009845 GO:0016021 GO:0070584
symbB.v1.2.035092.t1	AT5G55760.1	SIR1_ARATH	SRT1	NAD-dependent protein deacetylase SRT1 (EC 3.5.1.-) (Regulatory protein SIR2 homolog 1) (SIR2-like protein 1)	GO:0003677 GO:0005634 GO:0005677 GO:0005737 GO:0006342 GO:0006355 GO:0016787 GO:0046872 GO:0070403
symbB.v1.2.035131.t1	AT1G24610.1	Q9FYK3_ARATH	At1g24610	F21J9.27 (Rubisco methyltransferase family protein)	GO:0009507
symbB.v1.2.014119.t1	AT3G29390.2	RIK_ARATH	RIK	Protein RIK (Rough sheath 2-interacting KH domain protein) (RS2-interacting KH domain protein)	GO:0003723 GO:0005634 GO:0008150
symbB.v1.2.000553.t1
symbB.v1.2.000729.t2
symbB.v1.2.002453.t1
symbB.v1.2.004489.t1
symbB.v1.2.006190.t1
symbB.v1.2.006485.t1
symbB.v1.2.006662.t1
symbB.v1.2.006674.t1
symbB.v1.2.006939.t1
symbB.v1.2.007805.t1
symbB.v1.2.009050.t1
symbB.v1.2.009338.t2
symbB.v1.2.009845.t1
symbB.v1.2.010238.t1
symbB.v1.2.011248.t1
symbB.v1.2.012438.t1
symbB.v1.2.012498.t1
symbB.v1.2.012792.t1
symbB.v1.2.014506.t1
symbB.v1.2.014634.t1
symbB.v1.2.015952.t1
symbB.v1.2.017503.t1
symbB.v1.2.018823.t1
symbB.v1.2.019579.t1
symbB.v1.2.019791.t1
symbB.v1.2.020598.t1
symbB.v1.2.021635.t1
symbB.v1.2.022234.t1
symbB.v1.2.022714.t1
symbB.v1.2.023175.t1
symbB.v1.2.023346.t1
symbB.v1.2.024748.t1
symbB.v1.2.024757.t1
symbB.v1.2.024924.t1
symbB.v1.2.025040.t1
symbB.v1.2.025131.t1
symbB.v1.2.025135.t1
symbB.v1.2.025283.t1
symbB.v1.2.025497.t1
symbB.v1.2.026162.t1
symbB.v1.2.027630.t1
symbB.v1.2.028077.t1
symbB.v1.2.028225.t1
symbB.v1.2.028298.t1
symbB.v1.2.028741.t1
symbB.v1.2.029913.t1
symbB.v1.2.030149.t1
symbB.v1.2.031586.t1
symbB.v1.2.031823.t1
symbB.v1.2.032324.t1
symbB.v1.2.033518.t1
symbB.v1.2.033681.t1
symbB.v1.2.035210.t1
symbB.v1.2.035467.t1
symbB.v1.2.035741.t1
symbB.v1.2.036226.t1
symbB.v1.2.036945.t1
symbB.v1.2.037278.t1
symbB.v1.2.037360.t1
symbB.v1.2.038399.t1
symbB.v1.2.039367.t1
symbB.v1.2.040571.t1
symbB.v1.2.040844.t1
symbB.v1.2.041086.t1
